# Supplementary material for: VLDLR mediates alphavirus neuroinvasion through the blood-cerebrospinal fluid barrier
Source: Research Square preprint supplement (doi:10.21203/rs.3.rs-3404545/v1), 2023-10-30
Supplement: Supplementary file 1 [file 647b48d1a6388cee6320a2c0.xlsx]

## Sheet: SFV_Rux_vsControlRux.gene_summa
id	num	neg|score	neg|p-value	neg|fdr	neg|rank	neg|goodsgrna	neg|lfc	pos|score	pos|p-value	pos|fdr	pos|rank	pos|goodsgrna	pos|lfc	Significance abs(log(FDR)) against Effect size (log2-fold change)
ATP6V0C	4	1	1	1	19364	0	3.2614	1.45e-16	2.56e-07	0.000707	1	4	3.2614	3.15058
ATP6AP1	4	1	1	1	19363	0	2.5623	6.77e-14	2.56e-07	0.000707	2	4	2.5623	3.15058
ATP6V0B	4	1	1	1	19362	0	2.714	1.09e-13	2.56e-07	0.000707	3	4	2.714	3.15058
ATP6V1B2	4	0.99994	0.99994	1	19343	0	2.5643	5.45e-11	2.56e-07	0.000707	4	4	2.5643	3.15058
ATP6V1A	4	1	1	1	19361	0	2.3637	6.11e-11	2.56e-07	0.000707	5	4	2.3637	3.15058
ATP6V0D1	4	0.99998	0.99998	1	19349	0	2.9314	6.39e-11	2.56e-07	0.000707	6	4	2.9314	3.15058
ATP6AP2	4	0.99999	0.99999	1	19352	0	1.8548	1.36e-08	2.56e-07	0.000707	7	4	1.8548	3.15058
UBL5	4	1	1	1	19360	0	2.2261	1.57e-08	5.11e-07	0.001238	8	4	2.2261	2.90728
RPL18	4	0.57218	0.68048	1	12999	1	1.8587	2.93e-08	1.28e-06	0.00275	9	3	1.8587	2.56067
ATP6V1G1	4	0.99999	0.99999	1	19356	0	1.8661	7.68e-08	1.79e-06	0.00315	10	4	1.8661	2.50169
ATP6V1D	4	1	1	1	19359	0	1.7486	9.39e-08	1.79e-06	0.00315	11	4	1.7486	2.50169
RNASEK	4	0.99845	0.99847	1	19294	0	1.8558	2.4e-07	2.81e-06	0.004538	12	4	1.8558	2.34314
RPL31	4	0.99917	0.99918	1	19318	0	1.9657	5.23e-07	3.83e-06	0.005304	13	4	1.9657	2.2754
VLDLR	4	1	1	1	19358	0	1.4275	8.23e-07	3.83e-06	0.005304	14	4	1.4275	2.2754
ATP6V1E1	4	0.99994	0.99994	1	19342	0	1.6824	1.98e-06	7.41e-06	0.009027	15	4	1.6824	2.04446
RPL8	4	0.98738	0.98739	1	19029	0	1.8295	2.16e-06	7.93e-06	0.009027	16	3	1.8295	2.04446
SFPQ	4	1	1	1	19357	0	1.7574	2.22e-06	7.93e-06	0.009027	17	4	1.7574	2.04446
OR10T2	4	0.99991	0.99991	1	19339	0	1.2471	5.37e-06	2.12e-05	0.022827	18	4	1.2471	1.64155
EIF5B	4	0.99273	0.99272	1	19169	0	1.5057	6.99e-06	3.04e-05	0.02995	19	4	1.5057	1.5236
SNIP1	4	0.9947	0.99472	1	19218	0	1.5202	7.01e-06	3.09e-05	0.02995	20	4	1.5202	1.5236
HCFC1	4	0.99941	0.99942	1	19324	0	1.4463	8.18e-06	3.86e-05	0.035596	21	4	1.4463	1.4486
TWISTNB	4	0.99999	0.99999	1	19355	0	1.0302	1.05e-05	4.93e-05	0.043429	22	4	1.0302	1.36222
EIF3E	4	0.99999	0.99999	1	19354	0	1.2252	1.17e-05	5.29e-05	0.044554	23	4	1.2252	1.35111
MFAP1	4	0.99999	0.99999	1	19353	0	1.5775	1.2e-05	5.55e-05	0.044761	24	4	1.5775	1.3491
ATP6V1F	4	0.96596	0.96618	1	18580	0	0.93177	1.67e-05	7.7e-05	0.058073	25	3	0.93177	1.23603
RPS7	4	0.99998	0.99998	1	19351	0	1.2032	1.71e-05	7.8e-05	0.058073	26	4	1.2032	1.23603
RPS6	4	0.88578	0.88598	1	16946	0	1.3677	1.86e-05	8.77e-05	0.060997	27	3	1.3677	1.21469
ATP6V1C1	4	0.99998	0.99998	1	19350	0	1.2125	1.9e-05	8.82e-05	0.060997	28	4	1.2125	1.21469
ARHGEF39	4	0.99998	0.99998	1	19348	0	1.3696	2.45e-05	0.00011274	0.075282	29	4	1.3696	1.12331
BLOC1S4	4	0.30304	0.45815	1	8824	1	0.96154	2.58e-05	0.00011786	0.076073	30	3	0.96154	1.11877
PAX5	4	0.71255	0.7503	1	14285	1	1.1219	2.79e-05	0.00012604	0.078729	31	3	1.1219	1.10387
RPS16	4	0.99997	0.99997	1	19347	0	1.34	3.29e-05	0.00014342	0.086788	32	4	1.34	1.06154
CEP44	4	0.99996	0.99996	1	19346	0	1.1573	3.92e-05	0.00016592	0.09736	33	4	1.1573	1.01162
CRNKL1	4	0.97451	0.97469	1	18756	0	1.702	4.85e-05	0.00020273	0.115463	34	3	1.702	0.937557
EIF3CL	4	0.99994	0.99995	1	19345	0	1.2634	5.61e-05	0.00022983	0.127157	35	4	1.2634	0.89566
SPAG9	4	0.66149	0.72239	1	13797	1	0.69685	6e-05	0.00024671	0.132701	36	2	0.69685	0.877126
SAP30BP	4	0.9986	0.99859	1	19301	0	1.6558	6.25e-05	0.00025949	0.133012	37	4	1.6558	0.876109
ITM2A	4	0.99994	0.99994	1	19344	0	0.75823	6.29e-05	0.00026102	0.133012	38	4	0.75823	0.876109
RPS23	4	0.99993	0.99993	1	19341	0	1.1206	7.21e-05	0.00029221	0.143688	39	4	1.1206	0.84258
ATP6V1H	4	0.99763	0.99763	1	19270	0	1.0938	7.31e-05	0.00029681	0.143688	40	4	1.0938	0.84258
CD101	4	0.49328	0.64115	1	12286	1	1.1083	7.53e-05	0.00030653	0.144772	41	3	1.1083	0.839315
RPL35A	4	0.99992	0.99992	1	19340	0	1.1768	8.24e-05	0.00033567	0.154028	42	4	1.1768	0.8124
SEPN1	4	0.98066	0.98087	1	18892	0	1.0749	8.52e-05	0.00034539	0.154028	43	3	1.0749	0.8124
SNRNP200	4	0.99962	0.99962	1	19329	0	1.6189	8.63e-05	0.00034999	0.154028	44	4	1.6189	0.8124
RPL19	4	0.99797	0.99799	1	19277	0	1.6093	9.53e-05	0.00038169	0.164246	45	4	1.6093	0.784505
ICE1	4	0.99989	0.9999	1	19338	0	1.2252	0.00010572	0.00041339	0.171371	46	4	1.2252	0.766063
RPL27A	4	0.99979	0.9998	1	19337	0	1.3347	0.00010628	0.00041595	0.171371	47	4	1.3347	0.766063
PMM1	4	0.97053	0.97075	1	18672	0	1.3529	0.00013282	0.00052435	0.209765	48	3	1.3529	0.678267
BAK1	4	0.84171	0.84292	1	16095	1	1.1001	0.00013573	0.0005402	0.209765	49	3	1.1001	0.678267
COPA	4	0.98083	0.98103	1	18898	0	1.6545	0.00013646	0.00054327	0.209765	50	3	1.6545	0.678267
RPL11	4	0.65663	0.71998	1	13744	1	1.6573	0.00013941	0.00055247	0.209765	51	3	1.6573	0.678267
SNRPD2	4	0.99859	0.99859	1	19300	0	1.3439	0.000172	0.00066803	0.24575	52	4	1.3439	0.609506
RPL10	4	0.60094	0.6932	1	13249	1	1.3878	0.00017314	0.00067263	0.24575	53	3	1.3878	0.609506
HOPX	4	0.27286	0.4293	1	8268	2	0.22099	0.00022155	0.00084187	0.301889	54	2	0.22099	0.520153
RPL13A	4	0.87457	0.87486	1	16702	0	1.3406	0.0002329	0.00088533	0.311701	55	3	1.3406	0.506262
NKAP	4	0.99855	0.99855	1	19298	0	1.283	0.00023868	0.00090885	0.314268	56	4	1.283	0.5027
MAGEA2	4	0.99972	0.99974	1	19334	0	1.0715	0.00024591	0.00094004	0.31935	57	4	1.0715	0.495733
NDUFB11	4	0.99974	0.99975	1	19336	0	0.9548	0.00026424	0.0010034	0.321543	58	4	0.9548	0.492761
MECP2	4	0.99538	0.99538	1	19235	0	1.3598	0.00026881	0.0010178	0.321543	59	4	1.3598	0.492761
SF3B6	4	0.95649	0.9567	1	18386	0	1.0816	0.00026966	0.0010208	0.321543	60	3	1.0816	0.492761
RPS8	4	0.99973	0.99975	1	19335	0	1.3819	0.00027029	0.0010224	0.321543	61	4	1.3819	0.492761
SNRPD1	4	0.40194	0.55269	1	10602	1	-0.72451	0.00027275	0.0010295	0.321543	62	2	-0.72451	0
CAPS2	4	0.99971	0.99973	1	19333	0	0.70362	0.00028642	0.0010878	0.333462	63	4	0.70362	0.476954
PRDM14	4	0.93197	0.93223	1	17888	0	1.0395	0.00028937	0.0011021	0.333462	64	3	1.0395	0.476954
QKI	4	0.99969	0.9997	1	19332	0	1.0941	0.00031373	0.0011931	0.355446	65	4	1.0941	0.449226
RPL10A	4	0.99965	0.99965	1	19331	0	1.1335	0.00035109	0.0013194	0.382135	66	4	1.1335	0.417783
MCFD2	4	0.19429	0.35457	0.991925	6907	1	0.62434	0.00035234	0.0013256	0.382135	67	2	0.62434	0.417783
TRAPPC2L	4	0.99964	0.99964	1	19330	0	0.84818	0.00035709	0.0013419	0.382135	68	4	0.84818	0.417783
REL	4	0.2238	0.38273	0.998357	7419	2	0.23585	0.00041098	0.0015459	0.420094	69	2	0.23585	0.376654
ELAVL4	4	0.76334	0.78186	1	14919	1	0.58972	0.00041735	0.0015746	0.420094	70	2	0.58972	0.376654
RBM25	4	0.96584	0.96605	1	18577	0	1.291	0.00042588	0.0016104	0.420094	71	3	1.291	0.376654
CENPC	4	0.99957	0.99957	1	19328	0	0.90955	0.00042737	0.001618	0.420094	72	4	0.90955	0.376654
ABCA10	4	0.99957	0.99957	1	19327	0	0.88159	0.00043307	0.0016395	0.420094	73	4	0.88159	0.376654
ZNF207	4	0.98943	0.98945	1	19080	0	0.98114	0.00043674	0.0016538	0.420094	74	3	0.98114	0.376654
COPG1	4	0.99379	0.9938	1	19194	0	1.2257	0.00044238	0.0016697	0.420094	75	4	1.2257	0.376654
TNNT2	4	0.99956	0.99955	1	19326	0	1.1379	0.00044293	0.0016717	0.420094	76	4	1.1379	0.376654
STK3	4	0.91995	0.92024	1	17638	0	0.93389	0.00044308	0.0016738	0.420094	77	3	0.93389	0.376654
RPA4	4	0.75078	0.77372	1	14763	1	0.71635	0.00044725	0.0016922	0.420094	78	2	0.71635	0.376654
TMEM204	4	0.96329	0.96349	1	18526	0	0.73863	0.00045859	0.0017418	0.420914	79	3	0.73863	0.375807
PAFAH1B3	4	0.99099	0.99101	1	19117	0	0.98398	0.00045895	0.0017438	0.420914	80	4	0.98398	0.375807
HNRNPCL2	4	0.99954	0.99954	1	19325	0	0.66934	0.00046281	0.0017607	0.420914	81	4	0.66934	0.375807
NDC1	4	0.98479	0.98492	1	18971	0	1.0745	0.00046901	0.0017903	0.422784	82	3	1.0745	0.373881
MTRNR2L5	4	0.47971	0.62804	1	12026	2	0.56297	0.00047955	0.0018246	0.425683	83	2	0.56297	0.370914
OR10W1	4	0.44959	0.59867	1	11486	2	-0.28041	0.00049061	0.0018727	0.431695	84	1	-0.28041	0
SMIM21	4	0.21749	0.37669	0.998357	7304	1	0.55005	0.0005059	0.001933	0.440361	85	2	0.55005	0.356191
TCP1	4	0.70794	0.74764	1	14241	1	1.1583	0.00051295	0.0019581	0.440882	86	3	1.1583	0.355678
CT47A7	4	0.99899	0.999	1	19311	0	1.0506	0.00054311	0.0020649	0.456852	87	4	1.0506	0.340224
RPL14	4	0.99841	0.99842	1	19293	0	1.5391	0.000546	0.0020762	0.456852	88	4	1.5391	0.340224
CCT5	4	0.90337	0.90362	1	17300	0	1.161	0.00057271	0.0021754	0.473301	89	3	1.161	0.324863
RALGAPA1	4	0.28899	0.44474	1	8563	1	1.0167	0.00059387	0.0022536	0.484873	90	3	1.0167	0.314372
C1QL1	4	0.85839	0.85877	1	16385	1	1.013	0.00060131	0.0022863	0.486509	91	3	1.013	0.312909
SYT7	4	0.32761	0.48158	1	9261	1	0.9506	0.00063022	0.0023886	0.499894	92	3	0.9506	0.301122
FAM122B	4	0.78953	0.80037	1	15280	1	0.96843	0.00063374	0.0024009	0.499894	93	3	0.96843	0.301122
RBMX2	4	0.99934	0.99935	1	19323	0	0.83307	0.00065704	0.002474	0.509638	94	4	0.83307	0.292738
GLYATL3	4	0.99931	0.99931	1	19322	0	0.87865	0.00069471	0.0026003	0.527935	95	4	0.87865	0.27742
OR7G1	4	0.46968	0.61822	1	11831	1	1.0054	0.00070501	0.0026366	0.527935	96	3	1.0054	0.27742
NOP14	4	0.87829	0.8786	1	16766	0	1.2022	0.00071356	0.0026611	0.527935	97	3	1.2022	0.27742
ESCO1	4	0.99928	0.9993	1	19321	0	0.6531	0.0007164	0.0026718	0.527935	98	4	0.6531	0.27742
H2AFV	4	0.0015745	0.0056911	0.850066	129	2	-0.53992	0.00073664	0.0027378	0.532921	99	2	-0.53992	0.0705474
DNAJB5	4	0.885	0.88523	1	16925	0	1.1069	0.00074107	0.0027521	0.532921	100	3	1.1069	0.273337
FAU	4	0.99924	0.99925	1	19320	0	1.1137	0.00076082	0.0028196	0.539847	101	4	1.1137	0.267729
SGPP2	4	0.9984	0.99841	1	19292	0	0.9118	0.00076777	0.0028436	0.539847	102	4	0.9118	0.267729
RPS9	4	0.99183	0.99186	1	19138	0	1.5665	0.00080582	0.0029699	0.554884	103	4	1.5665	0.255798
SNRPF	4	0.99831	0.99833	1	19290	0	1.4665	0.00080951	0.0029802	0.554884	104	4	1.4665	0.255798
NPNT	4	0.99918	0.99918	1	19319	0	0.92443	0.00082474	0.0030318	0.559123	105	4	0.92443	0.252493
TRAF7	4	0.9953	0.99531	1	19231	0	1.2423	0.00084337	0.0030901	0.560094	106	4	1.2423	0.251739
CDC34	4	0.98918	0.98917	1	19073	0	0.84379	0.00085003	0.0031182	0.560094	107	3	0.84379	0.251739
OR13C4	4	0.72872	0.76002	1	14489	1	0.63107	0.00085199	0.0031238	0.560094	108	2	0.63107	0.251739
NHP2L1	4	0.99513	0.99515	1	19225	0	1.5844	0.00088965	0.0032563	0.57355	109	4	1.5844	0.241429
CXorf49	4	0.98462	0.98475	1	18968	0	1.1616	0.00089462	0.0032803	0.57355	110	3	1.1616	0.241429
CDC42	4	0.99908	0.99908	1	19317	0	1.1555	0.00091902	0.0033631	0.57355	111	4	1.1555	0.241429
RPS11	4	0.39743	0.54822	1	10526	1	1.3187	0.0009265	0.0033892	0.57355	112	3	1.3187	0.241429
ALPK1	4	0.99907	0.99907	1	19316	0	0.53932	0.0009297	0.0034005	0.57355	113	4	0.53932	0.241429
NETO1	4	0.99906	0.99906	1	19315	0	1.0394	0.00093743	0.0034281	0.57355	114	4	1.0394	0.241429
LSM6	4	0.99906	0.99906	1	19314	0	1.0474	0.00093826	0.0034311	0.57355	115	4	1.0474	0.241429
WDR7	4	0.98158	0.98177	1	18910	0	0.94483	0.00094186	0.0034403	0.57355	116	3	0.94483	0.241429
DCAF8L1	4	0.91256	0.91286	1	17473	0	0.91662	0.0009545	0.0034853	0.57355	117	3	0.91662	0.241429
SF3B3	4	0.99904	0.99904	1	19313	0	1.0667	0.00096202	0.0035109	0.57355	118	4	1.0667	0.241429
HUWE1	4	0.99903	0.99904	1	19312	0	0.92958	0.00096597	0.0035247	0.57355	119	4	0.92958	0.241429
EFS	4	0.9907	0.99073	1	19109	0	0.86862	0.00098952	0.0036055	0.581404	120	4	0.86862	0.235522
CDON	4	0.48874	0.63672	1	12200	1	0.78696	0.0010109	0.0036817	0.581404	121	3	0.78696	0.235522
NSRP1	4	0.72191	0.75589	1	14392	1	1.1125	0.0010139	0.0036924	0.581404	122	3	1.1125	0.235522
ZNF764	4	0.99898	0.99899	1	19310	0	0.80305	0.0010156	0.003696	0.581404	123	4	0.80305	0.235522
LHX1	4	0.99657	0.99658	1	19250	0	1.0329	0.0010237	0.0037231	0.581404	124	4	1.0329	0.235522
ANAPC1	4	0.99897	0.99897	1	19309	0	0.90336	0.0010336	0.0037599	0.582455	125	4	0.90336	0.234738
ZNF675	4	0.14377	0.29119	0.986466	5687	2	0.065362	0.0010585	0.0038601	0.590463	126	2	0.065362	0.228807
WBSCR22	4	0.99893	0.99894	1	19308	0	0.72126	0.001068	0.0038918	0.590463	127	4	0.72126	0.228807
HTT	4	0.99893	0.99894	1	19307	0	0.91966	0.0010729	0.0039031	0.590463	128	4	0.91966	0.228807
LSM4	4	0.80346	0.81099	1	15486	1	1.1109	0.0010883	0.0039701	0.59594	129	3	1.1109	0.224797
XKR8	4	0.977	0.97718	1	18811	0	1.0798	0.0011068	0.0040324	0.600647	130	3	1.0798	0.221381
ZNF883	4	0.9648	0.96501	1	18560	0	1.2343	0.001138	0.0041367	0.611481	131	3	1.2343	0.213617
RPLP0	4	0.64941	0.71635	1	13679	1	1.2412	0.0011617	0.0042267	0.62005	132	3	1.2412	0.207573
ELMO1	4	0.99882	0.99882	1	19306	0	0.73512	0.0011845	0.0043024	0.624834	133	4	0.73512	0.204235
RPL30	4	0.96683	0.96705	1	18598	0	1.3666	0.001191	0.0043239	0.624834	134	3	1.3666	0.204235
EIF3I	4	0.99875	0.99875	1	19305	0	0.74079	0.0012508	0.004554	0.653209	135	4	0.74079	0.184948
OCRL	4	0.79495	0.80444	1	15359	1	0.84679	0.001276	0.0046527	0.661209	136	3	0.84679	0.179661
SLC17A8	4	0.9961	0.9961	1	19243	0	0.91225	0.0012818	0.0046787	0.661209	137	4	0.91225	0.179661
RPL23A	4	0.9987	0.9987	1	19304	0	1.1039	0.0012978	0.004736	0.661209	138	4	1.1039	0.179661
FMNL2	4	0.9987	0.9987	1	19303	0	0.68305	0.0013042	0.004757	0.661209	139	4	0.68305	0.179661
RPS4X	4	0.96718	0.96741	1	18606	0	1.3596	0.0013116	0.0047805	0.661209	140	3	1.3596	0.179661
SNRPA1	4	0.9849	0.98502	1	18975	0	1.0122	0.0013251	0.0048337	0.662076	141	3	1.0122	0.179092
DHRS9	4	0.18023	0.34116	0.98987	6672	1	0.80584	0.001331	0.0048551	0.662076	142	3	0.80584	0.179092
TCEB3CL2	4	0.99865	0.99864	1	19302	0	0.7236	0.0013505	0.0049134	0.66534	143	4	0.7236	0.176956
NBPF11	4	0.61551	0.69993	1	13368	1	0.94139	0.001438	0.0052131	0.671628	144	3	0.94139	0.172871
DPYSL2	4	0.99856	0.99856	1	19299	0	0.62413	0.0014434	0.0052345	0.671628	145	4	0.62413	0.172871
CDC40	4	0.98224	0.98243	1	18918	0	1.1245	0.0014445	0.0052376	0.671628	146	3	1.1245	0.172871
C10orf25	4	0.60902	0.69691	1	13313	1	0.85237	0.0014475	0.0052499	0.671628	147	3	0.85237	0.172871
RPL6	4	0.8999	0.90011	1	17232	0	1.4002	0.0014483	0.0052514	0.671628	148	3	1.4002	0.172871
ABT1	4	0.97492	0.9751	1	18772	0	0.9398	0.0014592	0.0052816	0.671628	149	3	0.9398	0.172871
CFHR1	4	0.99854	0.99854	1	19297	0	0.59677	0.0014603	0.0052851	0.671628	150	4	0.59677	0.172871
IQCF1	4	0.88095	0.88124	1	16836	0	0.88177	0.0014688	0.0053179	0.671628	151	3	0.88177	0.172871
RNF130	4	0.28116	0.43723	1	8424	1	0.25874	0.0014713	0.0053255	0.671628	152	2	0.25874	0.172871
PLRG1	4	0.99852	0.99853	1	19296	0	1.0764	0.0014754	0.0053383	0.671628	153	4	1.0764	0.172871
ERRFI1	4	0.99852	0.99853	1	19295	0	0.66669	0.0014766	0.0053414	0.671628	154	4	0.66669	0.172871
PRPF38A	4	0.95195	0.95221	1	18302	0	1.2363	0.0015229	0.0055081	0.688119	155	3	1.2363	0.162336
COL21A1	4	0.85454	0.85502	1	16318	1	0.9351	0.0015651	0.0056589	0.702431	156	3	0.9351	0.153396
DDX39A	4	0.99838	0.9984	1	19291	0	0.73245	0.0016018	0.0057862	0.711151	157	4	0.73245	0.148038
KIAA1109	4	0.19708	0.35721	0.991925	6964	2	-0.35816	0.0016261	0.005868	0.711151	158	1	-0.35816	0.00352116
HNRNPK	4	0.96663	0.96685	1	18594	0	1.1515	0.001627	0.0058701	0.711151	159	3	1.1515	0.148038
GSTT2B	4	0.89085	0.89104	1	17046	0	0.99053	0.001636	0.0059151	0.711151	160	3	0.99053	0.148038
UBLCP1	4	0.87811	0.8784	1	16764	0	0.92387	0.0016426	0.005935	0.711151	161	3	0.92387	0.148038
NDUFS5	4	0.92996	0.93021	1	17849	0	0.99541	0.0016608	0.006	0.711151	162	3	0.99541	0.148038
RPL9	4	0.64084	0.71209	1	13593	1	1.399	0.0016645	0.0060148	0.711151	163	3	1.399	0.148038
UBR7	4	0.70299	0.74487	1	14198	1	0.75756	0.0016671	0.006023	0.711151	164	2	0.75756	0.148038
IL17RA	4	0.1581	0.31447	0.986466	6148	2	-0.098023	0.0016776	0.0060618	0.711401	165	2	-0.098023	0.00591788
FAM131C	4	0.99036	0.99039	1	19102	0	0.8703	0.0017059	0.006161	0.718687	166	4	0.8703	0.14346
HEATR1	4	0.9553	0.95551	1	18366	0	1.0704	0.0017179	0.0062024	0.719185	167	3	1.0704	0.143159
HEATR6	4	0.14428	0.29202	0.986466	5703	1	0.42377	0.0017292	0.0062439	0.719678	168	2	0.42377	0.142862
RPS6KA6	4	0.99825	0.99828	1	19289	0	0.62659	0.0017489	0.0063119	0.723212	169	4	0.62659	0.140734
ARMCX6	4	0.99824	0.99826	1	19288	0	0.67516	0.0017604	0.0063538	0.723733	170	4	0.67516	0.140422
MPO	4	0.99349	0.99349	1	19188	0	0.95587	0.001817	0.0065527	0.729513	171	4	0.95587	0.136967
NOL6	4	0.99817	0.99819	1	19287	0	0.9843	0.0018311	0.0066048	0.729513	172	4	0.9843	0.136967
GOLGA6B	4	0.99817	0.99819	1	19286	0	0.80507	0.0018343	0.0066156	0.729513	173	4	0.80507	0.136967
ATP6V0E1	4	0.59186	0.68911	1	13159	1	0.98096	0.0018443	0.0066503	0.729513	174	3	0.98096	0.136967
SLC35F3	4	0.99816	0.99818	1	19285	0	0.86274	0.0018444	0.0066503	0.729513	175	4	0.86274	0.136967
UTP6	4	0.99442	0.99443	1	19209	0	1.2155	0.001847	0.0066595	0.729513	176	4	1.2155	0.136967
ARAF	4	0.99815	0.99817	1	19284	0	0.6072	0.001849	0.0066682	0.729513	177	4	0.6072	0.136967
HS6ST2	4	0.99813	0.99815	1	19283	0	0.79729	0.0018707	0.0067511	0.732092	178	4	0.79729	0.135434
CCDC94	4	0.99654	0.99655	1	19249	0	0.96679	0.0018747	0.0067674	0.732092	179	4	0.96679	0.135434
ATOH1	4	0.91717	0.91751	1	17569	0	1.0816	0.0018965	0.0068503	0.734451	180	3	1.0816	0.134037
OR7G2	4	0.9981	0.99812	1	19282	0	0.63502	0.0019007	0.0068651	0.734451	181	4	0.63502	0.134037
YWHAG	4	0.23719	0.39542	1	7649	2	-0.35882	0.0019356	0.0069827	0.740004	182	1	-0.35882	0
ART5	4	0.99806	0.99809	1	19281	0	0.645	0.0019381	0.0069934	0.740004	183	4	0.645	0.130766
ZNF772	4	0.99804	0.99806	1	19280	0	0.8808	0.0019572	0.007063	0.740567	184	4	0.8808	0.130436
FAM92B	4	0.96759	0.9678	1	18613	0	0.82984	0.0019615	0.0070752	0.740567	185	3	0.82984	0.130436
RENBP	4	0.18649	0.34709	0.991133	6780	1	0.90787	0.0019945	0.0071923	0.746307	186	2	0.90787	0.127082
FAM83B	4	0.998	0.99802	1	19279	0	0.59026	0.0019989	0.0072072	0.746307	187	4	0.59026	0.127082
NLGN3	4	0.99799	0.99801	1	19278	0	0.55683	0.0020126	0.0072624	0.748025	188	4	0.55683	0.126084
RBM39	4	0.40622	0.55684	1	10686	1	0.9675	0.0020556	0.0074188	0.760097	189	3	0.9675	0.119131
EMG1	4	0.98732	0.98733	1	19026	0	1.106	0.0020903	0.0075334	0.76777	190	3	1.106	0.114769
PRCD	4	0.081742	0.18444	0.964726	3691	1	0.94779	0.0021125	0.0076126	0.771785	191	3	0.94779	0.112504
RPL3	4	0.95309	0.95335	1	18319	0	0.93199	0.0021418	0.0077174	0.7781	192	3	0.93199	0.108965
KRT39	4	0.99785	0.99786	1	19276	0	0.60416	0.002151	0.0077553	0.7781	193	4	0.60416	0.108965
FATE1	4	0.83864	0.84011	1	16041	1	0.82818	0.0021862	0.0078734	0.779021	194	3	0.82818	0.108451
RPS28	4	0.99781	0.99782	1	19275	0	0.94231	0.00219	0.0078852	0.779021	195	4	0.94231	0.108451
OR2A14	4	0.81057	0.81653	1	15602	1	0.83664	0.00219	0.0078852	0.779021	196	3	0.83664	0.108451
ZNF557	4	0.99779	0.9978	1	19274	0	0.63563	0.0022083	0.007948	0.781248	197	4	0.63563	0.107211
SHPK	4	0.22148	0.38049	0.998357	7373	2	0.42812	0.0022529	0.0081209	0.791607	198	2	0.42812	0.10149
PRADC1	4	0.99774	0.99774	1	19273	0	0.95907	0.0022571	0.0081352	0.791607	199	4	0.95907	0.10149
PPP1R32	4	0.99772	0.99772	1	19272	0	0.54699	0.0022802	0.0082088	0.792301	200	4	0.54699	0.10111
XYLT1	4	0.24641	0.40415	1	7802	1	0.9373	0.0022856	0.0082242	0.792301	201	3	0.9373	0.10111
HAUS7	4	0.58744	0.68716	1	13121	1	0.58795	0.0023236	0.0083658	0.801956	202	2	0.58795	0.0958495
NFIB	4	0.99766	0.99766	1	19271	0	0.63228	0.0023395	0.0084218	0.803346	203	4	0.63228	0.0950974
RAB3D	4	0.9974	0.9974	1	19265	0	0.80009	0.0023619	0.0085013	0.804854	204	4	0.80009	0.0942829
SOWAHD	4	0.98442	0.98455	1	18960	0	0.96699	0.0023682	0.0085207	0.804854	205	3	0.96699	0.0942829
PHEX	4	0.76086	0.78026	1	14885	1	0.43729	0.0023894	0.0085974	0.808156	206	2	0.43729	0.0925048
RASL11A	4	0.91973	0.92003	1	17634	0	0.86443	0.0024135	0.0086767	0.811666	207	3	0.86443	0.0906226
HIST1H1B	4	0.99755	0.99755	1	19269	0	0.78057	0.0024508	0.0088198	0.817353	208	4	0.78057	0.0875903
CT47A8	4	0.43135	0.58106	1	11147	1	0.93189	0.0024516	0.0088219	0.817353	209	3	0.93189	0.0875903
DCDC2B	4	0.99753	0.99753	1	19268	0	0.76269	0.0024656	0.0088684	0.817751	210	4	0.76269	0.0873789
STX4	4	0.99751	0.99751	1	19267	0	0.802	0.0024874	0.0089369	0.819432	211	4	0.802	0.0864871
BANP	4	0.99677	0.99678	1	19254	0	0.92025	0.0025051	0.0089845	0.819432	212	4	0.92025	0.0864871
KDM1A	4	0.5262	0.6614	1	12661	1	0.73619	0.0025298	0.0090581	0.819432	213	3	0.73619	0.0864871
CAPRIN1	4	0.88359	0.88386	1	16894	0	0.77879	0.0025421	0.0090995	0.819432	214	3	0.77879	0.0864871
PAH	4	0.14684	0.29629	0.986466	5780	2	0.054099	0.0025543	0.0091389	0.819432	215	2	0.054099	0.0864871
PPT1	4	0.99744	0.99744	1	19266	0	0.52146	0.0025628	0.0091696	0.819432	216	4	0.52146	0.0864871
RPS19	4	0.90571	0.90599	1	17337	0	0.57101	0.002567	0.0091829	0.819432	217	2	0.57101	0.0864871
KRBOX1	4	0.40289	0.55362	1	10621	2	-0.027631	0.0026059	0.009327	0.820655	218	2	-0.027631	0
PRPF19	4	0.9875	0.9875	1	19031	0	0.92105	0.0026297	0.0094002	0.820655	219	3	0.92105	0.0858394
MRAP2	4	0.88784	0.88803	1	16983	0	0.51991	0.0026392	0.0094293	0.820655	220	2	0.51991	0.0858394
CEND1	4	0.99736	0.99736	1	19264	0	0.64334	0.0026407	0.0094354	0.820655	221	4	0.64334	0.0858394
FAF2	4	0.99339	0.99339	1	19185	0	0.78381	0.0026499	0.0094641	0.820655	222	4	0.78381	0.0858394
EDDM3B	4	0.066972	0.15742	0.964726	3135	1	0.40756	0.0026518	0.0094723	0.820655	223	2	0.40756	0.0858394
PTBP1	4	0.34773	0.50076	1	9630	1	0.229	0.0026574	0.0094932	0.820655	224	2	0.229	0.0858394
EIF2AK4	4	0.99232	0.99232	1	19155	0	0.7315	0.0026995	0.00964	0.82877	225	4	0.7315	0.081566
SHD	4	0.88022	0.8805	1	16813	0	0.69476	0.0027091	0.0096727	0.82877	226	2	0.69476	0.081566
USP36	4	0.99725	0.99725	1	19263	0	0.8666	0.002751	0.0098118	0.836983	227	4	0.8666	0.0772834
BMP2K	4	0.99723	0.99724	1	19262	0	0.49323	0.0027659	0.0098629	0.837654	228	4	0.49323	0.0769353
MMP13	4	0.99719	0.99718	1	19261	0	0.44575	0.0028142	0.010037	0.848696	229	4	0.44575	0.0712478
MRPL57	4	0.99137	0.99138	1	19126	0	0.76848	0.0028385	0.010134	0.853229	230	4	0.76848	0.0689344
SEPHS1	4	0.032675	0.091886	0.939418	1884	2	-0.071833	0.0028636	0.01022	0.855475	231	2	-0.071833	0.0271411
C9orf114	4	0.99713	0.99713	1	19260	0	0.88076	0.0028727	0.010249	0.855475	232	4	0.88076	0.0677927
CHI3L2	4	0.79196	0.8022	1	15320	1	0.83792	0.0029248	0.010406	0.862973	233	3	0.83792	0.0640028
SCARF1	4	0.99707	0.99708	1	19259	0	0.5563	0.0029295	0.010428	0.862973	234	4	0.5563	0.0640028
ACTR10	4	0.94495	0.94523	1	18152	0	1.0714	0.0029708	0.010571	0.868833	235	3	1.0714	0.0610637
ESCO2	4	0.99701	0.99702	1	19258	0	0.86726	0.0029931	0.010643	0.868833	236	4	0.86726	0.0610637
WNT16	4	0.42233	0.57234	1	10979	1	0.43005	0.0029976	0.010658	0.868833	237	2	0.43005	0.0610637
FAM83F	4	0.59643	0.69118	1	13200	1	0.44308	0.0030182	0.010723	0.868833	238	2	0.44308	0.0610637
ZNF831	4	0.23289	0.39134	1	7574	1	0.7855	0.0030204	0.010728	0.868833	239	3	0.7855	0.0610637
TMED4	4	0.857	0.85743	1	16359	1	0.7508	0.0030327	0.010768	0.868833	240	3	0.7508	0.0610637
EEF2	4	0.89153	0.89171	1	17065	0	1.0534	0.0030573	0.010855	0.87215	241	3	1.0534	0.0594088
FAM107B	4	0.72739	0.75923	1	14475	1	0.85911	0.0030736	0.010918	0.87364	242	3	0.85911	0.0586675
C10orf128	4	0.99684	0.99686	1	19256	0	0.80277	0.0031155	0.011073	0.876416	243	4	0.80277	0.0572897
KRTAP19-3	4	0.15179	0.30424	0.986466	5956	2	-0.1776	0.0031213	0.011095	0.876416	244	1	-0.1776	0.00591788
LTN1	4	0.36134	0.51368	1	9903	1	0.8604	0.0031255	0.011109	0.876416	245	3	0.8604	0.0572897
MAGEA3	4	0.99684	0.99686	1	19257	0	0.75235	0.0031556	0.011209	0.876416	246	4	0.75235	0.0572897
ISY1	4	0.99683	0.99684	1	19255	0	0.88722	0.0031722	0.011272	0.876416	247	4	0.88722	0.0572897
RPS29	4	0.60057	0.69301	1	13244	1	0.37437	0.0031728	0.011274	0.876416	248	2	0.37437	0.0572897
SMARCAD1	4	0.84647	0.84732	1	16181	1	0.85566	0.0031771	0.011287	0.876416	249	3	0.85566	0.0572897
EIF3A	4	0.98652	0.98656	1	19011	0	1.0833	0.0031834	0.011315	0.876416	250	3	1.0833	0.0572897
FOS	4	0.74287	0.76871	1	14660	1	0.26866	0.0032244	0.011451	0.877523	251	2	0.26866	0.0567415
PEA15	4	0.81966	0.82387	1	15729	1	0.84228	0.0032302	0.011468	0.877523	252	3	0.84228	0.0567415
MYEF2	4	0.99675	0.99677	1	19253	0	0.58338	0.0032481	0.011534	0.877523	253	4	0.58338	0.0567415
RFPL1	4	0.012141	0.040138	0.907737	841	2	-0.29303	0.0032581	0.011568	0.877523	254	2	-0.29303	0.04204
B3GNT6	4	0.96219	0.9624	1	18512	0	0.83578	0.0032779	0.011631	0.877523	255	3	0.83578	0.0567415
CARD17	4	0.74025	0.76708	1	14632	1	0.78809	0.0032897	0.011677	0.877523	256	3	0.78809	0.0567415
SNX12	4	0.99671	0.99672	1	19252	0	1.0198	0.003294	0.011692	0.877523	257	4	1.0198	0.0567415
TERF1	4	0.1404	0.28567	0.986466	5583	2	0.068434	0.0033355	0.011825	0.880527	258	2	0.068434	0.0552573
TEX28	4	0.99665	0.99666	1	19251	0	0.64917	0.0033534	0.011884	0.880527	259	4	0.64917	0.0552573
C3orf36	4	0.87413	0.87442	1	16692	0	0.88258	0.0033567	0.0119	0.880527	260	3	0.88258	0.0552573
OR51B4	4	0.028638	0.083813	0.937554	1723	1	0.8241	0.0033598	0.011914	0.880527	261	3	0.8241	0.0552573
HNF1B	4	0.95928	0.95954	1	18449	0	0.70697	0.0033795	0.01198	0.882035	262	3	0.70697	0.0545142
EFTUD2	4	0.92755	0.92783	1	17804	0	0.57738	0.0034305	0.012159	0.886622	263	2	0.57738	0.0522615
CCDC43	4	0.96978	0.96996	1	18656	0	0.97965	0.003439	0.012187	0.886622	264	3	0.97965	0.0522615
CCDC88B	4	0.1073	0.22962	0.980003	4537	1	0.70959	0.0034532	0.012238	0.886622	265	3	0.70959	0.0522615
TBC1D28	4	0.99652	0.99653	1	19248	0	0.86899	0.0034804	0.012343	0.886622	266	4	0.86899	0.0522615
EXOC1	4	0.78048	0.79378	1	15144	1	0.87189	0.0034844	0.012355	0.886622	267	3	0.87189	0.0522615
BCAP31	4	0.91464	0.91495	1	17516	0	1.0578	0.0035219	0.012489	0.886622	268	3	1.0578	0.0522615
A2ML1	4	0.72272	0.75639	1	14405	1	0.33509	0.0035335	0.012529	0.886622	269	2	0.33509	0.0522615
SNRPB	4	0.67194	0.72779	1	13892	1	1.326	0.0035343	0.012531	0.886622	270	3	1.326	0.0522615
TSGA10IP	4	0.87892	0.87922	1	16787	0	0.74338	0.00354	0.01255	0.886622	271	3	0.74338	0.0522615
ASB8	4	0.99646	0.99646	1	19247	0	0.4998	0.0035445	0.012564	0.886622	272	4	0.4998	0.0522615
PRPF38B	4	0.99643	0.99644	1	19246	0	0.96271	0.00357	0.012644	0.886622	273	4	0.96271	0.0522615
SNAP25	4	0.94444	0.94471	1	18138	0	0.79692	0.0035875	0.012706	0.886622	274	3	0.79692	0.0522615
SELE	4	0.92544	0.92572	1	17759	0	0.64005	0.0035912	0.012715	0.886622	275	2	0.64005	0.0522615
FAM71E1	4	0.74277	0.76865	1	14659	1	0.40243	0.0036279	0.012843	0.886622	276	2	0.40243	0.0522615
SPANXC	4	0.91426	0.91457	1	17505	0	0.74764	0.003634	0.012867	0.886622	277	3	0.74764	0.0522615
RPL5	4	0.23488	0.39325	1	7609	1	0.31193	0.0036365	0.012873	0.886622	278	1	0.31193	0.0522615
KPNB1	4	0.46801	0.6166	1	11802	1	1.1648	0.003676	0.012994	0.886622	279	3	1.1648	0.0522615
CDC5L	4	0.8272	0.83016	1	15842	1	0.47333	0.003688	0.013031	0.886622	280	2	0.47333	0.0522615
PRMT5	4	0.52711	0.66175	1	12666	1	0.76524	0.0036982	0.01307	0.886622	281	2	0.76524	0.0522615
NDUFB4	4	0.9963	0.99631	1	19245	0	0.6284	0.0037016	0.013079	0.886622	282	4	0.6284	0.0522615
NALCN	4	0.9089	0.9092	1	17385	0	0.63445	0.0037057	0.013089	0.886622	283	2	0.63445	0.0522615
CT47A10	4	0.96612	0.96634	1	18584	0	0.75073	0.0037089	0.013099	0.886622	284	3	0.75073	0.0522615
ZNF266	4	0.97794	0.97814	1	18823	0	0.89693	0.0037103	0.013106	0.886622	285	3	0.89693	0.0522615
PCCA	4	0.99628	0.99629	1	19244	0	0.76621	0.0037202	0.013141	0.886622	286	4	0.76621	0.0522615
SNRNP40	4	0.97133	0.97152	1	18690	0	0.87204	0.003743	0.013219	0.888769	287	3	0.87204	0.0512111
C1orf52	4	0.51941	0.65873	1	12606	1	0.94126	0.0037976	0.013409	0.894509	288	3	0.94126	0.0484153
C19orf73	4	0.98332	0.98347	1	18940	0	0.91373	0.0038047	0.013433	0.894509	289	3	0.91373	0.0484153
POLR1A	4	0.98229	0.98248	1	18920	0	1.057	0.0038068	0.013443	0.894509	290	3	1.057	0.0484153
EIF3C	4	0.93972	0.93997	1	18045	0	0.74122	0.0038425	0.013564	0.896345	291	3	0.74122	0.0475248
TBL3	4	0.91961	0.91992	1	17631	0	0.82504	0.0038618	0.013633	0.896345	292	3	0.82504	0.0475248
MKNK1	4	0.89628	0.89652	1	17159	0	0.72584	0.003875	0.013676	0.896345	293	2	0.72584	0.0475248
DDX59	4	0.91422	0.91453	1	17504	0	0.62179	0.003894	0.013735	0.896345	294	3	0.62179	0.0475248
GADD45A	4	0.074594	0.17153	0.964726	3418	2	-0.062024	0.0039455	0.013894	0.896345	295	2	-0.062024	0.015596
RPL4	4	0.99432	0.99434	1	19204	0	1.1362	0.0039499	0.013907	0.896345	296	4	1.1362	0.0475248
C2orf81	4	0.85999	0.86036	1	16408	1	0.85506	0.0039615	0.013951	0.896345	297	3	0.85506	0.0475248
KIF17	4	0.94106	0.94129	1	18071	0	0.79872	0.0039761	0.014001	0.896345	298	3	0.79872	0.0475248
FUCA1	4	0.87658	0.87688	1	16739	0	1.0058	0.003979	0.014014	0.896345	299	3	1.0058	0.0475248
CLDND2	4	0.99601	0.99602	1	19242	0	0.43283	0.0039866	0.014045	0.896345	300	4	0.43283	0.0475248
RPS14	4	0.90729	0.90759	1	17365	0	1.0742	0.0040014	0.014098	0.896345	301	3	1.0742	0.0475248
C1orf189	4	0.99599	0.996	1	19241	0	0.71646	0.0040075	0.014122	0.896345	302	4	0.71646	0.0475248
KIAA1210	4	0.99599	0.99599	1	19240	0	0.47666	0.0040116	0.014137	0.896345	303	4	0.47666	0.0475248
MSMP	4	0.69503	0.74036	1	14113	1	0.81578	0.0040231	0.014178	0.896345	304	3	0.81578	0.0475248
CHCHD2	4	0.90565	0.90593	1	17336	0	0.67765	0.0040285	0.014192	0.896345	305	3	0.67765	0.0475248
ASF1A	4	0.99215	0.99217	1	19147	0	0.98354	0.0040385	0.01422	0.896345	306	4	0.98354	0.0475248
RPS18	4	0.97796	0.97816	1	18825	0	0.96436	0.0040485	0.014257	0.896345	307	3	0.96436	0.0475248
GOLGA8M	4	0.43771	0.58717	1	11265	1	0.74603	0.0041455	0.014566	0.90062	308	2	0.74603	0.0454584
SMNDC1	4	0.13287	0.2731	0.986466	5352	2	-0.013144	0.0041515	0.014588	0.90062	309	2	-0.013144	0.00591788
SPRED3	4	0.54186	0.66762	1	12772	1	0.54532	0.0041613	0.014611	0.90062	310	2	0.54532	0.0454584
EMD	4	0.82052	0.82454	1	15739	1	0.85133	0.0041796	0.014672	0.90062	311	3	0.85133	0.0454584
HK3	4	0.98897	0.98896	1	19066	0	0.46473	0.004203	0.014745	0.90062	312	3	0.46473	0.0454584
IL20RB	4	0.96802	0.96822	1	18622	0	0.71397	0.0042086	0.014764	0.90062	313	2	0.71397	0.0454584
LOC286238	4	0.97478	0.97496	1	18765	0	0.86638	0.0042144	0.014786	0.90062	314	3	0.86638	0.0454584
WDR83OS	4	0.88036	0.88066	1	16816	0	0.88165	0.0042341	0.014843	0.90062	315	3	0.88165	0.0454584
CTAGE9	4	0.82988	0.83244	1	15885	1	0.29046	0.0042545	0.014911	0.90062	316	2	0.29046	0.0454584
CCNG2	4	0.99212	0.99213	1	19146	0	0.89464	0.0042841	0.015009	0.90062	317	4	0.89464	0.0454584
RNF113A	4	0.91362	0.91392	1	17489	0	0.86884	0.0042881	0.015021	0.90062	318	3	0.86884	0.0454584
FOLR3	4	0.93029	0.93054	1	17855	0	0.65753	0.0042907	0.01503	0.90062	319	3	0.65753	0.0454584
MFSD8	4	0.93764	0.93788	1	17994	0	0.77205	0.0043081	0.015083	0.90062	320	3	0.77205	0.0454584
ALS2CR12	4	0.99568	0.99566	1	19239	0	0.67659	0.0043207	0.015128	0.90062	321	4	0.67659	0.0454584
C12orf49	4	0.99346	0.99346	1	19187	0	0.74763	0.004323	0.015133	0.90062	322	4	0.74763	0.0454584
ARL8A	4	0.9914	0.99142	1	19127	0	0.82725	0.0043415	0.015193	0.90062	323	4	0.82725	0.0454584
C18orf21	4	0.97403	0.97422	1	18743	0	0.81722	0.0043482	0.015215	0.90062	324	3	0.81722	0.0454584
ZCCHC9	4	0.99529	0.99529	1	19229	0	0.94054	0.0043725	0.015296	0.90062	325	4	0.94054	0.0454584
ABCC1	4	0.14987	0.30122	0.986466	5889	1	0.86889	0.0043927	0.015363	0.90062	326	3	0.86889	0.0454584
ZNF486	4	0.0010585	0.0038601	0.805334	92	1	0.81406	0.0043965	0.015379	0.90062	327	3	0.81406	0.0454584
GPR152	4	0.022661	0.071373	0.933446	1479	1	0.24985	0.004409	0.015423	0.90062	328	2	0.24985	0.0454584
OPN1MW	4	0.86052	0.8609	1	16413	1	0.52994	0.0044168	0.015446	0.90062	329	2	0.52994	0.0454584
C5orf42	4	0.99558	0.99556	1	19238	0	0.69207	0.004419	0.015452	0.90062	330	4	0.69207	0.0454584
LYRM5	4	0.054306	0.13373	0.964726	2674	1	0.7767	0.0044193	0.015452	0.90062	331	3	0.7767	0.0454584
UTP3	4	0.72673	0.75883	1	14464	1	1.0198	0.004437	0.015514	0.90062	332	3	1.0198	0.0454584
TRIM77	4	0.9048	0.90502	1	17319	0	0.99042	0.0044428	0.015534	0.90062	333	3	0.99042	0.0454584
VSIG4	4	0.99554	0.99553	1	19237	0	0.59234	0.0044625	0.015602	0.901862	334	4	0.59234	0.0448599
EPOR	4	0.38148	0.53286	1	10249	2	0.2596	0.0044818	0.015669	0.901916	335	2	0.2596	0.0448339
ITFG3	4	0.89041	0.89061	1	17040	0	0.72587	0.0044884	0.015696	0.901916	336	3	0.72587	0.0448339
Control_153	4	0.75409	0.77585	1	14806	1	0.54527	0.0045119	0.015771	0.903495	337	3	0.54527	0.0440742
OSCP1	4	0.34643	0.49953	1	9601	1	0.78157	0.0045487	0.015899	0.905883	338	3	0.78157	0.0429279
MYO3A	4	0.72319	0.75667	1	14411	1	0.64451	0.0045583	0.015933	0.905883	339	3	0.64451	0.0429279
CCDC140	4	0.19438	0.35465	0.991925	6909	2	-0.30651	0.0045634	0.015953	0.905883	340	2	-0.30651	0.00352116
GRM2	4	0.99538	0.99539	1	19236	0	0.72798	0.0046161	0.016144	0.914061	341	4	0.72798	0.0390248
IMP4	4	0.99536	0.99537	1	19234	0	0.78037	0.0046408	0.016212	0.915235	342	4	0.78037	0.0384674
TAF1B	4	0.99534	0.99534	1	19233	0	0.55436	0.0046648	0.016285	0.916719	343	4	0.55436	0.0377638
RGP1	4	0.99532	0.99533	1	19232	0	0.71573	0.0046805	0.016342	0.917248	344	4	0.71573	0.0375132
GUCY2F	4	0.99529	0.9953	1	19230	0	0.60722	0.0047073	0.016436	0.919833	345	4	0.60722	0.036291
G3BP2	4	0.61474	0.6996	1	13360	1	0.71402	0.0047754	0.016659	0.921083	346	3	0.71402	0.0357012
PAX6	4	0.99522	0.99524	1	19228	0	0.83035	0.0047754	0.016659	0.921083	347	4	0.83035	0.0357012
C9	4	0.48019	0.62849	1	12038	1	0.81709	0.0047804	0.016673	0.921083	348	3	0.81709	0.0357012
YARS	4	0.99521	0.99522	1	19227	0	0.47989	0.0047914	0.016708	0.921083	349	4	0.47989	0.0357012
STC2	4	0.9952	0.99521	1	19226	0	0.50497	0.0048018	0.016736	0.921083	350	4	0.50497	0.0357012
CT47A12	4	0.83954	0.84095	1	16053	1	0.53419	0.0048207	0.016795	0.921083	351	3	0.53419	0.0357012
HSPA5	4	0.99129	0.99132	1	19124	0	1.4819	0.0048349	0.016839	0.921083	352	4	1.4819	0.0357012
HMGXB4	4	0.78078	0.794	1	15151	1	0.87127	0.0048433	0.016868	0.921083	353	3	0.87127	0.0357012
CCT7	4	0.87288	0.87319	1	16667	0	0.82313	0.004856	0.01691	0.921083	354	3	0.82313	0.0357012
STMN4	4	0.37148	0.52329	1	10095	1	0.64089	0.0048681	0.016952	0.921083	355	3	0.64089	0.0357012
SLIT1	4	0.99512	0.99514	1	19224	0	0.54714	0.0048771	0.016981	0.921083	356	4	0.54714	0.0357012
C11orf95	4	0.9951	0.99511	1	19223	0	0.53352	0.0048986	0.017045	0.921572	357	4	0.53352	0.0354707
SNRPD3	4	0.79443	0.80407	1	15352	1	0.63015	0.0049237	0.017124	0.921572	358	2	0.63015	0.0354707
FCER1A	4	0.93315	0.93344	1	17914	0	0.82505	0.0049333	0.017158	0.921572	359	3	0.82505	0.0354707
OR2W3	4	0.50373	0.65128	1	12466	2	0.59133	0.0049411	0.017182	0.921572	360	2	0.59133	0.0354707
DYNC1I2	4	0.78471	0.79686	1	15216	1	0.99662	0.0049552	0.017228	0.921572	361	3	0.99662	0.0354707
PPIC	4	0.20609	0.36581	0.993904	7122	1	0.56135	0.0049751	0.0173	0.922879	362	2	0.56135	0.0348552
SLC26A8	4	0.9634	0.96361	1	18529	0	0.75569	0.0050092	0.017404	0.924124	363	3	0.75569	0.0342698
ARMCX5	4	0.79607	0.80528	1	15376	1	0.029943	0.0050266	0.017467	0.924124	364	1	0.029943	0.0342698
HIST2H4A	4	0.63033	0.70701	1	13502	1	0.91789	0.0050373	0.017508	0.924124	365	3	0.91789	0.0342698
NUS1	4	0.97876	0.97897	1	18843	0	0.79958	0.0050398	0.017515	0.924124	366	3	0.79958	0.0342698
ZNF287	4	0.8334	0.8355	1	15939	1	0.99447	0.0050572	0.017574	0.924734	367	3	0.99447	0.0339832
HIP1R	4	0.29644	0.45184	1	8689	1	0.47854	0.0050875	0.017687	0.92664	368	2	0.47854	0.033089
LRRC8E	4	0.97235	0.97256	1	18708	0	0.72136	0.0051295	0.017828	0.92664	369	3	0.72136	0.033089
TMEM164	4	0.99483	0.99484	1	19222	0	0.53243	0.0051729	0.017976	0.92664	370	4	0.53243	0.033089
PLA2G2E	4	0.99482	0.99484	1	19221	0	0.66616	0.0051799	0.017999	0.92664	371	4	0.66616	0.033089
Control_31	4	0.93324	0.93352	1	17916	0	0.06143	0.005181	0.018002	0.92664	372	1	0.06143	0.033089
XXYLT1	4	0.78602	0.79784	1	15234	1	0.87753	0.0052189	0.018109	0.92664	373	3	0.87753	0.033089
FASN	4	0.63189	0.70774	1	13513	1	0.42223	0.0052324	0.018146	0.92664	374	3	0.42223	0.033089
FRG1	4	0.064238	0.15232	0.964726	3037	2	0.1165	0.0052578	0.018241	0.92664	375	2	0.1165	0.033089
TET2	4	0.75456	0.77614	1	14811	1	0.48655	0.0052755	0.018303	0.92664	376	2	0.48655	0.033089
RASGEF1B	4	0.99472	0.99474	1	19220	0	0.39953	0.0052763	0.018304	0.92664	377	4	0.39953	0.033089
EIF4E	4	0.99472	0.99474	1	19219	0	0.49762	0.0052804	0.018317	0.92664	378	4	0.49762	0.033089
TRIM10	4	0.88948	0.88966	1	17017	0	-0.10431	0.0052839	0.018329	0.92664	379	1	-0.10431	0
NOP58	4	0.98078	0.98098	1	18897	0	0.78095	0.0053285	0.018473	0.92664	380	2	0.78095	0.033089
OR4F5	4	0.97661	0.97682	1	18806	0	0.7656	0.0053311	0.018482	0.92664	381	3	0.7656	0.033089
WDR66	4	0.98568	0.98577	1	18991	0	0.74408	0.0053329	0.018487	0.92664	382	3	0.74408	0.033089
PHOX2B	4	0.63614	0.70982	1	13558	1	0.43051	0.0053353	0.018498	0.92664	383	3	0.43051	0.033089
CNNM3	4	0.80916	0.8154	1	15576	1	0.93276	0.0053364	0.018502	0.92664	384	3	0.93276	0.033089
TNFRSF10C	4	0.99194	0.99196	1	19141	0	0.85172	0.005363	0.018578	0.92664	385	4	0.85172	0.033089
CCDC92	4	0.87137	0.87165	1	16640	0	0.50663	0.0053867	0.018652	0.92664	386	2	0.50663	0.033089
CPEB4	4	0.99461	0.99463	1	19217	0	0.44433	0.0053884	0.018655	0.92664	387	4	0.44433	0.033089
Control_37	4	0.99461	0.99462	1	19216	0	0.6276	0.0053946	0.018674	0.92664	388	4	0.6276	0.033089
FAM124A	4	0.097483	0.21243	0.971248	4224	2	-0.69575	0.0054175	0.018755	0.92664	389	2	-0.69575	0.0126699
GUCY1B3	4	0.90076	0.90101	1	17246	0	0.67724	0.0054217	0.018769	0.92664	390	3	0.67724	0.033089
GNG8	4	0.99454	0.99455	1	19215	0	0.53962	0.0054617	0.018916	0.92664	391	4	0.53962	0.033089
ITGB1BP2	4	0.93198	0.93225	1	17889	0	0.73444	0.0054712	0.018952	0.92664	392	3	0.73444	0.033089
SPATA13	4	0.99452	0.99453	1	19214	0	0.91517	0.0054784	0.018976	0.92664	393	4	0.91517	0.033089
ENKUR	4	0.99452	0.99453	1	19213	0	0.64121	0.0054804	0.018982	0.92664	394	4	0.64121	0.033089
PBK	4	0.99452	0.99453	1	19212	0	0.61943	0.0054836	0.018992	0.92664	395	4	0.61943	0.033089
OR10K1	4	0.93107	0.93133	1	17869	0	0.89865	0.0054844	0.018998	0.92664	396	3	0.89865	0.033089
MTA3	4	0.9945	0.99451	1	19211	0	0.67844	0.0054981	0.019051	0.926899	397	4	0.67844	0.0329676
SLAMF1	4	0.99447	0.99448	1	19210	0	0.48531	0.0055306	0.019158	0.92813	398	4	0.48531	0.0323912
ZNF418	4	0.99441	0.99442	1	19208	0	0.78759	0.0055852	0.019328	0.92813	399	4	0.78759	0.0323912
SMIM4	4	0.98748	0.98749	1	19030	0	0.87251	0.0055925	0.01935	0.92813	400	3	0.87251	0.0323912
RASIP1	4	0.48003	0.62836	1	12034	1	0.61984	0.0056066	0.0194	0.92813	401	2	0.61984	0.0323912
ATP10A	4	0.99438	0.99439	1	19207	0	0.63598	0.0056201	0.019446	0.92813	402	4	0.63598	0.0323912
USP34	4	0.90886	0.90917	1	17383	0	0.77645	0.0056339	0.019492	0.92813	403	3	0.77645	0.0323912
SPATA2L	4	0.70968	0.74864	1	14266	1	-0.18028	0.0056439	0.019526	0.92813	404	1	-0.18028	0
HES2	4	0.99343	0.99344	1	19186	0	0.94077	0.0056441	0.019528	0.92813	405	4	0.94077	0.0323912
ARCN1	4	0.99435	0.99436	1	19206	0	0.79623	0.0056467	0.019533	0.92813	406	4	0.79623	0.0323912
UGT2B11	4	0.99433	0.99435	1	19205	0	0.71974	0.0056659	0.019598	0.92813	407	4	0.71974	0.0323912
TMEM41A	4	0.66562	0.72453	1	13839	1	0.91875	0.0056753	0.019637	0.92813	408	3	0.91875	0.0323912
CES4A	4	0.90039	0.90063	1	17239	0	0.4681	0.0056954	0.019717	0.92813	409	3	0.4681	0.0323912
PCDHA6	4	0.30426	0.45928	1	8849	1	0.51884	0.0057023	0.019736	0.92813	410	2	0.51884	0.0323912
EN1	4	0.89881	0.89903	1	17210	0	0.81571	0.0057454	0.019867	0.92813	411	3	0.81571	0.0323912
CAB39L	4	0.084836	0.18991	0.964726	3804	2	-0.60315	0.0057468	0.019872	0.92813	412	1	-0.60315	0.015596
EPS8L1	4	0.99425	0.99427	1	19203	0	0.64168	0.0057549	0.019897	0.92813	413	4	0.64168	0.0323912
KCTD8	4	0.17943	0.3404	0.989562	6657	1	0.55864	0.0057982	0.020032	0.92813	414	3	0.55864	0.0323912
ATG2A	4	0.99419	0.99422	1	19202	0	0.43223	0.005814	0.020083	0.92813	415	4	0.43223	0.0323912
CBWD5	4	0.27335	0.42978	1	8279	2	-0.09453	0.0058358	0.020162	0.92813	416	2	-0.09453	0
TMEM44	4	0.69755	0.74178	1	14133	1	0.78335	0.0058441	0.020193	0.92813	417	3	0.78335	0.0323912
CXCL3	4	0.12261	0.25583	0.986463	5015	2	-0.16956	0.0058497	0.020212	0.92813	418	2	-0.16956	0.0059192
CLCN5	4	0.89613	0.89635	1	17154	0	0.4857	0.0058543	0.020226	0.92813	419	2	0.4857	0.0323912
ASAP3	4	0.79503	0.8045	1	15361	1	0.75316	0.0058636	0.020258	0.92813	420	3	0.75316	0.0323912
DHRS1	4	0.99414	0.99416	1	19201	0	0.71346	0.0058647	0.020262	0.92813	421	4	0.71346	0.0323912
FAM214A	4	0.31201	0.46668	1	8978	2	0.19848	0.0058682	0.020275	0.92813	422	2	0.19848	0.0323912
SEC24A	4	0.093939	0.20619	0.971248	4097	2	0.12269	0.0059011	0.020383	0.930868	423	2	0.12269	0.0311119
NDUFC1	4	0.99406	0.99409	1	19200	0	0.44733	0.0059356	0.020505	0.932699	424	4	0.44733	0.0302585
CT45A1	2	0.99406	0.99406	1	19199	0	0.84819	0.005942	0.011485	0.877523	425	2	0.84819	0.0567415
S100A10	4	0.59178	0.68907	1	13158	1	0.30709	0.0059525	0.020555	0.932699	426	2	0.30709	0.0302585
TUBB3	4	0.99404	0.99407	1	19198	0	0.69955	0.0059572	0.020567	0.932699	427	4	0.69955	0.0302585
TOE1	4	0.11283	0.23918	0.982397	4713	2	-0.34432	0.0060553	0.020906	0.942763	428	1	-0.34432	0.00771297
KLHL9	4	0.75996	0.77967	1	14873	1	0.70543	0.0060947	0.02104	0.942763	429	3	0.70543	0.0255975
TUBGCP3	4	0.70088	0.74368	1	14176	1	-0.13633	0.0061068	0.021079	0.942763	430	1	-0.13633	0
LMAN1	4	0.82063	0.82464	1	15741	1	1.0653	0.006114	0.021099	0.942763	431	3	1.0653	0.0255975
MAP1LC3B2	4	0.99388	0.9939	1	19197	0	0.42729	0.0061183	0.021111	0.942763	432	4	0.42729	0.0255975
NCR1	4	0.010214	0.034171	0.907737	704	1	0.51974	0.0061356	0.021167	0.942763	433	2	0.51974	0.0255975
USP39	4	0.99386	0.99388	1	19196	0	0.68067	0.0061364	0.021171	0.942763	434	4	0.68067	0.0255975
WARS2	4	0.93688	0.93712	1	17979	0	0.6427	0.0061498	0.021209	0.942763	435	2	0.6427	0.0255975
MLLT3	4	0.8919	0.89208	1	17076	0	0.47874	0.0061582	0.021227	0.942763	436	2	0.47874	0.0255975
TENM1	4	0.99383	0.99384	1	19195	0	0.63205	0.006175	0.021278	0.942871	437	4	0.63205	0.0255477
GLTSCR2	4	0.8716	0.87191	1	16645	0	0.86267	0.0062031	0.021354	0.942873	438	3	0.86267	0.0255468
NRP2	4	0.95153	0.95179	1	18294	0	0.74594	0.0062187	0.021407	0.942873	439	3	0.74594	0.0255468
ROR1	4	0.99377	0.99377	1	19193	0	0.70271	0.0062344	0.021451	0.942873	440	4	0.70271	0.0255468
SF3B5	4	0.99376	0.99376	1	19192	0	0.95197	0.0062424	0.021473	0.942873	441	4	0.95197	0.0255468
ARMC5	4	0.98526	0.98536	1	18983	0	0.63112	0.006261	0.021528	0.943159	442	3	0.63112	0.0254151
PHF5A	4	0.88587	0.88608	1	16947	0	1.0294	0.0063124	0.021705	0.9456	443	3	1.0294	0.0242925
HPRT1	4	0.90849	0.90878	1	17377	0	0.76157	0.0063245	0.021744	0.9456	444	3	0.76157	0.0242925
FGG	4	0.99367	0.99367	1	19191	0	0.44251	0.0063312	0.021769	0.9456	445	4	0.44251	0.0242925
BSPH1	4	0.99366	0.99366	1	19190	0	0.60053	0.0063358	0.021786	0.9456	446	4	0.60053	0.0242925
GLP1R	4	0.9892	0.98919	1	19075	0	0.91076	0.0063602	0.021866	0.9456	447	3	0.91076	0.0242925
Control_213	4	0.32423	0.47835	1	9196	1	0.15256	0.0063638	0.021877	0.9456	448	1	0.15256	0.0242925
SLIRP	4	0.96547	0.96567	1	18568	0	0.68888	0.0064345	0.0221	0.948318	449	3	0.68888	0.023046
FAM132B	4	0.24931	0.40693	1	7864	2	0.38728	0.0064473	0.022145	0.948318	450	2	0.38728	0.023046
ADAMTS4	4	0.99228	0.99228	1	19153	0	0.92378	0.0064619	0.022186	0.948318	451	4	0.92378	0.023046
POLR2K	4	0.39994	0.55072	1	10570	1	0.8508	0.0064794	0.022255	0.948318	452	3	0.8508	0.023046
CDKN1C	4	0.9102	0.91052	1	17410	0	0.61351	0.0064911	0.022292	0.948318	453	2	0.61351	0.023046
RBFA	4	0.45992	0.60877	1	11655	1	0.74886	0.0064954	0.022305	0.948318	454	3	0.74886	0.023046
PCDHAC2	4	0.9935	0.99349	1	19189	0	0.80313	0.0065045	0.022332	0.948318	455	4	0.80313	0.023046
VHL	4	0.93501	0.93529	1	17946	0	0.15245	0.006518	0.022388	0.948318	456	1	0.15245	0.023046
AP1M1	4	0.97132	0.97152	1	18689	0	0.9203	0.0065537	0.022506	0.948318	457	3	0.9203	0.023046
LDLRAD2	4	0.45904	0.60788	1	11642	1	0.78325	0.0065608	0.02253	0.948318	458	3	0.78325	0.023046
DAZL	4	0.75663	0.77751	1	14834	1	0.24534	0.0065694	0.022563	0.948318	459	2	0.24534	0.023046
EIF3M	4	0.96858	0.96879	1	18634	0	0.80734	0.0065719	0.022568	0.948318	460	3	0.80734	0.023046
HMGCLL1	4	0.065697	0.15508	0.964726	3096	1	0.89602	0.00658	0.022591	0.948318	461	3	0.89602	0.023046
RCHY1	4	0.9205	0.92079	1	17657	0	0.61364	0.0066208	0.022722	0.948318	462	3	0.61364	0.023046
EIF2S2	4	0.99337	0.99338	1	19184	0	0.61967	0.006626	0.022739	0.948318	463	4	0.61967	0.023046
BAG2	4	0.99337	0.99338	1	19183	0	0.49359	0.006629	0.02275	0.948318	464	4	0.49359	0.023046
WLS	4	0.88458	0.88482	1	16912	0	0.87168	0.0066571	0.022844	0.948318	465	3	0.87168	0.023046
ZIC3	4	0.99333	0.99333	1	19182	0	0.47532	0.0066693	0.022889	0.948318	466	4	0.47532	0.023046
SLC26A4	4	0.66854	0.72599	1	13868	1	0.37361	0.0067236	0.023068	0.948318	467	3	0.37361	0.023046
CLEC4G	4	0.9888	0.9888	1	19061	0	0.77047	0.0067245	0.02307	0.948318	468	3	0.77047	0.023046
DDX18	4	0.97131	0.9715	1	18687	0	0.86938	0.0067565	0.023181	0.948318	469	3	0.86938	0.023046
GNRHR	4	0.98843	0.98844	1	19050	0	0.64336	0.0067714	0.023229	0.948318	470	3	0.64336	0.023046
FAM170B	4	0.86055	0.86092	1	16414	1	0.36148	0.006775	0.023247	0.948318	471	2	0.36148	0.023046
FSTL3	4	0.99322	0.99322	1	19181	0	0.50414	0.006776	0.023252	0.948318	472	4	0.50414	0.023046
UCP2	4	0.99322	0.99321	1	19180	0	0.60814	0.0067772	0.023254	0.948318	473	4	0.60814	0.023046
ZNF236	4	0.54928	0.67067	1	12828	1	0.10542	0.0068062	0.023348	0.948318	474	2	0.10542	0.023046
ZNF217	4	0.612	0.69831	1	13338	1	0.61482	0.0068261	0.023415	0.948318	475	2	0.61482	0.023046
MAPRE2	4	0.20818	0.36782	0.99447	7158	2	-0.33109	0.0068264	0.023416	0.948318	476	2	-0.33109	0.00240831
ACMSD	4	0.99314	0.99314	1	19179	0	0.36319	0.0068587	0.023525	0.948318	477	4	0.36319	0.023046
OR2A5	4	0.99313	0.99314	1	19178	0	0.41048	0.0068655	0.023537	0.948318	478	4	0.41048	0.023046
SRP19	4	0.19328	0.35356	0.991925	6891	2	0.23717	0.0068761	0.02357	0.948318	479	2	0.23717	0.023046
OR1J2	4	0.0014498	0.005256	0.831643	120	2	-0.85642	0.0068778	0.023574	0.948318	480	1	-0.85642	0.0800631
PCDHB7	4	0.025849	0.078097	0.937554	1605	3	-1.2059	0.0069291	0.023753	0.948318	481	1	-1.2059	0.0280037
CLTB	4	0.27634	0.43259	1	8341	2	-0.01078	0.0069805	0.023916	0.948318	482	2	-0.01078	0
C17orf51	4	0.9862	0.98627	1	19002	0	0.73642	0.006988	0.023939	0.948318	483	3	0.73642	0.023046
ABCA4	4	0.99297	0.99297	1	19177	0	0.5338	0.0070271	0.024065	0.948318	484	4	0.5338	0.023046
AIP	4	0.99294	0.99294	1	19176	0	0.54593	0.007056	0.024156	0.948318	485	4	0.54593	0.023046
HIST1H2BO	4	0.76172	0.78081	1	14899	1	0.62749	0.0070809	0.02424	0.948318	486	3	0.62749	0.023046
SNX11	4	0.034387	0.095293	0.939418	1952	1	0.19175	0.0070833	0.024248	0.948318	487	1	0.19175	0.023046
MTPAP	4	0.19556	0.35575	0.991925	6933	1	0.75781	0.0070878	0.024263	0.948318	488	3	0.75781	0.023046
NOL10	4	0.9929	0.9929	1	19175	0	0.75179	0.0070988	0.0243	0.948318	489	4	0.75179	0.023046
TUBGCP2	4	0.9929	0.9929	1	19174	0	0.6948	0.0071039	0.024311	0.948318	490	4	0.6948	0.023046
FNDC5	4	0.13347	0.27414	0.986466	5370	1	-7.88e-05	0.0071347	0.024408	0.948318	491	1	-7.88e-05	0.00591788
RPL7A	4	0.7684	0.78534	1	14975	1	0.79297	0.0071361	0.024413	0.948318	492	3	0.79297	0.023046
RPS13	4	0.99286	0.99285	1	19173	0	0.84393	0.0071444	0.02444	0.948318	493	4	0.84393	0.023046
UTP20	4	0.99285	0.99284	1	19172	0	0.7087	0.007152	0.024472	0.948318	494	4	0.7087	0.023046
CD40LG	4	0.88503	0.88526	1	16927	0	0.81213	0.0071539	0.024476	0.948318	495	3	0.81213	0.023046
METTL12	4	0.84535	0.84622	1	16162	1	0.52835	0.0071641	0.024511	0.948318	496	2	0.52835	0.023046
FCAMR	4	0.90102	0.90129	1	17252	0	0.6183	0.0071794	0.024564	0.948318	497	2	0.6183	0.023046
CPA1	4	0.91594	0.91627	1	17541	0	0.74727	0.007183	0.024573	0.948318	498	3	0.74727	0.023046
MPC2	4	0.91931	0.91961	1	17620	0	0.45455	0.007186	0.02458	0.948318	499	2	0.45455	0.023046
SLC51B	4	0.99276	0.99276	1	19171	0	0.72166	0.0072375	0.024741	0.948318	500	4	0.72166	0.023046
CA8	4	0.99274	0.99274	1	19170	0	0.42539	0.0072555	0.024799	0.948318	501	4	0.42539	0.023046
NCBP1	4	0.65887	0.72108	1	13770	1	0.63144	0.0072562	0.024801	0.948318	502	2	0.63144	0.023046
PSMA2	4	0.98884	0.98883	1	19062	0	0.66946	0.0072888	0.024897	0.948318	503	3	0.66946	0.023046
KCNH8	4	0.99271	0.9927	1	19168	0	0.46856	0.0072889	0.024898	0.948318	504	4	0.46856	0.023046
ZNF593	4	0.99271	0.9927	1	19167	0	0.61069	0.0072941	0.024914	0.948318	505	4	0.61069	0.023046
FOXD2	4	0.96405	0.9643	1	18540	0	0.72616	0.0073056	0.024952	0.948318	506	3	0.72616	0.023046
ASF1B	4	0.9606	0.96085	1	18480	0	0.68717	0.0073128	0.024974	0.948318	507	3	0.68717	0.023046
TTC1	4	0.99269	0.99268	1	19166	0	0.51919	0.0073147	0.024982	0.948318	508	4	0.51919	0.023046
RPLP2	4	0.85217	0.85275	1	16280	1	0.75201	0.0073305	0.025034	0.948318	509	3	0.75201	0.023046
POGLUT1	4	0.38182	0.5332	1	10256	2	-1.9267	0.0073438	0.025085	0.948318	510	2	-1.9267	0
PAK6	4	0.99265	0.99264	1	19165	0	0.48017	0.007351	0.025108	0.948318	511	4	0.48017	0.023046
SNX17	4	0.18808	0.3486	0.991925	6805	1	0.94714	0.0073619	0.02514	0.948318	512	3	0.94714	0.023046
FKTN	4	0.46339	0.61212	1	11717	1	0.67186	0.0073799	0.025198	0.948318	513	3	0.67186	0.023046
MTNR1A	4	0.62218	0.70314	1	13430	1	0.15752	0.0073915	0.025234	0.948318	514	2	0.15752	0.023046
TGFBR1	4	0.85372	0.85421	1	16308	1	0.44158	0.0074058	0.02528	0.948318	515	2	0.44158	0.023046
CSTF2	4	0.25677	0.41392	1	7983	2	0.10954	0.0074162	0.025315	0.948318	516	2	0.10954	0.023046
OR13J1	4	0.99257	0.99257	1	19164	0	0.80298	0.0074278	0.025359	0.948318	517	4	0.80298	0.023046
Control_30	4	0.99177	0.9918	1	19136	0	0.76916	0.007436	0.025383	0.948318	518	4	0.76916	0.023046
FAM208A	4	0.99251	0.99251	1	19163	0	0.79582	0.0074907	0.025572	0.948318	519	4	0.79582	0.023046
GPRIN3	4	0.036072	0.098573	0.939441	2030	3	-0.78336	0.0074942	0.025585	0.948318	520	1	-0.78336	0.0271305
LEF1	4	0.9925	0.9925	1	19162	0	0.52217	0.0075038	0.02561	0.948318	521	4	0.52217	0.023046
TMEM35	4	0.99249	0.99249	1	19161	0	0.69998	0.0075065	0.025619	0.948318	522	4	0.69998	0.023046
ANXA5	4	0.99249	0.99249	1	19160	0	0.63872	0.0075078	0.025623	0.948318	523	4	0.63872	0.023046
SMARCE1	4	0.16272	0.32187	0.986466	6312	2	-0.49675	0.0075456	0.025743	0.948318	524	1	-0.49675	0.00591788
PRSS3	4	0.99244	0.99245	1	19159	0	0.51628	0.0075593	0.025783	0.948318	525	4	0.51628	0.023046
TMEM200C	4	0.47355	0.62208	1	11905	1	-0.018652	0.007597	0.025914	0.948318	526	1	-0.018652	0
KCND3	4	0.9924	0.9924	1	19158	0	0.41204	0.0076038	0.025935	0.948318	527	4	0.41204	0.023046
TMSB15A	4	0.84531	0.84619	1	16161	1	0.74639	0.0076078	0.025946	0.948318	528	3	0.74639	0.023046
TNFRSF10B	4	0.85712	0.85754	1	16363	1	0.65209	0.0076389	0.026044	0.948318	529	3	0.65209	0.023046
FTH1	4	0.99233	0.99234	1	19157	0	0.63671	0.0076671	0.02613	0.948318	530	4	0.63671	0.023046
BAG1	4	0.99232	0.99232	1	19156	0	0.58756	0.0076752	0.026155	0.948318	531	4	0.58756	0.023046
NRGN	4	0.64128	0.71231	1	13600	1	0.019111	0.0076997	0.026229	0.948318	532	2	0.019111	0.023046
MEP1B	4	0.99228	0.99228	1	19154	0	0.5695	0.0077181	0.026284	0.948318	533	4	0.5695	0.023046
DACT1	4	0.11999	0.25143	0.984869	4937	1	0.73776	0.0077215	0.026299	0.948318	534	3	0.73776	0.023046
SYT10	4	0.48739	0.63542	1	12175	1	0.72167	0.0077282	0.02632	0.948318	535	3	0.72167	0.023046
SLC27A1	4	0.99226	0.99227	1	19152	0	0.63007	0.007739	0.026355	0.948318	536	4	0.63007	0.023046
TPST1	4	0.82633	0.82945	1	15824	1	0.75335	0.0077461	0.026379	0.948318	537	3	0.75335	0.023046
ADGRL4	4	0.99225	0.99226	1	19151	0	0.57518	0.0077478	0.026386	0.948318	538	4	0.57518	0.023046
CCDC184	4	0.99225	0.99225	1	19150	0	0.41232	0.0077525	0.026397	0.948318	539	4	0.41232	0.023046
TMEM211	4	0.99219	0.9922	1	19149	0	0.64011	0.0078059	0.02657	0.95195	540	4	0.64011	0.0213859
BUB1B	4	0.99219	0.9922	1	19148	0	0.88171	0.0078141	0.026596	0.95195	541	4	0.88171	0.0213859
CPA4	4	0.66487	0.72414	1	13831	1	0.37664	0.0078537	0.026726	0.954852	542	3	0.37664	0.0200639
PNO1	4	0.99211	0.99212	1	19145	0	0.70293	0.0078904	0.026835	0.955119	543	4	0.70293	0.0199425
ALDH3B1	4	0.9921	0.99211	1	19144	0	0.5373	0.0078999	0.026865	0.955119	544	4	0.5373	0.0199425
PRPF4	4	0.95167	0.95192	1	18300	0	0.71606	0.0079051	0.026882	0.955119	545	3	0.71606	0.0199425
ATP2B2	4	0.40859	0.55914	1	10733	1	0.71156	0.0079452	0.027004	0.955517	546	3	0.71156	0.0197616
WAPAL	4	0.99205	0.99206	1	19143	0	0.65899	0.0079493	0.027019	0.955517	547	4	0.65899	0.0197616
CSAG3	4	0.34211	0.49541	1	9511	1	0.45566	0.0079864	0.02713	0.955517	548	2	0.45566	0.0197616
RAD52	4	0.16233	0.32126	0.986466	6303	1	0.74095	0.0079918	0.027149	0.955517	549	3	0.74095	0.0197616
MCRS1	4	0.992	0.99201	1	19142	0	0.65931	0.0080031	0.027177	0.955517	550	4	0.65931	0.0197616
SSBP3	4	0.63784	0.71061	1	13567	1	0.65126	0.0080078	0.027194	0.955517	551	3	0.65126	0.0197616
CT45A7	4	0.49943	0.64715	1	12396	1	1.0545	0.0080294	0.027268	0.955517	552	3	1.0545	0.0197616
NGDN	4	0.71211	0.75003	1	14283	1	0.99217	0.0080368	0.027288	0.955517	553	3	0.99217	0.0197616
WSB2	4	0.73757	0.7654	1	14606	1	-0.038001	0.0080591	0.02735	0.955973	554	1	-0.038001	0
HSD17B12	4	0.9919	0.99192	1	19140	0	0.4674	0.0081045	0.027492	0.956234	555	4	0.4674	0.0194358
LSM5	4	0.22575	0.38456	0.998604	7453	1	0.82335	0.0081267	0.027562	0.956234	556	3	0.82335	0.0194358
HLA-DRB5	4	0.99187	0.9919	1	19139	0	0.47657	0.0081268	0.027562	0.956234	557	4	0.47657	0.0194358
GLT6D1	4	0.8806	0.88088	1	16823	0	0.81493	0.0081337	0.027587	0.956234	558	3	0.81493	0.0194358
CT45A3	4	0.99041	0.99043	1	19103	0	0.95534	0.0081483	0.027638	0.956234	559	4	0.95534	0.0194358
LOC101927844	4	0.99181	0.99183	1	19137	0	0.52261	0.0081885	0.027765	0.956234	560	4	0.52261	0.0194358
MYD88	4	0.84942	0.85011	1	16224	1	0.5136	0.0082131	0.027853	0.956234	561	3	0.5136	0.0194358
ITGA6	4	0.95966	0.95991	1	18457	0	0.68639	0.0082244	0.027886	0.956234	562	3	0.68639	0.0194358
NRF1	4	0.93026	0.93051	1	17853	0	0.83754	0.0082336	0.02792	0.956234	563	3	0.83754	0.0194358
ZNF41	4	0.051517	0.12844	0.960784	2588	2	0.12482	0.0082353	0.027928	0.956234	564	2	0.12482	0.0194358
MTMR8	4	0.98415	0.98429	1	18951	0	0.56747	0.0082644	0.028004	0.956234	565	3	0.56747	0.0194358
NAA15	4	0.92334	0.92365	1	17718	0	0.72214	0.0082954	0.0281	0.956234	566	3	0.72214	0.0194358
PCCB	4	0.41521	0.56553	1	10846	1	0.78432	0.0083063	0.028129	0.956234	567	3	0.78432	0.0194358
NPVF	4	0.12962	0.26765	0.986466	5238	1	0.60635	0.0083158	0.028159	0.956234	568	3	0.60635	0.0194358
PON1	4	0.61901	0.70161	1	13400	1	0.8081	0.008325	0.028192	0.956234	569	3	0.8081	0.0194358
HIRIP3	4	0.99167	0.99169	1	19135	0	0.38137	0.0083264	0.028201	0.956234	570	4	0.38137	0.0194358
CFAP97	4	0.99167	0.99168	1	19134	0	0.60397	0.0083329	0.028227	0.956234	571	4	0.60397	0.0194358
LRBA	4	0.35725	0.50978	1	9820	1	0.50236	0.0083831	0.028379	0.956234	572	2	0.50236	0.0194358
EXO5	4	0.99161	0.99162	1	19133	0	0.58683	0.0083943	0.02842	0.956234	573	4	0.58683	0.0194358
PRDM15	4	0.9427	0.94299	1	18096	0	0.95675	0.0084271	0.028518	0.956234	574	3	0.95675	0.0194358
TMEM33	4	0.99155	0.99156	1	19132	0	0.52029	0.0084503	0.028591	0.956234	575	4	0.52029	0.0194358
NCL	4	0.99155	0.99156	1	19131	0	0.71785	0.0084517	0.028593	0.956234	576	4	0.71785	0.0194358
TBATA	4	0.9479	0.94814	1	18216	0	0.6706	0.0084658	0.028643	0.956234	577	3	0.6706	0.0194358
YTHDC1	4	0.98561	0.9857	1	18987	0	0.87636	0.0084691	0.028658	0.956234	578	3	0.87636	0.0194358
ARHGEF10L	4	0.30149	0.45666	1	8796	2	0.12334	0.0084698	0.028659	0.956234	579	2	0.12334	0.0194358
CNOT11	4	0.99152	0.99153	1	19130	0	0.70461	0.008482	0.028694	0.956234	580	4	0.70461	0.0194358
ALPI	4	0.99151	0.99152	1	19129	0	0.4439	0.0084921	0.028731	0.956234	581	4	0.4439	0.0194358
F8A2	4	0.99148	0.9915	1	19128	0	0.53329	0.0085153	0.02881	0.956234	582	4	0.53329	0.0194358
PTP4A2	4	0.29525	0.45065	1	8665	1	0.73652	0.0085211	0.028829	0.956234	583	3	0.73652	0.0194358
PLP1	4	0.9903	0.99033	1	19101	0	0.66498	0.0085239	0.028839	0.956234	584	4	0.66498	0.0194358
KRT73	4	0.72096	0.7553	1	14379	1	0.2453	0.0085724	0.028991	0.959643	585	2	0.2453	0.0178903
OR6K2	4	0.9831	0.98324	1	18935	0	0.69359	0.0085932	0.029059	0.960214	586	3	0.69359	0.017632
MAPKAPK5	4	0.99136	0.99137	1	19125	0	0.58405	0.0086434	0.029213	0.960214	587	4	0.58405	0.017632
ARHGEF25	4	0.90706	0.90737	1	17361	0	0.3716	0.008675	0.029313	0.960214	588	2	0.3716	0.017632
KRTAP10-9	4	0.1974	0.35752	0.991925	6974	2	0.37414	0.008716	0.029452	0.960214	589	2	0.37414	0.017632
FANCD2	4	0.99127	0.99128	1	19123	0	0.65001	0.0087331	0.029504	0.960214	590	4	0.65001	0.017632
BAX	4	0.81519	0.82022	1	15669	1	0.77927	0.0087573	0.02959	0.960214	591	3	0.77927	0.017632
GBF1	4	0.17769	0.33872	0.989562	6626	1	1.0386	0.0087597	0.029599	0.960214	592	3	1.0386	0.017632
AP1B1	4	0.27375	0.43018	1	8287	1	0.7284	0.0087692	0.029639	0.960214	593	2	0.7284	0.017632
ATXN7L3B	4	0.85155	0.85213	1	16267	1	0.76109	0.0087865	0.029702	0.960214	594	3	0.76109	0.017632
MMRN1	4	0.9912	0.99122	1	19122	0	0.46269	0.0087952	0.029724	0.960214	595	4	0.46269	0.017632
C1orf177	4	0.98908	0.98907	1	19068	0	0.8353	0.0088328	0.029836	0.960214	596	3	0.8353	0.017632
TSPAN1	4	0.99116	0.99117	1	19121	0	0.49107	0.0088442	0.02987	0.960214	597	4	0.49107	0.017632
PRSS46	4	0.99115	0.99116	1	19120	0	0.4963	0.008851	0.029892	0.960214	598	4	0.4963	0.017632
GAB1	4	0.99114	0.99114	1	19119	0	0.68237	0.0088621	0.029927	0.960214	599	4	0.68237	0.017632
SRRD	4	0.70847	0.74794	1	14247	1	0.61578	0.0088803	0.029992	0.960214	600	3	0.61578	0.017632
PRPF40A	4	0.99062	0.99065	1	19108	0	0.71869	0.0089111	0.030093	0.960214	601	4	0.71869	0.017632
TUBA3E	4	0.98698	0.98699	1	19020	0	0.65592	0.0089316	0.030154	0.960214	602	3	0.65592	0.017632
DGCR14	4	0.78087	0.79406	1	15153	1	0.95166	0.0089583	0.030247	0.960214	603	3	0.95166	0.017632
YAF2	4	0.24428	0.40209	1	7760	2	0.13001	0.0089639	0.030264	0.960214	604	2	0.13001	0.017632
ANXA9	4	0.99103	0.99104	1	19118	0	0.53946	0.0089731	0.030292	0.960214	605	4	0.53946	0.017632
SF3A1	4	0.9573	0.95751	1	18400	0	1.0541	0.0089923	0.030351	0.960214	606	3	1.0541	0.017632
Control_204	4	0.99099	0.991	1	19116	0	0.59666	0.009013	0.030414	0.960214	607	4	0.59666	0.017632
TNKS2	4	0.36007	0.51243	1	9876	1	0.77922	0.0090265	0.030463	0.960214	608	3	0.77922	0.017632
CYP19A1	4	0.86144	0.86178	1	16436	0	0.41541	0.0090321	0.03048	0.960214	609	2	0.41541	0.017632
PRKD2	4	0.88172	0.88201	1	16849	0	0.17959	0.0090342	0.03049	0.960214	610	2	0.17959	0.017632
DEFB131	4	0.99096	0.99098	1	19115	0	0.48587	0.0090425	0.030519	0.960214	611	4	0.48587	0.017632
IFI44	4	0.16403	0.32388	0.986466	6351	2	0.073914	0.0090492	0.030536	0.960214	612	2	0.073914	0.017632
GJD4	4	0.99094	0.99097	1	19114	0	0.44868	0.0090592	0.030571	0.960214	613	4	0.44868	0.017632
PBOV1	4	0.32231	0.47649	1	9161	2	0.34287	0.009072	0.030609	0.960214	614	2	0.34287	0.017632
SLC25A10	4	0.34029	0.49364	1	9477	1	0.60813	0.0090855	0.030648	0.960214	615	3	0.60813	0.017632
HS6ST3	4	0.27332	0.42976	1	8277	2	0.22425	0.0090892	0.030658	0.960214	616	2	0.22425	0.017632
PDGFRA	4	0.9909	0.99092	1	19113	0	0.49363	0.0091048	0.030713	0.960214	617	4	0.49363	0.017632
HERC4	4	0.30114	0.45632	1	8788	2	0.22013	0.0091235	0.030776	0.960214	618	2	0.22013	0.017632
U2AF1	4	0.99086	0.99089	1	19112	0	0.73031	0.0091353	0.030818	0.960214	619	4	0.73031	0.017632
DYRK2	4	0.44984	0.59892	1	11489	2	-0.1728	0.0091368	0.030822	0.960214	620	1	-0.1728	0
LRRN4CL	4	0.47144	0.61996	1	11863	1	0.56934	0.0091406	0.030839	0.960214	621	2	0.56934	0.017632
GDI1	4	0.88939	0.88956	1	17015	0	0.7496	0.0091521	0.030878	0.960214	622	3	0.7496	0.017632
EIF4G1	4	0.70801	0.74768	1	14242	1	0.47332	0.009175	0.030951	0.960214	623	2	0.47332	0.017632
FAM89A	4	0.18976	0.35023	0.991925	6829	1	-0.17282	0.0091881	0.030991	0.960214	624	1	-0.17282	0.00352116
CD3E	4	0.65211	0.71768	1	13704	1	0.7277	0.0091887	0.030993	0.960214	625	3	0.7277	0.017632
MIA3	4	0.88191	0.88221	1	16854	0	0.68184	0.0092137	0.031067	0.960214	626	3	0.68184	0.017632
SPHK1	4	0.99078	0.9908	1	19111	0	0.62357	0.009221	0.031091	0.960214	627	4	0.62357	0.017632
H2BFM	4	0.99073	0.99075	1	19110	0	0.56997	0.0092688	0.031242	0.963321	628	4	0.56997	0.016229
PSMB7	4	0.96605	0.96626	1	18583	0	1.1039	0.0093016	0.031353	0.963974	629	3	1.1039	0.0159347
DEGS1	4	0.91817	0.91846	1	17590	0	0.6457	0.0093132	0.03139	0.963974	630	3	0.6457	0.0159347
CSF1	4	0.14804	0.29823	0.986466	5828	1	0.68692	0.009342	0.03147	0.963974	631	3	0.68692	0.0159347
MAB21L2	4	0.88415	0.88442	1	16904	0	0.76461	0.009371	0.031576	0.963974	632	3	0.76461	0.0159347
MCUR1	4	0.84545	0.84632	1	16164	1	0.57028	0.0093933	0.031651	0.963974	633	3	0.57028	0.0159347
MIA2	4	0.26144	0.41841	1	8061	1	0.74807	0.0094005	0.031675	0.963974	634	3	0.74807	0.0159347
MAT2A	4	0.41695	0.56718	1	10878	2	0.21239	0.0094581	0.031855	0.963974	635	2	0.21239	0.0159347
AKR1C1	4	0.9844	0.98454	1	18958	0	0.55874	0.0094603	0.031864	0.963974	636	3	0.55874	0.0159347
NRBP1	4	0.99054	0.99057	1	19107	0	0.51151	0.0094616	0.031868	0.963974	637	4	0.51151	0.0159347
PEX11G	4	0.99051	0.99054	1	19106	0	0.51253	0.0094867	0.031938	0.963974	638	4	0.51253	0.0159347
CITED1	4	0.9905	0.99053	1	19105	0	0.42782	0.0094977	0.031969	0.963974	639	4	0.42782	0.0159347
PIEZO2	4	0.33885	0.49228	1	9458	1	0.1256	0.0095471	0.032132	0.963974	640	1	0.1256	0.0159347
CLC	4	0.99045	0.99047	1	19104	0	0.71895	0.0095528	0.03215	0.963974	641	4	0.71895	0.0159347
ASCC2	4	0.98567	0.98577	1	18990	0	0.74944	0.0095716	0.032215	0.963974	642	3	0.74944	0.0159347
MATK	4	0.37094	0.52277	1	10084	1	-0.088011	0.0095984	0.032289	0.963974	643	1	-0.088011	0
NOC4L	4	0.47989	0.62823	1	12032	1	0.86998	0.0096437	0.032432	0.963974	644	3	0.86998	0.0159347
FAM76A	4	0.97554	0.97574	1	18787	0	0.15161	0.0096497	0.032456	0.963974	645	1	0.15161	0.0159347
OSR1	4	0.52858	0.66232	1	12672	1	0.31074	0.009701	0.03261	0.963974	646	2	0.31074	0.0159347
SAMD7	4	0.9903	0.99033	1	19100	0	0.40984	0.0097036	0.032618	0.963974	647	4	0.40984	0.0159347
ZNF280B	4	0.99026	0.99029	1	19099	0	0.46545	0.009742	0.032739	0.963974	648	4	0.46545	0.0159347
POU3F4	4	0.97647	0.97668	1	18803	0	0.6892	0.0097447	0.032745	0.963974	649	3	0.6892	0.0159347
PPRC1	4	0.94767	0.94789	1	18209	0	0.6208	0.0097452	0.032747	0.963974	650	2	0.6208	0.0159347
KLHL21	4	0.4167	0.56695	1	10874	2	-0.28881	0.0097522	0.032765	0.963974	651	1	-0.28881	0
ESF1	4	0.99024	0.99027	1	19098	0	0.64059	0.009758	0.032785	0.963974	652	4	0.64059	0.0159347
RPSA	4	0.88549	0.88571	1	16936	0	1.0043	0.0097786	0.032842	0.963974	653	3	1.0043	0.0159347
XYLT2	4	0.0050831	0.01767	0.907737	372	2	-0.76114	0.0097806	0.03285	0.963974	654	2	-0.76114	0.04204
CWC15	4	0.99014	0.99015	1	19096	0	0.81049	0.009789	0.03288	0.963974	655	4	0.81049	0.0159347
HSPB3	4	0.8054	0.81247	1	15518	1	0.61294	0.0098177	0.032959	0.963974	656	3	0.61294	0.0159347
AGTR2	4	0.66389	0.72364	1	13823	1	0.68112	0.0098203	0.032965	0.963974	657	3	0.68112	0.0159347
PABPC1L2A	4	0.99016	0.99018	1	19097	0	0.53788	0.0098433	0.033037	0.963974	658	4	0.53788	0.0159347
SORCS1	4	0.95005	0.95026	1	18267	0	0.85273	0.00987	0.033116	0.963974	659	3	0.85273	0.0159347
IRAK1	4	0.30454	0.45955	1	8854	1	0.78599	0.0098754	0.033136	0.963974	660	3	0.78599	0.0159347
PSMB1	4	0.85597	0.85643	1	16340	1	0.96522	0.0098873	0.033171	0.963974	661	3	0.96522	0.0159347
GAGE2B	4	0.9273	0.92757	1	17796	0	0.66628	0.009891	0.033185	0.963974	662	3	0.66628	0.0159347
HDDC3	4	0.9901	0.99011	1	19095	0	0.51349	0.0099016	0.033218	0.963974	663	4	0.51349	0.0159347
GATB	4	0.54311	0.66812	1	12779	1	0.70949	0.0099041	0.033225	0.963974	664	3	0.70949	0.0159347
FANCM	4	0.71605	0.75232	1	14324	1	0.51154	0.009906	0.033228	0.963974	665	2	0.51154	0.0159347
OR10AG1	4	0.79135	0.80174	1	15308	1	0.81216	0.0099111	0.033242	0.963974	666	3	0.81216	0.0159347
ZNF354A	4	0.99009	0.9901	1	19094	0	0.4448	0.0099145	0.033253	0.963974	667	4	0.4448	0.0159347
OR6X1	4	0.9677	0.96791	1	18615	0	0.56925	0.0099349	0.033309	0.963974	668	2	0.56925	0.0159347
PLD4	4	0.98056	0.98078	1	18890	0	0.95858	0.0099514	0.033359	0.963974	669	3	0.95858	0.0159347
ST7L	4	0.021391	0.067754	0.927324	1413	2	-0.54726	0.0099573	0.033378	0.963974	670	1	-0.54726	0.0327685
C1orf229	4	0.59462	0.69036	1	13186	1	0.68329	0.0099647	0.033404	0.963974	671	2	0.68329	0.0159347
CLDN5	4	0.37584	0.52747	1	10156	2	0.13227	0.010009	0.033548	0.964078	672	2	0.13227	0.0158878
RAD18	4	0.92307	0.92338	1	17705	0	0.59917	0.010024	0.033598	0.964078	673	2	0.59917	0.0158878
ADGRG1	4	0.32134	0.4756	1	9133	1	0.72937	0.010036	0.033628	0.964078	674	3	0.72937	0.0158878
HIVEP3	4	0.97256	0.97278	1	18717	0	0.69668	0.010042	0.033644	0.964078	675	3	0.69668	0.0158878
CDC37L1	4	0.98108	0.98127	1	18904	0	0.69712	0.010057	0.033691	0.964078	676	3	0.69712	0.0158878
ANKRD36	4	0.21977	0.37884	0.998357	7346	1	0.86779	0.010078	0.033757	0.964078	677	3	0.86779	0.0158878
HBA2	4	0.9113	0.91163	1	17440	0	0.78631	0.010084	0.033778	0.964078	678	3	0.78631	0.0158878
THOC2	4	0.3235	0.47763	1	9184	1	0.81534	0.010094	0.033805	0.964078	679	3	0.81534	0.0158878
FOXL1	4	0.042525	0.11121	0.955377	2254	2	-1.7723	0.010111	0.033857	0.964116	680	2	-1.7723	0.0198252
RAD51C	4	0.36449	0.51667	1	9959	2	0.37629	0.010132	0.03393	0.964794	681	2	0.37629	0.0155654
ZHX1	4	0.81332	0.81871	1	15644	1	0.20493	0.010162	0.034009	0.965615	682	2	0.20493	0.015196
ARFIP2	4	0.77123	0.78724	1	15016	1	0.95077	0.010233	0.034235	0.96771	683	3	0.95077	0.0142548
VMP1	4	0.98977	0.98976	1	19093	0	0.36762	0.010233	0.034235	0.96771	684	4	0.36762	0.0142548
H2AFB3	4	0.98976	0.98975	1	19092	0	0.41798	0.010245	0.034274	0.96771	685	4	0.41798	0.0142548
EYA4	4	0.2214	0.3804	0.998357	7370	1	0.38887	0.010265	0.034318	0.96771	686	3	0.38887	0.0142548
DLL4	4	0.56692	0.6782	1	12957	1	0.91114	0.010271	0.034333	0.96771	687	3	0.91114	0.0142548
SF3B2	4	0.2013	0.36128	0.992741	7040	1	0.88605	0.010335	0.03446	0.96904	688	3	0.88605	0.0136583
FLJ44635	4	0.93718	0.93743	1	17987	0	0.74747	0.010343	0.03448	0.96904	689	3	0.74747	0.0136583
FCGR3A	4	0.059067	0.14263	0.964726	2852	3	-0.61596	0.010367	0.034542	0.969386	690	1	-0.61596	0.015596
TEX13A	4	0.95577	0.95599	1	18372	0	0.5812	0.010422	0.03467	0.970647	691	3	0.5812	0.0129387
Control_195	4	0.9866	0.98663	1	19013	0	0.87474	0.010454	0.034744	0.970647	692	3	0.87474	0.0129387
TMEM8B	4	0.14934	0.30037	0.986466	5874	2	-0.51564	0.010459	0.034757	0.970647	693	2	-0.51564	0.00591788
NAP1L2	4	0.024538	0.075412	0.937554	1552	1	0.84492	0.010473	0.034788	0.970647	694	3	0.84492	0.0129387
PIGQ	4	0.97256	0.97277	1	18715	0	0.89168	0.010545	0.034948	0.972492	695	3	0.89168	0.012114
SKIV2L2	4	0.9713	0.97149	1	18686	0	1.1967	0.010563	0.034988	0.972492	696	3	1.1967	0.012114
TCEB3C	4	0.85469	0.85517	1	16319	1	0.084768	0.010572	0.035004	0.972492	697	1	0.084768	0.012114
HLA-C	4	0.065225	0.1542	0.964726	3081	2	-0.62048	0.010624	0.03512	0.972648	698	1	-0.62048	0.015596
ATF4	4	0.97858	0.9788	1	18838	0	0.76904	0.010631	0.03514	0.972648	699	3	0.76904	0.0120443
SUPT20HL1	4	0.91661	0.91695	1	17562	0	0.57237	0.010649	0.035184	0.972648	700	2	0.57237	0.0120443
LOC400736	4	0.95701	0.95721	1	18396	0	0.77157	0.010679	0.035258	0.972648	701	3	0.77157	0.0120443
ERLIN1	4	0.64475	0.714	1	13628	1	0.32886	0.010726	0.035372	0.972648	702	2	0.32886	0.0120443
RNF4	4	0.13055	0.26921	0.986466	5270	2	0.1824	0.010766	0.035459	0.972648	703	2	0.1824	0.0120443
NFX1	4	0.44426	0.59349	1	11388	1	0.72665	0.010803	0.035543	0.972648	704	2	0.72665	0.0120443
GABRA5	4	0.13856	0.28261	0.986466	5527	1	0.96837	0.010811	0.035561	0.972648	705	3	0.96837	0.0120443
ARL14EP	4	0.51642	0.65752	1	12582	1	0.33366	0.010829	0.035596	0.972648	706	2	0.33366	0.0120443
PROM2	4	0.78546	0.79741	1	15224	1	0.80749	0.010834	0.035608	0.972648	707	3	0.80749	0.0120443
BHLHB9	4	0.9878	0.98781	1	19036	0	0.68371	0.010856	0.035657	0.972648	708	3	0.68371	0.0120443
DEFB105A	4	0.96001	0.96025	1	18466	0	0.63765	0.010872	0.035697	0.972648	709	3	0.63765	0.0120443
RBM42	4	0.96397	0.96421	1	18537	0	0.71472	0.010887	0.035728	0.972648	710	3	0.71472	0.0120443
EIF3L	4	0.65541	0.71935	1	13732	1	0.67452	0.010928	0.035809	0.972648	711	2	0.67452	0.0120443
ZFP64	4	0.27013	0.4266	1	8215	1	0.53503	0.010937	0.035831	0.972648	712	3	0.53503	0.0120443
RBM17	4	0.38212	0.53349	1	10264	1	0.40713	0.010946	0.035851	0.972648	713	2	0.40713	0.0120443
2020-12-01	4	0.20648	0.3662	0.993904	7133	1	0.61823	0.010971	0.035914	0.972648	714	2	0.61823	0.0120443
FAM57B	4	0.40761	0.55818	1	10711	2	-0.15455	0.010982	0.035937	0.972648	715	1	-0.15455	0
CDC25B	4	0.46248	0.61127	1	11700	1	0.7309	0.011004	0.035991	0.972648	716	3	0.7309	0.0120443
TTC21B	4	0.012518	0.04133	0.907737	872	1	0.55832	0.011021	0.036039	0.972648	717	2	0.55832	0.0120443
USP48	4	0.39609	0.54694	1	10505	1	0.15927	0.011033	0.036065	0.972648	718	2	0.15927	0.0120443
SUN5	4	0.13282	0.273	0.986466	5348	2	0.087935	0.011096	0.036215	0.97533	719	2	0.087935	0.0108484
ACAA2	4	0.66087	0.72208	1	13790	1	0.73822	0.011171	0.036377	0.976548	720	3	0.73822	0.0103064
PHLDA3	4	0.4579	0.60679	1	11626	1	0.63316	0.011187	0.036413	0.976548	721	3	0.63316	0.0103064
REG1A	4	0.01737	0.056009	0.920133	1172	2	-0.074582	0.011191	0.03642	0.976548	722	2	-0.074582	0.0361494
PIWIL3	4	0.037854	0.10204	0.941449	2098	2	-0.072266	0.011228	0.036503	0.976548	723	2	-0.072266	0.0262032
ZIK1	4	0.49897	0.6467	1	12387	2	-0.20888	0.011238	0.036529	0.976548	724	1	-0.20888	0
AP3S1	4	0.2812	0.43726	1	8427	2	-0.22682	0.01129	0.036637	0.976548	725	1	-0.22682	0
COLGALT2	4	0.24422	0.40203	1	7758	1	0.59761	0.011299	0.036655	0.976548	726	3	0.59761	0.0103064
Control_229	4	0.32242	0.47661	1	9162	1	0.44299	0.011336	0.03674	0.976548	727	2	0.44299	0.0103064
YIPF4	4	0.54178	0.66759	1	12770	1	0.60994	0.011349	0.036771	0.976548	728	2	0.60994	0.0103064
EPHA5	4	0.7826	0.79534	1	15187	1	0.58345	0.011355	0.036784	0.976548	729	3	0.58345	0.0103064
NUMA1	4	0.56525	0.67749	1	12939	1	0.87038	0.011374	0.036829	0.976548	730	3	0.87038	0.0103064
OR52W1	4	0.45757	0.60649	1	11622	1	0.4194	0.011392	0.036865	0.976548	731	3	0.4194	0.0103064
ENAM	4	0.6926	0.73898	1	14093	1	0.18705	0.011443	0.036982	0.978298	732	2	0.18705	0.00952883
SCRN2	4	0.37929	0.53076	1	10214	1	0.63498	0.0115	0.037098	0.980043	733	3	0.63498	0.00875487
PEX1	4	0.16837	0.32987	0.98718	6469	2	-0.32551	0.011546	0.037212	0.980415	734	1	-0.32551	0.00560365
LANCL2	4	0.7078	0.74756	1	14239	1	0.4282	0.011565	0.037254	0.980415	735	2	0.4282	0.00859005
IQGAP2	4	0.0006455	0.0024346	0.746055	61	1	0.65292	0.011592	0.037315	0.980415	736	3	0.65292	0.00859005
HTR5A	4	0.9806	0.98082	1	18891	0	0.30615	0.011597	0.037331	0.980415	737	2	0.30615	0.00859005
ZNF547	4	0.24789	0.40557	1	7826	1	0.71828	0.011677	0.037485	0.980415	738	3	0.71828	0.00859005
METTL8	4	0.36834	0.52025	1	10032	1	0.13882	0.011699	0.037543	0.980415	739	1	0.13882	0.00859005
TLCD1	4	0.1631	0.32241	0.986466	6323	1	0.8719	0.0117	0.037544	0.980415	740	3	0.8719	0.00859005
TUSC5	4	0.012979	0.042718	0.907737	903	2	0.20896	0.01177	0.037715	0.980415	741	2	0.20896	0.00859005
ALDOA	4	0.93224	0.93251	1	17897	0	0.46826	0.011802	0.037782	0.980415	742	2	0.46826	0.00859005
CBY1	4	0.93926	0.93951	1	18032	0	0.70887	0.011802	0.037784	0.980415	743	3	0.70887	0.00859005
DAO	4	0.14096	0.28656	0.986466	5598	1	0.39381	0.011803	0.037785	0.980415	744	2	0.39381	0.00859005
ITGA3	4	0.93973	0.93999	1	18046	0	0.75138	0.011805	0.037794	0.980415	745	3	0.75138	0.00859005
RAP1GDS1	4	0.79702	0.80602	1	15398	1	0.39103	0.011853	0.037896	0.980415	746	3	0.39103	0.00859005
ACE	4	0.86796	0.86824	1	16569	0	0.46862	0.01188	0.037962	0.980415	747	2	0.46862	0.00859005
NUP35	4	0.069715	0.16256	0.964726	3246	1	0.75219	0.011953	0.038115	0.980415	748	3	0.75219	0.00859005
EPRS	4	0.91612	0.91645	1	17546	0	0.40054	0.011955	0.038122	0.980415	749	2	0.40054	0.00859005
LSM8	4	0.79169	0.802	1	15314	1	0.7242	0.011978	0.038171	0.980415	750	2	0.7242	0.00859005
HIST2H2BF	4	0.82032	0.82439	1	15736	1	0.16414	0.012006	0.038238	0.980415	751	1	0.16414	0.00859005
SERPINI1	4	0.944	0.94429	1	18129	0	0.63893	0.012013	0.038256	0.980415	752	3	0.63893	0.00859005
PPT2	4	0.98736	0.98737	1	19028	0	0.69377	0.012021	0.038272	0.980415	753	3	0.69377	0.00859005
MAP9	4	0.80001	0.80833	1	15437	1	0.5538	0.012048	0.038326	0.980415	754	3	0.5538	0.00859005
RFX4	4	0.48517	0.63333	1	12134	1	0.81667	0.012108	0.038458	0.980415	755	3	0.81667	0.00859005
UNC50	4	0.16729	0.32879	0.986466	6451	1	0.76158	0.012155	0.03857	0.980415	756	3	0.76158	0.00859005
ZC3HAV1L	4	0.046904	0.11972	0.956075	2417	2	-0.39809	0.01216	0.038584	0.980415	757	1	-0.39809	0.019508
SUCNR1	4	0.58512	0.68612	1	13102	1	0.75799	0.012188	0.038641	0.980415	758	3	0.75799	0.00859005
CCDC136	4	0.45198	0.60103	1	11529	1	0.32262	0.012211	0.038698	0.980415	759	2	0.32262	0.00859005
UST	4	0.95806	0.95829	1	18420	0	0.65749	0.012219	0.038715	0.980415	760	2	0.65749	0.00859005
DTX4	4	0.97984	0.98004	1	18874	0	0.7841	0.012259	0.038813	0.980415	761	3	0.7841	0.00859005
LRRC38	4	0.055099	0.13522	0.964726	2699	1	0.76956	0.012262	0.038821	0.980415	762	2	0.76956	0.00859005
ITSN2	4	0.75245	0.77481	1	14781	1	0.7729	0.012291	0.038883	0.980415	763	3	0.7729	0.00859005
PLXNB3	4	0.95885	0.95908	1	18440	0	0.80705	0.012299	0.038895	0.980415	764	3	0.80705	0.00859005
TSGA10	4	0.8912	0.89138	1	17055	0	0.44054	0.012313	0.038933	0.980415	765	2	0.44054	0.00859005
HPD	4	0.21575	0.375	0.997962	7273	2	-0.13968	0.012365	0.039058	0.980415	766	2	-0.13968	0.000885995
WDR74	4	0.92997	0.93021	1	17850	0	0.56608	0.012368	0.039064	0.980415	767	3	0.56608	0.00859005
C5orf46	4	0.54245	0.66784	1	12775	1	0.51937	0.012377	0.039081	0.980415	768	2	0.51937	0.00859005
ZNF468	4	0.98975	0.98975	1	19091	0	0.59225	0.012396	0.039119	0.980415	769	3	0.59225	0.00859005
IFIT1	4	0.83905	0.8405	1	16047	1	-0.085532	0.012416	0.039168	0.980415	770	1	-0.085532	0
PEX6	4	0.83414	0.83612	1	15957	1	0.030917	0.012467	0.03929	0.980415	771	1	0.030917	0.00859005
RAB33B	4	0.96715	0.96738	1	18605	0	0.58685	0.012472	0.039299	0.980415	772	3	0.58685	0.00859005
FFAR1	4	0.33022	0.48409	1	9308	2	0.11718	0.012518	0.039395	0.980415	773	2	0.11718	0.00859005
UBFD1	4	0.76084	0.78024	1	14884	1	0.81387	0.012532	0.039425	0.980415	774	3	0.81387	0.00859005
DMRT3	4	0.44383	0.59309	1	11382	1	0.55803	0.012569	0.039507	0.980415	775	3	0.55803	0.00859005
RAD21L1	4	0.95783	0.95807	1	18413	0	0.56915	0.012615	0.039601	0.980415	776	3	0.56915	0.00859005
GABRQ	4	0.83897	0.84043	1	16046	1	0.96583	0.012622	0.039614	0.980415	777	3	0.96583	0.00859005
RBFOX2	4	0.97061	0.97083	1	18674	0	0.64651	0.012682	0.039726	0.980415	778	3	0.64651	0.00859005
SZT2	4	0.35452	0.50722	1	9761	1	0.62475	0.012716	0.039798	0.980415	779	2	0.62475	0.00859005
GNG5	4	0.39091	0.54192	1	10415	1	0.18893	0.012723	0.039813	0.980415	780	2	0.18893	0.00859005
ST14	4	0.95818	0.95841	1	18423	0	0.64569	0.012762	0.0399	0.980415	781	3	0.64569	0.00859005
SNRNP70	4	0.30008	0.45532	1	8767	1	-0.10482	0.012774	0.039932	0.980415	782	1	-0.10482	0
LRRC6	4	0.14543	0.29395	0.986466	5742	1	0.68491	0.012793	0.039966	0.980415	783	3	0.68491	0.00859005
SLC16A2	4	0.050934	0.12733	0.959404	2570	1	0.85967	0.012818	0.040023	0.980415	784	3	0.85967	0.00859005
LZTFL1	4	0.020781	0.065999	0.927324	1373	1	0.26771	0.012825	0.04004	0.980415	785	2	0.26771	0.00859005
GMPS	4	0.045762	0.11754	0.956034	2379	3	-0.75661	0.012876	0.040155	0.980415	786	1	-0.75661	0.0195267
PIK3C2G	4	0.73016	0.76085	1	14508	1	0.6277	0.012883	0.040173	0.980415	787	3	0.6277	0.00859005
AGA	4	0.87041	0.87069	1	16621	0	0.67297	0.012914	0.040244	0.980415	788	3	0.67297	0.00859005
GPR26	4	0.22635	0.38514	0.998604	7466	1	0.72736	0.012992	0.040414	0.980415	789	3	0.72736	0.00859005
MS4A15	4	0.91147	0.9118	1	17448	0	0.73554	0.013005	0.040447	0.980415	790	3	0.73554	0.00859005
PGR	4	0.93443	0.93472	1	17932	0	-0.0005605	0.01303	0.040496	0.980415	791	1	-0.0005605	0
THBS2	4	0.53467	0.66471	1	12713	1	0.67562	0.013059	0.040564	0.980415	792	3	0.67562	0.00859005
MROH7	4	0.92237	0.92266	1	17693	0	0.081917	0.013081	0.040613	0.980415	793	1	0.081917	0.00859005
HADHB	4	0.79688	0.80591	1	15393	1	0.17588	0.013132	0.040721	0.980415	794	1	0.17588	0.00859005
ANKUB1	4	0.91616	0.91648	1	17547	0	0.54374	0.013133	0.040724	0.980415	795	2	0.54374	0.00859005
RRP15	4	0.92395	0.92426	1	17731	0	0.70809	0.013164	0.040794	0.980415	796	3	0.70809	0.00859005
VN1R1	4	0.93771	0.93795	1	17999	0	0.15028	0.013183	0.040837	0.980415	797	2	0.15028	0.00859005
PDZD11	4	0.23467	0.39306	1	7608	1	0.15265	0.013234	0.040958	0.980415	798	2	0.15265	0.00859005
SURF6	4	0.50625	0.65355	1	12515	1	0.79326	0.013237	0.040963	0.980415	799	3	0.79326	0.00859005
SKA1	4	0.97256	0.97278	1	18716	0	0.78515	0.013275	0.041054	0.980415	800	3	0.78515	0.00859005
CCRN4L	4	0.90168	0.90194	1	17268	0	0.07809	0.013285	0.04107	0.980415	801	1	0.07809	0.00859005
EFCAB7	4	0.4097	0.56022	1	10752	2	0.26017	0.013297	0.041095	0.980415	802	2	0.26017	0.00859005
NR4A3	4	0.94679	0.94701	1	18188	0	0.6599	0.013322	0.041155	0.980415	803	3	0.6599	0.00859005
C19orf66	4	0.053167	0.13157	0.964726	2633	2	-0.13965	0.013337	0.04119	0.980415	804	2	-0.13965	0.015596
C11orf96	4	0.019299	0.061663	0.926582	1286	2	-0.25496	0.013344	0.04121	0.980415	805	2	-0.25496	0.0331161
EFCAB1	4	0.65858	0.72093	1	13766	1	0.59168	0.013354	0.041234	0.980415	806	3	0.59168	0.00859005
MBD4	4	0.92734	0.92761	1	17798	0	0.90306	0.013421	0.041377	0.980415	807	3	0.90306	0.00859005
VGF	4	0.043312	0.11271	0.955991	2277	2	-1.1546	0.013439	0.041416	0.980415	808	1	-1.1546	0.0195462
FBLIM1	4	0.97859	0.97882	1	18840	0	0.61845	0.01344	0.041418	0.980415	809	2	0.61845	0.00859005
PGM3	4	0.14209	0.28844	0.986466	5631	2	0.099617	0.013461	0.041455	0.980415	810	2	0.099617	0.00859005
LOC100129697	4	0.97149	0.9717	1	18696	0	0.60367	0.013475	0.041495	0.980415	811	3	0.60367	0.00859005
PHOSPHO1	4	0.015891	0.051615	0.920133	1079	1	0.65303	0.013496	0.041541	0.980415	812	3	0.65303	0.00859005
RBM23	4	0.97983	0.98004	1	18873	0	0.78474	0.013529	0.041613	0.980415	813	3	0.78474	0.00859005
DIO1	4	0.73632	0.76463	1	14588	1	0.033249	0.013541	0.041648	0.980415	814	2	0.033249	0.00859005
PRPF18	4	0.46148	0.61028	1	11681	1	0.86634	0.013555	0.041673	0.980415	815	3	0.86634	0.00859005
DLEU7	4	0.25544	0.41267	1	7956	1	0.48323	0.013578	0.041735	0.980415	816	2	0.48323	0.00859005
NIP7	4	0.49452	0.64231	1	12311	1	0.78827	0.013598	0.041782	0.980415	817	3	0.78827	0.00859005
WDFY3	4	0.7404	0.76718	1	14635	1	0.74676	0.013609	0.041802	0.980415	818	3	0.74676	0.00859005
EDEM2	4	0.15234	0.30511	0.986466	5969	2	-0.3924	0.013643	0.041874	0.980415	819	1	-0.3924	0.00591788
TMEM170B	4	0.87918	0.87949	1	16793	0	0.46138	0.01366	0.041918	0.980415	820	2	0.46138	0.00859005
TSPY4	4	0.97149	0.97169	1	18695	0	0.64119	0.013671	0.041943	0.980415	821	3	0.64119	0.00859005
LENG8	4	0.95412	0.95436	1	18339	0	0.49098	0.013694	0.042002	0.980415	822	2	0.49098	0.00859005
DYNC1LI2	4	0.97683	0.97702	1	18810	0	0.65672	0.013706	0.042029	0.980415	823	3	0.65672	0.00859005
DMPK	4	0.30828	0.46305	1	8920	2	0.16284	0.013709	0.042035	0.980415	824	2	0.16284	0.00859005
WDR83	4	0.96319	0.96339	1	18523	0	0.62296	0.013716	0.042048	0.980415	825	3	0.62296	0.00859005
SPINT3	4	0.39021	0.54125	1	10400	2	0.56301	0.013737	0.042084	0.980415	826	2	0.56301	0.00859005
SRA1	4	0.51348	0.65637	1	12561	1	-0.080565	0.013746	0.0421	0.980415	827	1	-0.080565	0
C6orf89	4	0.020832	0.066151	0.927324	1375	2	0.24903	0.013757	0.04213	0.980415	828	2	0.24903	0.00859005
AGBL5	4	0.027044	0.080552	0.937554	1651	2	-2.0541	0.013771	0.042156	0.980415	829	2	-2.0541	0.0280037
ERCC6	4	0.55959	0.67502	1	12905	1	0.39002	0.013797	0.042213	0.980415	830	2	0.39002	0.00859005
DCAF12L1	4	0.19398	0.35423	0.991925	6903	1	0.305	0.013848	0.042327	0.980415	831	2	0.305	0.00859005
SSX7	4	0.81811	0.8226	1	15707	1	0.94317	0.013871	0.042378	0.980415	832	3	0.94317	0.00859005
MRPL39	4	0.76367	0.78211	1	14923	1	0.52428	0.013878	0.04239	0.980415	833	3	0.52428	0.00859005
LSM11	4	0.96001	0.96024	1	18465	0	0.64376	0.013892	0.042424	0.980415	834	3	0.64376	0.00859005
FAM199X	4	0.39683	0.54763	1	10518	1	0.64554	0.013927	0.042517	0.980415	835	3	0.64554	0.00859005
ACER3	4	0.12772	0.26445	0.986466	5179	3	-0.48888	0.01395	0.04257	0.980415	836	1	-0.48888	0.00591788
OR9K2	4	0.10862	0.23195	0.981986	4571	1	0.52231	0.013952	0.042576	0.980415	837	2	0.52231	0.00859005
PCDHGC5	4	0.61968	0.70195	1	13406	1	0.35554	0.013973	0.042627	0.980415	838	2	0.35554	0.00859005
ACOT7	4	0.87038	0.87066	1	16620	0	0.66797	0.013989	0.042666	0.980415	839	3	0.66797	0.00859005
PPEF2	4	0.52797	0.66208	1	12670	1	0.47366	0.014001	0.042695	0.980415	840	2	0.47366	0.00859005
NUP88	4	0.97017	0.97038	1	18667	0	0.84745	0.014015	0.042721	0.980415	841	3	0.84745	0.00859005
PAGE3	4	0.2406	0.39866	1	7705	2	0.20942	0.014022	0.042734	0.980415	842	2	0.20942	0.00859005
PPP6R1	4	0.86168	0.86202	1	16443	0	0.071065	0.014052	0.042803	0.980415	843	1	0.071065	0.00859005
MAML2	4	0.94522	0.94549	1	18156	0	0.7118	0.014057	0.042813	0.980415	844	3	0.7118	0.00859005
STOML3	4	0.54345	0.66827	1	12783	1	0.62877	0.014057	0.042813	0.980415	845	3	0.62877	0.00859005
HEY1	4	0.95091	0.95116	1	18285	0	0.73969	0.014066	0.042834	0.980415	846	3	0.73969	0.00859005
ATPIF1	4	0.070675	0.16433	0.964726	3266	2	-0.24523	0.014103	0.04293	0.980653	847	2	-0.24523	0.015596
MED16	4	0.85125	0.85186	1	16263	1	0.44984	0.014127	0.042989	0.980653	848	2	0.44984	0.00848464
ALDH1A3	4	0.1964	0.35656	0.991925	6947	2	-0.20487	0.014154	0.043056	0.980653	849	1	-0.20487	0.00352116
UBQLN4	4	0.40946	0.55998	1	10745	1	0.42452	0.014169	0.04309	0.980653	850	2	0.42452	0.00848464
CCDC137	4	0.73891	0.76625	1	14623	1	-0.22641	0.014206	0.043175	0.980653	851	1	-0.22641	0
BOC	4	0.988	0.98801	1	19044	0	0.64543	0.014218	0.043203	0.980653	852	3	0.64543	0.00848464
PRDM16	4	0.95605	0.95626	1	18375	0	0.65767	0.014222	0.043213	0.980653	853	3	0.65767	0.00848464
H2AFB1	4	0.45414	0.60314	1	11565	2	0.15326	0.014275	0.043328	0.980653	854	2	0.15326	0.00848464
CNOT1	4	0.74875	0.77242	1	14734	1	0.32822	0.014289	0.043359	0.980653	855	2	0.32822	0.00848464
ZNF570	4	0.26314	0.42004	1	8091	2	-0.45203	0.014308	0.043395	0.980653	856	1	-0.45203	0
OSER1	4	0.7013	0.7439	1	14181	1	0.69412	0.014331	0.043447	0.980653	857	3	0.69412	0.00848464
ADD3	4	0.98946	0.98947	1	19082	0	0.69216	0.014351	0.043485	0.980653	858	3	0.69216	0.00848464
KIF13B	4	0.03489	0.096234	0.939418	1977	2	-0.22402	0.014359	0.043502	0.980653	859	1	-0.22402	0.0271411
AIFM1	4	0.43701	0.58647	1	11249	2	0.021908	0.01441	0.043625	0.981339	860	2	0.021908	0.00818094
OTUD6A	4	0.14846	0.29893	0.986466	5846	2	0.097089	0.014512	0.043876	0.981339	861	2	0.097089	0.00818094
WDR46	4	0.90054	0.90079	1	17240	0	0.55027	0.014588	0.044039	0.981339	862	3	0.55027	0.00818094
HSPA14	4	0.66119	0.72224	1	13795	1	0.58481	0.014602	0.044058	0.981339	863	3	0.58481	0.00818094
TTC33	4	0.98918	0.98917	1	19074	0	0.61254	0.014605	0.044066	0.981339	864	3	0.61254	0.00818094
ATM	4	0.40329	0.55399	1	10636	2	-0.35038	0.014614	0.044088	0.981339	865	1	-0.35038	0
PLA2G2D	4	0.48538	0.63352	1	12139	2	0.30383	0.014615	0.044089	0.981339	866	2	0.30383	0.00818094
SRD5A3	4	0.98008	0.98029	1	18879	0	0.68851	0.014619	0.044099	0.981339	867	3	0.68851	0.00818094
IFRD2	4	0.60083	0.69314	1	13248	1	0.090298	0.014665	0.044207	0.981339	868	2	0.090298	0.00818094
HIST2H2AC	4	0.96198	0.96218	1	18508	0	0.96419	0.014716	0.044328	0.981339	869	3	0.96419	0.00818094
ATG4B	4	0.31158	0.46626	1	8968	2	-0.35301	0.014716	0.044329	0.981339	870	1	-0.35301	0
TEX15	4	0.039581	0.10541	0.947217	2155	2	-0.24993	0.014736	0.044368	0.981339	871	2	-0.24993	0.0235505
RNF151	4	0.8939	0.89404	1	17116	0	0.68573	0.014757	0.044405	0.981339	872	3	0.68573	0.00818094
EIF4A3	4	0.48306	0.63126	1	12095	2	-1.5947	0.014768	0.044426	0.981339	873	1	-1.5947	0
INTS10	4	0.57954	0.6837	1	13056	1	0.24431	0.014772	0.044437	0.981339	874	2	0.24431	0.00818094
COL17A1	4	0.33041	0.48429	1	9312	1	0.753	0.014794	0.044482	0.981339	875	3	0.753	0.00818094
FAM166B	4	0.98332	0.98346	1	18939	0	0.79518	0.014808	0.044511	0.981339	876	3	0.79518	0.00818094
LOC400863	4	0.15457	0.30873	0.986466	6041	1	0.72006	0.014815	0.044532	0.981339	877	3	0.72006	0.00818094
ASXL3	4	0.97943	0.97963	1	18860	0	0.69458	0.014819	0.044538	0.981339	878	3	0.69458	0.00818094
RHD	4	0.55667	0.67378	1	12889	1	0.53602	0.014865	0.044641	0.981339	879	3	0.53602	0.00818094
CORT	4	0.46941	0.61795	1	11825	2	0.25542	0.014865	0.044642	0.981339	880	2	0.25542	0.00818094
HOXD13	4	0.034209	0.094951	0.939418	1944	2	-0.73705	0.01487	0.044648	0.981339	881	1	-0.73705	0.0271411
DNAJC1	4	0.34414	0.49731	1	9556	1	0.028916	0.014921	0.044759	0.982662	882	1	0.028916	0.00759584
CCDC171	4	0.78146	0.79452	1	15167	1	0.57908	0.015043	0.045028	0.98642	883	3	0.57908	0.00593813
COX8A	4	0.11106	0.23609	0.982397	4648	2	0.089713	0.015046	0.045032	0.98642	884	2	0.089713	0.00593813
FAM98C	4	0.07676	0.17546	0.964726	3497	3	-0.78439	0.015074	0.045099	0.986771	885	1	-0.78439	0.015596
CADM2	4	0.96618	0.96641	1	18587	0	0.76753	0.015118	0.04519	0.987646	886	3	0.76753	0.00539869
DBI	4	0.40997	0.56049	1	10756	2	0.2384	0.01514	0.045242	0.987682	887	2	0.2384	0.00538286
CASZ1	4	0.97434	0.97452	1	18749	0	0.55412	0.015252	0.045479	0.991721	888	3	0.55412	0.00361049
CT47A1	4	0.89169	0.89186	1	17069	0	0.65528	0.015278	0.045534	0.991809	889	3	0.65528	0.00357196
LGALS1	4	0.96955	0.96974	1	18651	0	0.70203	0.015325	0.045636	0.992908	890	3	0.70203	0.00309099
HIST1H2BB	4	0.02071	0.065793	0.927324	1369	3	-1.2392	0.01538	0.045754	0.993383	891	1	-1.2392	0.0327685
CSNK1E	4	0.47645	0.62488	1	11966	1	0.64755	0.015405	0.045812	0.993383	892	3	0.64755	0.00288328
CXCR3	4	0.83327	0.83539	1	15938	1	0.5639	0.015415	0.04583	0.993383	893	3	0.5639	0.00288328
DUOX1	4	0.2462	0.40395	1	7797	2	0.22123	0.015431	0.045863	0.993383	894	2	0.22123	0.00288328
SPRY3	4	0.96666	0.96688	1	18595	0	0.28905	0.015482	0.045985	0.993704	895	3	0.28905	0.00274296
CEACAM6	4	0.87761	0.87788	1	16753	0	0.70399	0.01554	0.046123	0.993704	896	3	0.70399	0.00274296
DOK2	4	0.20726	0.36695	0.994325	7145	2	0.025647	0.015548	0.046138	0.993704	897	2	0.025647	0.00274296
SLC10A7	4	0.88176	0.88205	1	16851	0	0.3938	0.015585	0.046215	0.993704	898	3	0.3938	0.00274296
JKAMP	4	0.65258	0.7179	1	13709	1	0.44399	0.015614	0.04628	0.993704	899	2	0.44399	0.00274296
AIMP1	4	0.45528	0.60427	1	11581	1	0.19726	0.015636	0.046326	0.993704	900	2	0.19726	0.00274296
FRYL	4	0.98635	0.98641	1	19006	0	0.68534	0.015677	0.046413	0.993704	901	3	0.68534	0.00274296
AKAP8L	4	0.83977	0.84116	1	16058	1	0.64752	0.01568	0.046422	0.993704	902	2	0.64752	0.00274296
DGKG	4	0.15007	0.30156	0.986466	5899	2	-0.029621	0.015687	0.046435	0.993704	903	2	-0.029621	0.00591788
CAAP1	4	0.49028	0.63823	1	12228	1	0.61401	0.015688	0.046437	0.993704	904	2	0.61401	0.00274296
OPHN1	4	0.59397	0.69007	1	13181	1	0.5957	0.015691	0.046442	0.993704	905	3	0.5957	0.00274296
CYP2C8	4	0.946	0.94626	1	18174	0	0.33123	0.015738	0.046551	0.994514	906	2	0.33123	0.0023891
TDRD6	4	0.44658	0.59575	1	11430	1	0.67852	0.015776	0.046634	0.994514	907	3	0.67852	0.0023891
SNRPE	4	0.97667	0.97688	1	18807	0	0.72811	0.015786	0.04666	0.994514	908	3	0.72811	0.0023891
SLC28A2	4	0.87346	0.87378	1	16680	0	0.72447	0.015822	0.046746	0.994514	909	3	0.72447	0.0023891
ENOPH1	4	0.05785	0.14041	0.964726	2800	3	-0.592	0.01584	0.046783	0.994514	910	1	-0.592	0.015596
CDS1	4	0.83073	0.83318	1	15900	1	0.61522	0.015902	0.04692	0.994514	911	2	0.61522	0.0023891
VCX3B	4	0.95689	0.95709	1	18394	0	0.64969	0.015917	0.046955	0.994514	912	3	0.64969	0.0023891
ELANE	4	0.59819	0.69193	1	13216	1	0.338	0.015942	0.047013	0.994514	913	2	0.338	0.0023891
LSM7	4	0.45776	0.60668	1	11624	1	0.96846	0.015946	0.047024	0.994514	914	3	0.96846	0.0023891
AGO3	4	0.9845	0.98464	1	18962	0	0.78257	0.015978	0.047094	0.994514	915	3	0.78257	0.0023891
FMR1NB	4	0.9659	0.96612	1	18579	0	0.12981	0.015993	0.047125	0.994514	916	1	0.12981	0.0023891
MPHOSPH6	4	0.98368	0.9838	1	18946	0	0.77737	0.01601	0.047157	0.994514	917	3	0.77737	0.0023891
ARIH2	4	0.84404	0.84503	1	16132	1	0.18259	0.016044	0.047246	0.994514	918	2	0.18259	0.0023891
PHGDH	4	0.4847	0.63287	1	12125	1	0.54768	0.016132	0.047436	0.994514	919	2	0.54768	0.0023891
FOXA3	4	0.46118	0.61001	1	11676	1	0.65663	0.016177	0.047529	0.994514	920	3	0.65663	0.0023891
CDADC1	4	0.85557	0.85603	1	16333	1	0.75877	0.016181	0.047536	0.994514	921	3	0.75877	0.0023891
PITPNA	4	0.57169	0.68027	1	12996	1	0.35303	0.016185	0.047549	0.994514	922	2	0.35303	0.0023891
RPS6KC1	4	0.34032	0.49367	1	9478	2	-0.10285	0.016197	0.047574	0.994514	923	2	-0.10285	0
NRK	4	0.54104	0.6673	1	12766	1	0.52696	0.016206	0.047596	0.994514	924	3	0.52696	0.0023891
SEC24D	4	0.74311	0.76888	1	14663	1	0.66807	0.016207	0.047601	0.994514	925	3	0.66807	0.0023891
ACYP2	4	0.42397	0.57397	1	11007	2	-0.050658	0.016248	0.047692	0.994514	926	2	-0.050658	0
ATXN2L	4	0.91344	0.91376	1	17486	0	0.88025	0.016253	0.047705	0.994514	927	3	0.88025	0.0023891
PDCD2	4	0.51839	0.65831	1	12597	1	0.69933	0.01626	0.047725	0.994514	928	3	0.69933	0.0023891
RNMT	4	0.78897	0.79997	1	15274	1	0.1091	0.016299	0.047824	0.994514	929	1	0.1091	0.0023891
CORIN	4	0.76571	0.78346	1	14941	1	0.61707	0.016318	0.047871	0.994514	930	3	0.61707	0.0023891
SESN2	4	0.97919	0.9794	1	18856	0	0.71628	0.016332	0.0479	0.994514	931	3	0.71628	0.0023891
STMND1	4	0.5024	0.65	1	12437	1	0.45036	0.016334	0.047903	0.994514	932	2	0.45036	0.0023891
THUMPD2	4	0.29696	0.45234	1	8702	2	-0.34585	0.01635	0.047934	0.994514	933	1	-0.34585	0
MAGEA6	4	0.90867	0.90896	1	17379	0	0.61492	0.016368	0.047969	0.994514	934	3	0.61492	0.0023891
TRPA1	4	0.5999	0.69271	1	13236	1	0.61502	0.016444	0.04814	0.996218	935	3	0.61502	0.00164562
ABCC10	4	0.44073	0.59012	1	11330	2	-0.11076	0.016452	0.048154	0.996218	936	1	-0.11076	0
CLRN1	4	0.93649	0.93672	1	17969	0	0.55856	0.016545	0.048363	0.99877	937	2	0.55856	0.000534511
NR5A2	4	0.84833	0.84907	1	16210	1	0.067133	0.016554	0.048381	0.99877	938	2	0.067133	0.000534511
IPMK	4	0.4925	0.64037	1	12267	2	-0.32717	0.016605	0.048493	0.99936	939	1	-0.32717	0
TMEM167B	4	0.6829	0.73367	1	13988	1	-0.15502	0.016656	0.0486	0.99936	940	1	-0.15502	0
TIMM17B	4	0.58983	0.68819	1	13145	1	0.70998	0.016727	0.048759	0.99936	941	3	0.70998	0.000278037
MUSK	4	0.43802	0.58747	1	11274	1	0.64877	0.016735	0.048774	0.99936	942	3	0.64877	0.000278037
WISP1	4	0.98675	0.98678	1	19015	0	0.54199	0.016739	0.048787	0.99936	943	3	0.54199	0.000278037
ALDH1A1	4	0.18138	0.34225	0.989986	6692	2	0.11248	0.016742	0.048791	0.99936	944	2	0.11248	0.000278037
PTPRT	4	0.31249	0.46713	1	8985	2	0.20946	0.016758	0.048833	0.99936	945	2	0.20946	0.000278037
SH3BP5	4	0.054257	0.13365	0.964726	2673	3	-0.72826	0.016809	0.048948	0.99936	946	1	-0.72826	0.015596
RHBG	4	0.15425	0.30822	0.986466	6034	1	0.75565	0.01681	0.048949	0.99936	947	2	0.75565	0.000278037
SAP30	4	0.46407	0.61277	1	11729	1	0.5662	0.016878	0.049099	0.99936	948	3	0.5662	0.000278037
DRD3	4	0.1451	0.29341	0.986466	5732	3	-0.29874	0.016911	0.049178	0.99936	949	1	-0.29874	0.00591788
TST	4	0.93829	0.93852	1	18007	0	0.56878	0.016937	0.049237	0.99936	950	3	0.56878	0.000278037
DUOX2	4	0.0041515	0.014588	0.897982	310	1	0.75481	0.016996	0.049371	0.99936	951	3	0.75481	0.000278037
ITPR3	4	0.40057	0.55138	1	10577	2	-0.063255	0.017013	0.049412	0.99936	952	2	-0.063255	0
PRR36	4	0.84302	0.8441	1	16118	1	0.42049	0.017024	0.04944	0.99936	953	2	0.42049	0.000278037
ALDH6A1	4	0.011955	0.039566	0.907737	824	2	-0.16395	0.017115	0.049637	0.99936	954	1	-0.16395	0.04204
PAXBP1	4	0.83959	0.841	1	16056	1	0.70017	0.017156	0.049723	0.99936	955	3	0.70017	0.000278037
RPL17	4	0.92646	0.92672	1	17779	0	1.0419	0.017186	0.049787	0.99936	956	3	1.0419	0.000278037
TREX1	4	0.16761	0.32912	0.986512	6457	1	0.58097	0.017215	0.049844	0.99936	957	2	0.58097	0.000278037
PRAC2	4	0.86209	0.86244	1	16455	0	0.51759	0.017223	0.049861	0.99936	958	2	0.51759	0.000278037
ARRDC4	4	0.095293	0.2086	0.971248	4141	2	-0.23983	0.017268	0.049966	0.99936	959	2	-0.23983	0.0126699
BMPR2	4	0.0036365	0.012873	0.897982	268	1	0.44666	0.017285	0.050004	0.99936	960	2	0.44666	0.000278037
MLANA	4	0.53372	0.66435	1	12705	1	-0.11552	0.017319	0.050077	0.99936	961	1	-0.11552	0
THAP7	4	0.98264	0.9828	1	18928	0	0.59796	0.017329	0.050105	0.99936	962	3	0.59796	0.000278037
CEP19	4	0.95734	0.95755	1	18401	0	0.63647	0.017339	0.050126	0.99936	963	3	0.63647	0.000278037
DZIP3	4	0.66078	0.72203	1	13789	1	0.40923	0.01737	0.050205	0.99936	964	2	0.40923	0.000278037
MALL	4	0.034236	0.095002	0.939418	1947	1	0.33998	0.01737	0.050205	0.99936	965	2	0.33998	0.000278037
CBX5	4	0.47889	0.62722	1	12011	2	0.20723	0.017408	0.050291	0.99936	966	2	0.20723	0.000278037
EHBP1	4	0.94935	0.94955	1	18253	0	0.97926	0.017416	0.050304	0.99936	967	3	0.97926	0.000278037
ZNF518A	4	0.77335	0.78872	1	15048	1	0.53894	0.017455	0.050386	0.99936	968	3	0.53894	0.000278037
DCAF15	4	0.86289	0.86322	1	16466	0	0.45775	0.017472	0.050419	0.99936	969	2	0.45775	0.000278037
UNC5A	4	0.57992	0.68385	1	13060	1	0.62824	0.017538	0.050565	0.99936	970	3	0.62824	0.000278037
CCR7	4	0.26771	0.42427	1	8178	2	0.19194	0.017555	0.050601	0.99936	971	2	0.19194	0.000278037
ANP32E	4	0.7327	0.7624	1	14541	1	-0.094429	0.017574	0.050639	0.99936	972	1	-0.094429	0
RPS3A	4	0.9455	0.94577	1	18161	0	0.72849	0.017586	0.050669	0.99936	973	2	0.72849	0.000278037
RHBDL3	4	0.45557	0.60458	1	11586	1	0.42714	0.017617	0.050738	0.99936	974	2	0.42714	0.000278037
ZMYM1	4	0.43366	0.58328	1	11188	1	-0.19903	0.017625	0.050755	0.99936	975	1	-0.19903	0
FUT6	4	0.4089	0.55943	1	10735	1	0.57566	0.017643	0.050796	0.99936	976	3	0.57566	0.000278037
WDR43	4	0.573	0.68085	1	13004	1	0.65555	0.017674	0.050868	0.99936	977	3	0.65555	0.000278037
PBRM1	4	0.98966	0.98967	1	19089	0	0.54001	0.017676	0.050874	0.99936	978	3	0.54001	0.000278037
EIF3G	4	0.68575	0.7352	1	14025	1	0.77149	0.017727	0.050987	0.99936	979	3	0.77149	0.000278037
APOA2	4	0.86378	0.86409	1	16485	0	0.60793	0.017765	0.051063	0.99936	980	3	0.60793	0.000278037
GALNT6	4	0.035242	0.096961	0.939418	1994	1	0.66132	0.017812	0.051182	0.99936	981	3	0.66132	0.000278037
RPS10-NUDT3	4	0.9849	0.98502	1	18974	0	0.71976	0.017829	0.051222	0.99936	982	3	0.71976	0.000278037
OGT	4	0.95735	0.95756	1	18402	0	0.62098	0.017829	0.051224	0.99936	983	3	0.62098	0.000278037
TYW1B	4	0.96568	0.96589	1	18573	0	0.67082	0.017875	0.051314	0.99936	984	3	0.67082	0.000278037
F11R	4	0.019827	0.06321	0.926999	1320	3	-0.85103	0.01788	0.051323	0.99936	985	1	-0.85103	0.0329207
DCST2	4	0.16576	0.32664	0.986466	6404	1	0.77043	0.017917	0.051404	0.99936	986	3	0.77043	0.000278037
CARD16	4	0.91072	0.91104	1	17423	0	0.74527	0.017929	0.051433	0.99936	987	2	0.74527	0.000278037
TBX5	4	0.85748	0.85789	1	16370	1	0.65801	0.017936	0.051448	0.99936	988	3	0.65801	0.000278037
H6PD	4	0.5206	0.65918	1	12613	1	0.85894	0.017978	0.051551	0.99936	989	3	0.85894	0.000278037
RPS15	4	0.98091	0.98111	1	18900	0	0.94163	0.017982	0.051558	0.99936	990	3	0.94163	0.000278037
ACSF2	4	0.88577	0.88597	1	16945	0	0.68565	0.01799	0.051577	0.99936	991	3	0.68565	0.000278037
KAZALD1	4	0.96478	0.96499	1	18559	0	0.6531	0.018021	0.051632	0.99936	992	3	0.6531	0.000278037
GLA	4	0.78398	0.79634	1	15206	1	0.46162	0.018047	0.051692	0.99936	993	2	0.46162	0.000278037
C7orf61	4	0.8899	0.8901	1	17030	0	0.72113	0.018071	0.051744	0.99936	994	3	0.72113	0.000278037
SAPCD1	4	0.96673	0.96695	1	18597	0	0.36051	0.018083	0.051772	0.99936	995	2	0.36051	0.000278037
PLCG1	4	0.87827	0.87857	1	16765	0	0.5399	0.018134	0.051871	0.99936	996	3	0.5399	0.000278037
POLR2F	4	0.7132	0.75068	1	14292	1	0.75857	0.01814	0.051886	0.99936	997	3	0.75857	0.000278037
ERC2	4	0.87335	0.87368	1	16677	0	0.66002	0.018171	0.051948	0.99936	998	3	0.66002	0.000278037
PARP16	4	0.76537	0.78323	1	14937	1	0.094485	0.018185	0.051982	0.99936	999	2	0.094485	0.000278037
CDK18	4	0.24489	0.40266	1	7771	2	0.024338	0.018252	0.052129	0.99936	1000	2	0.024338	0.000278037
ADCYAP1	4	0.494	0.64182	1	12300	1	-0.049122	0.018287	0.052205	0.99936	1001	1	-0.049122	0
CISD3	4	0.86118	0.86153	1	16430	0	0.68281	0.018337	0.052317	0.99936	1002	3	0.68281	0.000278037
SNX10	4	0.82218	0.82596	1	15768	1	-0.11619	0.018338	0.052319	0.99936	1003	1	-0.11619	0
SAMHD1	4	0.22294	0.38192	0.998357	7398	1	0.52557	0.018389	0.052431	0.99936	1004	2	0.52557	0.000278037
CRB3	4	0.17756	0.33857	0.989562	6623	1	0.495	0.018394	0.052443	0.99936	1005	2	0.495	0.000278037
SSBP4	4	0.58193	0.68471	1	13075	1	0.37953	0.01844	0.05255	0.99936	1006	2	0.37953	0.000278037
RPAIN	4	0.6934	0.73944	1	14100	1	0.45977	0.018473	0.052626	0.99936	1007	3	0.45977	0.000278037
TEF	4	0.38258	0.53394	1	10278	2	-0.2515	0.018491	0.052662	0.99936	1008	1	-0.2515	0
TTC29	4	0.89218	0.89236	1	17081	0	0.6162	0.0185	0.052681	0.99936	1009	3	0.6162	0.000278037
MRPL55	4	0.1375	0.28084	0.986466	5492	2	0.1483	0.018521	0.052729	0.99936	1010	2	0.1483	0.000278037
CDK2	4	0.51866	0.65843	1	12601	1	0.73289	0.018531	0.052747	0.99936	1011	3	0.73289	0.000278037
LAMP5	4	0.71629	0.75245	1	14330	1	0.13636	0.018542	0.052771	0.99936	1012	2	0.13636	0.000278037
TMEM155	4	0.25434	0.41166	1	7937	1	0.88586	0.018561	0.052815	0.99936	1013	3	0.88586	0.000278037
DNAJB11	4	0.89433	0.8945	1	17126	0	0.67146	0.018577	0.052848	0.99936	1014	3	0.67146	0.000278037
GFY	4	0.33601	0.48957	1	9403	1	-0.094929	0.018593	0.052883	0.99936	1015	1	-0.094929	0
ADRA2A	4	0.97965	0.97985	1	18866	0	0.57987	0.018641	0.052978	0.99936	1016	3	0.57987	0.000278037
RHOT2	4	0.70209	0.74437	1	14191	1	0.36362	0.018695	0.053092	0.99936	1017	3	0.36362	0.000278037
KLF7	4	0.61726	0.70077	1	13383	1	0.64052	0.018736	0.053184	0.99936	1018	3	0.64052	0.000278037
USP49	4	0.45852	0.60738	1	11633	1	0.43095	0.018744	0.053202	0.99936	1019	2	0.43095	0.000278037
CCL1	4	0.89136	0.89155	1	17060	0	0.51396	0.018768	0.053255	0.99936	1020	2	0.51396	0.000278037
ANTXR2	4	0.87462	0.87492	1	16704	0	0.64126	0.018776	0.05327	0.99936	1021	3	0.64126	0.000278037
CGB1	4	0.6611	0.72219	1	13793	1	0.2743	0.018797	0.053313	0.99936	1022	3	0.2743	0.000278037
HDHD2	4	0.90361	0.90385	1	17305	0	0.55729	0.018814	0.053352	0.99936	1023	3	0.55729	0.000278037
PTX3	4	0.80864	0.81499	1	15569	1	0.99949	0.018816	0.053359	0.99936	1024	3	0.99949	0.000278037
LIF	4	0.94055	0.9408	1	18059	0	0.81997	0.018825	0.053379	0.99936	1025	3	0.81997	0.000278037
BEX1	4	0.88891	0.8891	1	17004	0	0.74005	0.01884	0.053418	0.99936	1026	3	0.74005	0.000278037
HS3ST5	4	0.81243	0.81798	1	15631	1	0.7112	0.018845	0.053426	0.99936	1027	3	0.7112	0.000278037
AMIGO2	4	0.78792	0.79918	1	15260	1	0.82627	0.018888	0.053513	0.99936	1028	3	0.82627	0.000278037
TAOK3	4	0.74417	0.76954	1	14677	1	0.64997	0.018936	0.053628	0.99936	1029	3	0.64997	0.000278037
RPS24	4	0.97287	0.97308	1	18720	0	0.93241	0.018968	0.053709	0.99936	1030	3	0.93241	0.000278037
PTGIR	4	0.9647	0.96491	1	18557	0	0.49168	0.018993	0.053774	0.99936	1031	2	0.49168	0.000278037
OR10A4	4	0.86449	0.86478	1	16496	0	0.57384	0.019007	0.053801	0.99936	1032	3	0.57384	0.000278037
TAT	4	0.72145	0.7556	1	14385	1	0.80645	0.019025	0.053837	0.99936	1033	2	0.80645	0.000278037
LETMD1	4	0.97525	0.97544	1	18780	0	0.16671	0.019102	0.054004	0.99936	1034	1	0.16671	0.000278037
NARF	4	0.95851	0.95874	1	18430	0	0.54145	0.01913	0.054066	0.99936	1035	3	0.54145	0.000278037
AMOT	4	0.002709	0.0096722	0.89412	207	1	0.53514	0.019146	0.054099	0.99936	1036	2	0.53514	0.000278037
ACCS	4	0.7079	0.74762	1	14240	1	0.096307	0.019153	0.054118	0.99936	1037	2	0.096307	0.000278037
C3orf22	4	0.04451	0.11504	0.955991	2326	1	0.52139	0.019178	0.054171	0.99936	1038	2	0.52139	0.000278037
TBC1D8B	4	0.98252	0.9827	1	18927	0	0.58609	0.01919	0.054195	0.99936	1039	3	0.58609	0.000278037
TAS2R3	4	0.00028406	0.0010796	0.723267	28	1	0.23602	0.019202	0.054223	0.99936	1040	2	0.23602	0.000278037
UBXN1	4	0.98673	0.98676	1	19014	0	0.63021	0.019214	0.054247	0.99936	1041	3	0.63021	0.000278037
GLRX2	4	0.97349	0.97369	1	18735	0	0.6557	0.01923	0.054286	0.99936	1042	3	0.6557	0.000278037
ALG1L2	4	0.1461	0.29505	0.986466	5759	2	-0.17669	0.019267	0.054362	0.99936	1043	2	-0.17669	0.00591788
CDH6	4	0.44527	0.59447	1	11413	2	-0.25762	0.019306	0.054445	0.99936	1044	1	-0.25762	0
SASS6	4	0.68991	0.73751	1	14063	1	0.70241	0.019316	0.054468	0.99936	1045	3	0.70241	0.000278037
SEPSECS	4	0.04496	0.11593	0.955991	2345	1	0.4514	0.01934	0.05453	0.99936	1046	2	0.4514	0.000278037
AHSP	4	0.75568	0.77689	1	14824	1	0.21242	0.019372	0.054606	0.99936	1047	2	0.21242	0.000278037
DHX38	4	0.89698	0.8972	1	17172	0	0.76327	0.019386	0.054633	0.99936	1048	3	0.76327	0.000278037
CD27	4	0.93707	0.93731	1	17984	0	0.0082209	0.019408	0.054693	0.99936	1049	1	0.0082209	0.000278037
CLEC1B	4	0.67486	0.7293	1	13915	1	0.61584	0.019423	0.054726	0.99936	1050	3	0.61584	0.000278037
NXF2	4	0.97894	0.97914	1	18848	0	0.63079	0.019427	0.054731	0.99936	1051	3	0.63079	0.000278037
CYP2E1	4	0.89375	0.8939	1	17114	0	0.72944	0.019429	0.054736	0.99936	1052	3	0.72944	0.000278037
TREX2	4	0.48822	0.6362	1	12183	1	0.65038	0.019443	0.054769	0.99936	1053	3	0.65038	0.000278037
PROP1	4	0.98245	0.98264	1	18925	0	0.53343	0.019459	0.054811	0.99936	1054	3	0.53343	0.000278037
RPL28	4	0.9641	0.96434	1	18542	0	0.72277	0.019475	0.054843	0.99936	1055	3	0.72277	0.000278037
RBM34	4	0.20613	0.36585	0.993904	7123	1	0.57877	0.019503	0.054907	0.99936	1056	3	0.57877	0.000278037
TOMM22	4	0.6986	0.7424	1	14147	1	0.24137	0.019509	0.054923	0.99936	1057	2	0.24137	0.000278037
RPS17	4	0.92715	0.92742	1	17793	0	0.79364	0.019515	0.054937	0.99936	1058	3	0.79364	0.000278037
DIP2C	4	0.1848	0.34549	0.990391	6754	1	0.62155	0.019527	0.054967	0.99936	1059	3	0.62155	0.000278037
ZBTB39	4	0.95812	0.95834	1	18422	0	0.98229	0.019535	0.054985	0.99936	1060	3	0.98229	0.000278037
OR10H2	4	0.13471	0.27623	0.986466	5403	2	-0.14749	0.01956	0.055042	0.99936	1061	2	-0.14749	0.00591788
IL13RA1	4	0.93526	0.93554	1	17951	0	0.4637	0.019584	0.055089	0.99936	1062	2	0.4637	0.000278037
SLC22A31	4	0.025932	0.078261	0.937554	1608	1	0.37933	0.0196	0.055122	0.99936	1063	2	0.37933	0.000278037
BID	4	0.084065	0.18856	0.964726	3776	2	-0.486	0.019611	0.055141	0.99936	1064	1	-0.486	0.015596
PADI3	4	0.18445	0.34517	0.990391	6748	1	0.5963	0.019661	0.05524	0.99936	1065	3	0.5963	0.000278037
RBM22	4	0.4562	0.60517	1	11601	2	-0.43139	0.019662	0.05524	0.99936	1066	1	-0.43139	0
RPS19BP1	4	0.98894	0.98893	1	19065	0	0.6327	0.019705	0.055336	0.99936	1067	3	0.6327	0.000278037
C6orf120	4	0.092233	0.2031	0.971248	4045	2	-0.044431	0.019713	0.055351	0.99936	1068	2	-0.044431	0.0126699
ANKRD22	4	0.96769	0.96789	1	18614	0	0.52337	0.019714	0.055353	0.99936	1069	2	0.52337	0.000278037
CCDC170	4	0.017829	0.057368	0.920133	1199	1	0.53044	0.019717	0.055359	0.99936	1070	3	0.53044	0.000278037
ALDH4A1	4	0.41711	0.56734	1	10883	1	0.018264	0.019764	0.055453	0.99936	1071	1	0.018264	0.000278037
UGT2B7	4	0.044477	0.11498	0.955991	2324	3	-0.5977	0.019815	0.055569	0.99936	1072	1	-0.5977	0.0195462
TUBG2	4	0.74708	0.77137	1	14716	1	0.45277	0.019821	0.055584	0.99936	1073	2	0.45277	0.000278037
CTSG	4	0.9593	0.95957	1	18451	0	0.63302	0.019856	0.055666	0.99936	1074	3	0.63302	0.000278037
PTPRD	4	0.96077	0.96101	1	18484	0	0.61161	0.019864	0.055677	0.99936	1075	3	0.61161	0.000278037
UBXN11	4	0.93119	0.93145	1	17872	0	0.413	0.019866	0.055682	0.99936	1076	2	0.413	0.000278037
SUMF1	4	0.93622	0.93647	1	17966	0	0.46922	0.019917	0.055796	0.99936	1077	3	0.46922	0.000278037
TTR	4	0.29787	0.45323	1	8719	1	0.67514	0.019928	0.055822	0.99936	1078	3	0.67514	0.000278037
ZSCAN26	4	0.068198	0.15977	0.964726	3183	1	0.42978	0.019967	0.05593	0.99936	1079	3	0.42978	0.000278037
ANKRD20A1	4	0.86318	0.8635	1	16471	0	0.64337	0.019977	0.055952	0.99936	1080	2	0.64337	0.000278037
ANKRD40	4	0.26384	0.42071	1	8102	2	-0.10047	0.020069	0.056154	0.99936	1081	2	-0.10047	0
BSG	4	0.6223	0.7032	1	13431	1	0.55463	0.020085	0.056183	0.99936	1082	3	0.55463	0.000278037
CCDC107	4	0.96277	0.96297	1	18516	0	0.64066	0.020105	0.056224	0.99936	1083	3	0.64066	0.000278037
NEIL2	4	0.77115	0.78718	1	15014	1	0.49148	0.020118	0.056252	0.99936	1084	3	0.49148	0.000278037
CSAG1	4	0.28327	0.4392	1	8462	2	-0.081737	0.02012	0.056258	0.99936	1085	2	-0.081737	0
FNDC4	4	0.91624	0.91656	1	17549	0	0.58346	0.020146	0.056325	0.99936	1086	3	0.58346	0.000278037
HIRA	4	0.91747	0.9178	1	17578	0	0.34275	0.02015	0.056333	0.99936	1087	2	0.34275	0.000278037
SLC25A35	4	0.59405	0.6901	1	13182	1	0.37899	0.020167	0.056359	0.99936	1088	2	0.37899	0.000278037
FBP1	4	0.88433	0.88459	1	16908	0	0.58716	0.020216	0.056474	0.99936	1089	2	0.58716	0.000278037
RPS6KB2	4	0.44751	0.59663	1	11442	1	0.5735	0.020216	0.056474	0.99936	1090	3	0.5735	0.000278037
BPIFC	4	0.87946	0.87975	1	16798	0	-0.0047421	0.020222	0.056488	0.99936	1091	2	-0.0047421	0
AMTN	4	0.98585	0.98592	1	18996	0	0.56682	0.020249	0.056553	0.99936	1092	3	0.56682	0.000278037
INHBB	4	0.59938	0.69248	1	13231	1	0.010199	0.020272	0.056605	0.99936	1093	1	0.010199	0.000278037
ZKSCAN8	4	0.66934	0.72642	1	13875	1	-0.071417	0.020323	0.056709	0.99936	1094	1	-0.071417	0
OR8I2	4	0.51351	0.65639	1	12562	1	0.57047	0.02034	0.056753	0.99936	1095	2	0.57047	0.000278037
ARAP2	4	0.18028	0.34119	0.98987	6673	1	0.58864	0.020353	0.05678	0.99936	1096	3	0.58864	0.000278037
IL9	4	0.90611	0.9064	1	17343	0	0.45509	0.020365	0.056813	0.99936	1097	2	0.45509	0.000278037
ZMAT1	4	0.8507	0.85133	1	16251	1	0.67955	0.020373	0.056832	0.99936	1098	3	0.67955	0.000278037
GALNT4	4	0.46959	0.61812	1	11830	2	-0.028049	0.020374	0.056834	0.99936	1099	2	-0.028049	0
DUOXA2	4	0.81772	0.82227	1	15705	1	0.71731	0.020424	0.056929	0.99936	1100	3	0.71731	0.000278037
P4HA3	4	0.63121	0.70742	1	13508	1	0.41278	0.020425	0.056933	0.99936	1101	2	0.41278	0.000278037
SENP8	4	0.67515	0.72946	1	13918	1	0.71201	0.020448	0.056981	0.99936	1102	3	0.71201	0.000278037
GNL2	4	0.82107	0.82504	1	15748	1	0.61373	0.020465	0.05702	0.99936	1103	2	0.61373	0.000278037
IPO13	4	0.079462	0.18031	0.964726	3609	1	0.25707	0.020476	0.057042	0.99936	1104	2	0.25707	0.000278037
MTR	4	0.18281	0.34363	0.990391	6714	2	0.11759	0.020482	0.057052	0.99936	1105	2	0.11759	0.000278037
XPC	4	0.18516	0.34582	0.990416	6759	1	0.62377	0.020498	0.05708	0.99936	1106	3	0.62377	0.000278037
MTUS2	4	0.89135	0.89155	1	17059	0	0.40244	0.020565	0.057226	0.999893	1107	2	0.40244	4.6472e-05
PCDHGC4	4	0.57851	0.68328	1	13047	1	0.38965	0.020578	0.057257	0.999893	1108	2	0.38965	4.6472e-05
SULT1E1	4	0.76376	0.78216	1	14925	1	0.66986	0.020631	0.05737	0.999893	1109	3	0.66986	4.6472e-05
HLA-DOA	4	0.97906	0.97927	1	18852	0	0.57288	0.020639	0.057383	0.999893	1110	3	0.57288	4.6472e-05
NUP210	4	0.93865	0.93887	1	18014	0	0.58048	0.020648	0.057394	0.999893	1111	2	0.58048	4.6472e-05
PICK1	4	0.97856	0.97879	1	18836	0	0.46429	0.020679	0.057469	0.999893	1112	2	0.46429	4.6472e-05
ADGRA1	4	0.83509	0.83696	1	15976	1	0.34351	0.02073	0.057572	0.999893	1113	2	0.34351	4.6472e-05
ABCA5	4	0.92035	0.92063	1	17652	0	0.6835	0.020778	0.057674	0.999893	1114	3	0.6835	4.6472e-05
EPCAM	4	0.76125	0.78051	1	14892	1	0.48731	0.020781	0.057683	0.999893	1115	2	0.48731	4.6472e-05
CCDC50	4	0.97973	0.97993	1	18870	0	0.54771	0.020799	0.057719	0.999893	1116	2	0.54771	4.6472e-05
CSDE1	4	0.3733	0.52502	1	10121	2	-0.090578	0.020832	0.057795	0.999893	1117	2	-0.090578	0
SSRP1	4	0.43226	0.58193	1	11160	1	0.546	0.020849	0.057835	0.999893	1118	3	0.546	4.6472e-05
GPRC5C	4	0.15252	0.3054	0.986466	5975	2	-0.38158	0.020883	0.057912	0.999893	1119	1	-0.38158	0.00591788
GDE1	4	0.69062	0.73791	1	14073	1	0.68571	0.020908	0.057958	0.999893	1120	3	0.68571	4.6472e-05
CUTC	4	0.89326	0.89343	1	17101	0	0.49033	0.020984	0.058123	0.999893	1121	2	0.49033	4.6472e-05
CENPBD1	4	0.21521	0.37448	0.997962	7264	1	0.056141	0.021035	0.058235	0.999893	1122	2	0.056141	4.6472e-05
HES4	4	0.13839	0.28234	0.986466	5523	2	0.085326	0.02106	0.058287	0.999893	1123	2	0.085326	4.6472e-05
PPOX	4	0.10919	0.23289	0.981986	4591	3	-0.62006	0.021137	0.058454	0.999893	1124	1	-0.62006	0.0078947
RPL36A-HNRNPH2	4	0.68019	0.73219	1	13965	1	0.90647	0.021169	0.058534	0.999893	1125	3	0.90647	4.6472e-05
QSOX2	4	0.97486	0.97504	1	18769	0	0.73872	0.021191	0.058582	0.999893	1126	3	0.73872	4.6472e-05
SPATA16	4	0.94316	0.94344	1	18107	0	0.54222	0.021195	0.058594	0.999893	1127	3	0.54222	4.6472e-05
CLEC5A	4	0.88915	0.88933	1	17010	0	0.34038	0.021239	0.058677	0.999893	1128	2	0.34038	4.6472e-05
SMIM22	4	0.73493	0.76377	1	14565	1	0.55418	0.021267	0.058739	0.999893	1129	3	0.55418	4.6472e-05
IL12RB1	4	0.24797	0.40564	1	7828	2	-0.44047	0.021289	0.058785	0.999893	1130	1	-0.44047	0
DNAJB14	4	0.94572	0.94598	1	18166	0	0.74272	0.021293	0.058793	0.999893	1131	3	0.74272	4.6472e-05
GSTA4	4	0.95056	0.9508	1	18280	0	0.79717	0.02131	0.05883	0.999893	1132	3	0.79717	4.6472e-05
ZNF324B	4	0.94206	0.94233	1	18087	0	0.63347	0.021323	0.058853	0.999893	1133	3	0.63347	4.6472e-05
CDC42BPB	4	0.91595	0.91627	1	17542	0	0.0064041	0.02134	0.058894	0.999893	1134	1	0.0064041	4.6472e-05
FAM43B	4	0.20582	0.36556	0.993904	7114	1	0.68534	0.021383	0.058995	0.999893	1135	3	0.68534	4.6472e-05
VBP1	4	0.1056	0.22663	0.97915	4473	2	-0.02009	0.021432	0.059097	0.999893	1136	2	-0.02009	0.00915077
PDCD4	4	0.93396	0.93425	1	17925	0	0.63149	0.021455	0.059156	0.999893	1137	3	0.63149	4.6472e-05
BANF2	4	0.46952	0.61805	1	11828	2	-0.19415	0.021493	0.059237	0.999893	1138	1	-0.19415	0
ZRANB3	4	0.83671	0.83841	1	16003	1	0.57319	0.021528	0.059324	0.999893	1139	3	0.57319	4.6472e-05
CUX1	4	0.31678	0.47122	1	9060	2	-0.0041798	0.021543	0.059358	0.999893	1140	2	-0.0041798	0
NEU3	4	0.17613	0.33722	0.989562	6591	2	-0.3989	0.021594	0.059465	0.999893	1141	1	-0.3989	0.00455699
SIDT2	4	0.92562	0.92589	1	17760	0	0.55834	0.021622	0.059514	0.999893	1142	3	0.55834	4.6472e-05
R3HDML	4	0.070694	0.16437	0.964726	3267	2	-0.22292	0.021645	0.059564	0.999893	1143	1	-0.22292	0.015596
FSCN3	4	0.31608	0.47055	1	9049	2	-0.33462	0.021696	0.059685	0.999893	1144	1	-0.33462	0
GALT	4	0.96822	0.96842	1	18626	0	0.40694	0.021747	0.059794	0.999893	1145	2	0.40694	4.6472e-05
ZBTB12	4	0.55855	0.67459	1	12899	1	0.69673	0.02176	0.059821	0.999893	1146	3	0.69673	4.6472e-05
JCHAIN	4	0.98097	0.98117	1	18901	0	0.68536	0.021798	0.059898	0.999893	1147	3	0.68536	4.6472e-05
CSF2RA	4	0.65552	0.7194	1	13733	1	0.75872	0.021833	0.059975	0.999893	1148	3	0.75872	4.6472e-05
IDO1	4	0.56431	0.67709	1	12932	1	0.57712	0.021848	0.060012	0.999893	1149	3	0.57712	4.6472e-05
FLYWCH2	4	0.19539	0.3556	0.991925	6929	2	-0.39679	0.021899	0.060124	0.999893	1150	1	-0.39679	0.00352116
C1orf109	4	0.57743	0.68278	1	13040	1	0.39029	0.021927	0.060178	0.999893	1151	2	0.39029	4.6472e-05
ARVCF	4	0.31183	0.4665	1	8975	1	0.68458	0.02197	0.060276	0.999893	1152	3	0.68458	4.6472e-05
IFI27L2	4	0.98781	0.98783	1	19038	0	0.62021	0.022033	0.060418	0.999893	1153	3	0.62021	4.6472e-05
EI24	4	0.88781	0.888	1	16982	0	0.52284	0.022042	0.060438	0.999893	1154	3	0.52284	4.6472e-05
ZNF14	4	0.41918	0.56929	1	10919	2	0.23649	0.022052	0.060454	0.999893	1155	2	0.23649	4.6472e-05
CCL23	4	0.32438	0.47849	1	9199	1	0.73838	0.022082	0.060514	0.999893	1156	2	0.73838	4.6472e-05
TCTEX1D1	4	0.058707	0.14198	0.964726	2836	1	0.74438	0.022092	0.060532	0.999893	1157	3	0.74438	4.6472e-05
OR2T11	4	0.95636	0.95658	1	18381	0	0.54952	0.022099	0.060551	0.999893	1158	3	0.54952	4.6472e-05
APCS	4	0.51693	0.65774	1	12588	1	0.36554	0.022099	0.060551	0.999893	1159	2	0.36554	4.6472e-05
MYEOV2	4	0.88376	0.88403	1	16897	0	0.7609	0.022102	0.060557	0.999893	1160	3	0.7609	4.6472e-05
HTR1E	4	0.96685	0.96707	1	18599	0	0.51386	0.022181	0.060726	0.999893	1161	3	0.51386	4.6472e-05
HSD11B2	4	0.31727	0.47168	1	9071	1	-0.063364	0.022204	0.060772	0.999893	1162	1	-0.063364	0
HMOX1	4	0.35962	0.51201	1	9870	1	0.35059	0.022211	0.060785	0.999893	1163	2	0.35059	4.6472e-05
LUC7L	4	0.82573	0.82893	1	15816	1	-0.15391	0.022255	0.060893	0.999893	1164	1	-0.15391	0
RPS15A	4	0.95997	0.96021	1	18464	0	0.756	0.022263	0.060908	0.999893	1165	3	0.756	4.6472e-05
TAF5L	4	0.48753	0.63554	1	12176	2	-0.053269	0.022306	0.060993	0.999893	1166	1	-0.053269	0
CAPN8	4	0.88984	0.89004	1	17027	0	0.54656	0.022313	0.061004	0.999893	1167	3	0.54656	4.6472e-05
C17orf62	4	0.46279	0.61155	1	11708	2	0.33505	0.022315	0.061009	0.999893	1168	2	0.33505	4.6472e-05
AMBP	4	0.8861	0.88632	1	16950	0	0.60163	0.022348	0.061088	0.999893	1169	3	0.60163	4.6472e-05
SFT2D2	4	0.9731	0.9733	1	18726	0	0.19908	0.022356	0.061102	0.999893	1170	1	0.19908	4.6472e-05
DMRTC1	4	0.72801	0.7596	1	14484	1	0.28923	0.022384	0.061153	0.999893	1171	2	0.28923	4.6472e-05
PRPF31	4	0.23196	0.39045	1	7557	1	0.46472	0.022407	0.061199	0.999893	1172	2	0.46472	4.6472e-05
ATP4A	4	0.3191	0.47344	1	9098	1	0.63601	0.022427	0.061244	0.999893	1173	3	0.63601	4.6472e-05
ZNF138	4	0.93599	0.93625	1	17962	0	0.5386	0.022444	0.061279	0.999893	1174	3	0.5386	4.6472e-05
SIK2	4	0.6579	0.72058	1	13759	1	-0.070895	0.022458	0.061303	0.999893	1175	1	-0.070895	0
EXOSC3	4	0.20087	0.36085	0.992741	7032	2	-0.097185	0.022509	0.06142	0.999893	1176	2	-0.097185	0.00316404
METTL7A	4	0.4746	0.62307	1	11927	1	0.49862	0.022559	0.061531	0.999893	1177	3	0.49862	4.6472e-05
RGL3	4	0.64845	0.71586	1	13669	1	0.65377	0.022592	0.061597	0.999893	1178	3	0.65377	4.6472e-05
CCT2	4	0.97959	0.97979	1	18863	0	0.64008	0.022594	0.061598	0.999893	1179	3	0.64008	4.6472e-05
EIF2D	4	0.051678	0.12876	0.961634	2592	2	0.047641	0.022636	0.061682	0.999893	1180	2	0.047641	4.6472e-05
CACNG3	4	0.48961	0.63758	1	12218	1	0.65063	0.022709	0.061829	0.999893	1181	3	0.65063	4.6472e-05
IRF2BP2	4	0.98858	0.98858	1	19057	0	0.34572	0.022712	0.061836	0.999893	1182	2	0.34572	4.6472e-05
NVL	4	0.2383	0.39644	1	7670	1	0.86753	0.022727	0.061874	0.999893	1183	3	0.86753	4.6472e-05
LMOD1	4	0.98794	0.98795	1	19043	0	0.56011	0.022732	0.061882	0.999893	1184	3	0.56011	4.6472e-05
H2BFWT	4	0.12514	0.2601	0.986466	5093	1	0.57106	0.022762	0.061944	0.999893	1185	3	0.57106	4.6472e-05
ORAI2	4	0.93877	0.93899	1	18017	0	0.51492	0.022767	0.061951	0.999893	1186	3	0.51492	4.6472e-05
KCNH6	4	0.1116	0.23705	0.982397	4667	2	0.22384	0.022828	0.062093	0.999893	1187	2	0.22384	4.6472e-05
DBP	4	0.92461	0.92488	1	17746	0	0.34087	0.022864	0.062164	0.999893	1188	2	0.34087	4.6472e-05
CACNA1E	4	0.34756	0.50061	1	9626	1	0.62339	0.022878	0.062194	0.999893	1189	3	0.62339	4.6472e-05
CXorf57	4	0.92291	0.92322	1	17701	0	0.3952	0.022889	0.06222	0.999893	1190	2	0.3952	4.6472e-05
NABP2	4	0.037201	0.10079	0.940315	2075	1	0.69103	0.022892	0.062221	0.999893	1191	3	0.69103	4.6472e-05
IRGM	4	0.64473	0.71399	1	13627	1	0.45412	0.022907	0.062254	0.999893	1192	2	0.45412	4.6472e-05
PES1	4	0.98836	0.98838	1	19049	0	0.68473	0.022915	0.062272	0.999893	1193	3	0.68473	4.6472e-05
ACLY	4	0.79885	0.80744	1	15423	1	0.22947	0.022966	0.062371	0.999893	1194	2	0.22947	4.6472e-05
PPP2R1A	4	0.4032	0.55391	1	10632	2	0.1861	0.023003	0.062453	0.999893	1195	2	0.1861	4.6472e-05
ZNF707	4	0.41742	0.56764	1	10890	1	0.39813	0.023038	0.062531	0.999893	1196	2	0.39813	4.6472e-05
USF2	4	0.72861	0.75995	1	14488	1	0.48934	0.023067	0.062592	0.999893	1197	3	0.48934	4.6472e-05
FOXR2	4	0.94854	0.94877	1	18233	0	0.62622	0.023102	0.062675	0.999893	1198	3	0.62622	4.6472e-05
CCDC172	4	0.89485	0.89503	1	17129	0	0.60497	0.023106	0.062688	0.999893	1199	3	0.60497	4.6472e-05
C11orf65	4	0.02464	0.07562	0.937554	1557	2	-0.60284	0.023118	0.062715	0.999893	1200	1	-0.60284	0.0280037
POLR2L	4	0.53417	0.66452	1	12709	1	0.47844	0.023169	0.062834	0.999893	1201	2	0.47844	4.6472e-05
COL16A1	4	0.72274	0.7564	1	14406	1	0.36733	0.02317	0.062836	0.999893	1202	2	0.36733	4.6472e-05
ARHGEF38	4	0.016044	0.052078	0.920133	1092	1	0.73309	0.023205	0.062914	0.999893	1203	3	0.73309	4.6472e-05
ZNF146	4	0.63505	0.70931	1	13548	1	0.44237	0.023214	0.062938	0.999893	1204	3	0.44237	4.6472e-05
TCEB1	4	0.93836	0.93859	1	18008	0	0.90745	0.023232	0.062981	0.999893	1205	3	0.90745	4.6472e-05
ERMAP	4	0.63161	0.7076	1	13512	1	0.74049	0.02324	0.062997	0.999893	1206	3	0.74049	4.6472e-05
GTSF1L	4	0.85573	0.85618	1	16335	1	0.71801	0.023268	0.063049	0.999893	1207	3	0.71801	4.6472e-05
LYSMD1	4	0.73163	0.76177	1	14527	1	0.65746	0.023304	0.063132	0.999893	1208	3	0.65746	4.6472e-05
TINAG	4	0.9087	0.909	1	17380	0	0.73257	0.02332	0.063167	0.999893	1209	3	0.73257	4.6472e-05
GATM	4	0.79659	0.80567	1	15387	1	0.41274	0.023321	0.063172	0.999893	1210	3	0.41274	4.6472e-05
FAM187B	4	0.93773	0.93798	1	18001	0	0.54282	0.023346	0.063225	0.999893	1211	3	0.54282	4.6472e-05
UXS1	4	0.98736	0.98737	1	19027	0	0.72624	0.023349	0.063234	0.999893	1212	3	0.72624	4.6472e-05
MAB21L3	4	0.142	0.28828	0.986466	5629	2	-0.59584	0.023372	0.063287	0.999893	1213	1	-0.59584	0.00591788
GPR62	4	0.27525	0.43157	1	8313	1	0.55218	0.023385	0.063312	0.999893	1214	3	0.55218	4.6472e-05
GTF2F1	4	0.94753	0.94775	1	18206	0	0.62463	0.023398	0.063344	0.999893	1215	3	0.62463	4.6472e-05
OR2A25	4	0.60694	0.69597	1	13303	1	0.375	0.023422	0.063386	0.999893	1216	2	0.375	4.6472e-05
CCDC173	4	0.92271	0.92302	1	17695	0	0.6496	0.023426	0.063398	0.999893	1217	3	0.6496	4.6472e-05
KIR3DL1	4	0.98534	0.98544	1	18985	0	0.75579	0.023435	0.06342	0.999893	1218	3	0.75579	4.6472e-05
DNAJC11	4	0.97944	0.97964	1	18861	0	0.527	0.023473	0.063506	0.999893	1219	3	0.527	4.6472e-05
CNST	4	0.027678	0.08184	0.937554	1676	1	0.54196	0.02353	0.063624	0.999893	1220	3	0.54196	4.6472e-05
CPNE9	4	0.61304	0.69878	1	13345	1	0.29762	0.023541	0.063656	0.999893	1221	2	0.29762	4.6472e-05
SRPK3	4	0.63399	0.70879	1	13536	1	0.58164	0.02355	0.063673	0.999893	1222	2	0.58164	4.6472e-05
TSPAN16	4	0.047452	0.12076	0.956075	2441	1	0.44939	0.023575	0.063731	0.999893	1223	2	0.44939	4.6472e-05
SYT5	4	0.69079	0.738	1	14078	1	0.76021	0.023603	0.063786	0.999893	1224	3	0.76021	4.6472e-05
DNMT1	4	0.8336	0.83566	1	15947	1	0.43059	0.023656	0.063898	0.999893	1225	2	0.43059	4.6472e-05
SASH3	4	0.5715	0.68018	1	12994	1	0.57212	0.023679	0.06395	0.999893	1226	3	0.57212	4.6472e-05
TCTE3	4	0.28378	0.43967	1	8470	2	-0.10255	0.023727	0.064046	0.999893	1227	2	-0.10255	0
SRI	4	0.60259	0.69395	1	13261	1	0.6914	0.023745	0.064084	0.999893	1228	3	0.6914	4.6472e-05
ATP9B	4	0.73814	0.76577	1	14612	1	0.17729	0.023777	0.064157	0.999893	1229	2	0.17729	4.6472e-05
FOSL1	4	0.96299	0.96319	1	18519	0	0.56849	0.023816	0.064247	0.999893	1230	3	0.56849	4.6472e-05
ARHGAP33	4	0.26594	0.42268	1	8142	2	-0.27304	0.023828	0.064269	0.999893	1231	1	-0.27304	0
TAL1	4	0.74687	0.77123	1	14713	1	0.68037	0.02383	0.064271	0.999893	1232	3	0.68037	4.6472e-05
PARP12	4	0.56539	0.67754	1	12940	1	0.83625	0.02386	0.06433	0.999893	1233	3	0.83625	4.6472e-05
NAA50	4	0.98483	0.98495	1	18972	0	0.68968	0.023879	0.064376	0.999893	1234	3	0.68968	4.6472e-05
BEX4	4	0.87035	0.87063	1	16619	0	0.60564	0.023879	0.064377	0.999893	1235	3	0.60564	4.6472e-05
AP5S1	4	0.064469	0.15275	0.964726	3043	2	-0.27795	0.02393	0.06447	0.999893	1236	1	-0.27795	0.015596
FAM98B	4	0.87765	0.87792	1	16755	0	0.26407	0.02398	0.064579	0.999893	1237	2	0.26407	4.6472e-05
OSGEP	4	0.42017	0.57028	1	10934	1	0.56741	0.023985	0.064585	0.999893	1238	3	0.56741	4.6472e-05
ITPKC	4	0.18565	0.34629	0.990631	6769	2	-0.57967	0.023995	0.064603	0.999893	1239	2	-0.57967	0.00408809
CACNG5	4	0.8934	0.89357	1	17105	0	0.64378	0.023999	0.064615	0.999893	1240	3	0.64378	4.6472e-05
ADGRF2	4	0.77603	0.7906	1	15089	1	0.56585	0.024008	0.064633	0.999893	1241	3	0.56585	4.6472e-05
ABHD8	4	0.96366	0.96387	1	18532	0	0.54807	0.024018	0.064652	0.999893	1242	3	0.54807	4.6472e-05
P2RX4	4	0.7095	0.74855	1	14262	1	0.56592	0.024036	0.064694	0.999893	1243	3	0.56592	4.6472e-05
TBC1D3C	4	0.36728	0.51928	1	10008	1	0.67199	0.024057	0.064727	0.999893	1244	2	0.67199	4.6472e-05
OR8K3	4	0.013183	0.043349	0.907737	919	2	0.32307	0.024066	0.064744	0.999893	1245	2	0.32307	4.6472e-05
WDR75	4	0.92362	0.92392	1	17723	0	0.46171	0.024082	0.064773	0.999893	1246	2	0.46171	4.6472e-05
SNX6	4	0.97495	0.97513	1	18773	0	0.54224	0.024119	0.064858	0.999893	1247	3	0.54224	4.6472e-05
JUND	4	0.28526	0.44111	1	8490	1	0.67083	0.02412	0.06486	0.999893	1248	3	0.67083	4.6472e-05
NICN1	4	0.041111	0.10843	0.951128	2203	1	0.39253	0.024129	0.064879	0.999893	1249	2	0.39253	4.6472e-05
RPP30	4	0.96799	0.9682	1	18620	0	0.89543	0.024133	0.064887	0.999893	1250	3	0.89543	4.6472e-05
HSD3B7	4	0.38015	0.53159	1	10227	2	0.2524	0.024183	0.064974	0.999893	1251	2	0.2524	4.6472e-05
KIF3B	4	0.3924	0.54337	1	10442	2	0.14056	0.024234	0.065085	0.999893	1252	2	0.14056	4.6472e-05
SMC4	4	0.89771	0.89791	1	17187	0	0.74831	0.024255	0.065129	0.999893	1253	3	0.74831	4.6472e-05
PRAF2	4	0.42306	0.57307	1	10987	2	0.27328	0.024282	0.065198	0.999893	1254	2	0.27328	4.6472e-05
IGDCC4	4	0.27265	0.42909	1	8265	2	0.21398	0.024285	0.065204	0.999893	1255	2	0.21398	4.6472e-05
LETM2	4	0.028234	0.082987	0.937554	1701	2	0.28706	0.024299	0.065243	0.999893	1256	2	0.28706	4.6472e-05
STARD4	4	0.14588	0.29472	0.986466	5753	1	0.69763	0.024312	0.065271	0.999893	1257	3	0.69763	4.6472e-05
ZFP36	4	0.087735	0.19514	0.96539	3914	2	0.13475	0.024326	0.065302	0.999893	1258	2	0.13475	4.6472e-05
LMO1	4	0.61918	0.70168	1	13403	1	0.3144	0.024335	0.065322	0.999893	1259	2	0.3144	4.6472e-05
BTBD8	4	0.36431	0.51652	1	9958	2	0.15481	0.024335	0.065323	0.999893	1260	2	0.15481	4.6472e-05
SRP14	4	0.24077	0.39884	1	7707	2	-0.17894	0.024386	0.065429	0.999893	1261	2	-0.17894	0
APOL5	4	0.091321	0.20149	0.970552	4020	2	-0.43204	0.024437	0.065544	0.999893	1262	2	-0.43204	0.0129812
PSMB11	4	0.96169	0.96189	1	18504	0	0.46509	0.024451	0.065579	0.999893	1263	3	0.46509	4.6472e-05
TMEM131	4	0.98875	0.98875	1	19060	0	0.66329	0.024462	0.065601	0.999893	1264	3	0.66329	4.6472e-05
PIM2	4	0.84521	0.8461	1	16158	1	0.69738	0.024475	0.065623	0.999893	1265	3	0.69738	4.6472e-05
Control_84	4	0.62568	0.7048	1	13468	1	0.52098	0.024534	0.065744	0.999893	1266	2	0.52098	4.6472e-05
SERPINB13	4	0.12766	0.26435	0.986466	5176	1	0.19813	0.024538	0.065752	0.999893	1267	2	0.19813	4.6472e-05
OR7C2	4	0.26604	0.42278	1	8146	1	0.52172	0.024549	0.065774	0.999893	1268	3	0.52172	4.6472e-05
PRSS22	4	0.84855	0.84929	1	16212	1	0.57967	0.024572	0.065826	0.999893	1269	3	0.57967	4.6472e-05
ACTC1	4	0.44469	0.59391	1	11402	2	0.12076	0.02464	0.065972	0.999893	1270	2	0.12076	4.6472e-05
WDR81	4	0.98504	0.98516	1	18977	0	0.5313	0.024669	0.066035	0.999893	1271	2	0.5313	4.6472e-05
SNURF	4	0.0098035	0.032917	0.907737	672	2	-1.5099	0.02469	0.066082	0.999893	1272	2	-1.5099	0.04204
DUSP10	4	0.61831	0.70129	1	13393	1	0.38115	0.024778	0.066269	0.999893	1273	2	0.38115	4.6472e-05
CDC42EP3	4	0.39676	0.54757	1	10516	1	0.6806	0.024801	0.066317	0.999893	1274	3	0.6806	4.6472e-05
AHNAK2	4	0.0085211	0.028829	0.907737	595	1	0.57743	0.024851	0.066427	0.999893	1275	3	0.57743	4.6472e-05
PPIAL4C	4	0.74268	0.76859	1	14657	1	0.97623	0.02486	0.066447	0.999893	1276	3	0.97623	4.6472e-05
NT5C2	4	0.94448	0.94476	1	18140	0	0.59752	0.024862	0.066449	0.999893	1277	3	0.59752	4.6472e-05
SUMO2	4	0.97841	0.97863	1	18834	0	0.68011	0.024893	0.066514	0.999893	1278	3	0.68011	4.6472e-05
ZNF653	4	0.62048	0.70233	1	13417	1	0.35726	0.024944	0.06662	0.999893	1279	2	0.35726	4.6472e-05
DHX36	4	0.77972	0.79322	1	15133	1	0.62465	0.024956	0.066643	0.999893	1280	3	0.62465	4.6472e-05
HELQ	4	0.93463	0.93492	1	17936	0	0.52056	0.024984	0.066701	0.999893	1281	3	0.52056	4.6472e-05
HAPLN3	4	0.19627	0.35643	0.991925	6945	2	-0.26454	0.025045	0.066817	0.999893	1282	1	-0.26454	0.00352116
SPATA5	4	0.098822	0.21474	0.971484	4278	1	0.5576	0.025144	0.067043	0.999893	1283	3	0.5576	4.6472e-05
HIAT1	4	0.4841	0.63229	1	12115	1	0.090705	0.025146	0.067047	0.999893	1284	1	0.090705	4.6472e-05
NAP1L5	4	0.93246	0.93273	1	17904	0	0.63422	0.025151	0.067058	0.999893	1285	2	0.63422	4.6472e-05
EXTL1	4	0.97996	0.98016	1	18876	0	0.51557	0.025168	0.067095	0.999893	1286	3	0.51557	4.6472e-05
BFSP2	4	0.77525	0.79004	1	15074	1	-0.042861	0.025197	0.067166	0.999893	1287	1	-0.042861	0
NSMCE4A	4	0.79217	0.80234	1	15322	1	0.46885	0.025215	0.067205	0.999893	1288	2	0.46885	4.6472e-05
NLRP4	4	0.97476	0.97494	1	18763	0	0.65876	0.02522	0.067217	0.999893	1289	3	0.65876	4.6472e-05
EXOC8	4	0.031231	0.089025	0.938549	1833	3	-0.81365	0.025248	0.067272	0.999893	1290	1	-0.81365	0.027543
OR11H1	4	0.94986	0.95007	1	18261	0	0.40078	0.025349	0.067509	0.999893	1291	2	0.40078	4.6472e-05
TMEM70	4	0.96337	0.96357	1	18528	0	0.42383	0.025352	0.067514	0.999893	1292	2	0.42383	4.6472e-05
IL33	4	0.78373	0.79617	1	15203	1	0.67127	0.025353	0.067514	0.999893	1293	3	0.67127	4.6472e-05
ERICH6B	4	0.45304	0.60208	1	11544	2	0.27265	0.02538	0.06757	0.999893	1294	2	0.27265	4.6472e-05
NBPF15	4	0.87804	0.87833	1	16760	0	1.0028	0.025407	0.067638	0.999893	1295	3	1.0028	4.6472e-05
THEGL	4	0.94688	0.94711	1	18190	0	0.28961	0.02545	0.067725	0.999893	1296	2	0.28961	4.6472e-05
IFT88	4	0.94795	0.94819	1	18217	0	0.51848	0.025462	0.067751	0.999893	1297	3	0.51848	4.6472e-05
PIGL	4	0.78461	0.7968	1	15214	1	0.67939	0.025472	0.06777	0.999893	1298	3	0.67939	4.6472e-05
ANKRD26	4	0.42221	0.57222	1	10976	2	0.2137	0.025501	0.06784	0.999893	1299	2	0.2137	4.6472e-05
RBMS1	4	0.79099	0.80147	1	15300	1	0.26142	0.025545	0.067936	0.999893	1300	2	0.26142	4.6472e-05
MAK16	4	0.9216	0.9219	1	17675	0	0.67954	0.025562	0.067967	0.999893	1301	3	0.67954	4.6472e-05
PABPC4L	4	0.80691	0.81365	1	15542	1	0.56497	0.025581	0.068003	0.999893	1302	3	0.56497	4.6472e-05
KANSL2	4	0.87331	0.87363	1	16675	0	0.25941	0.025602	0.068058	0.999893	1303	2	0.25941	4.6472e-05
VOPP1	4	0.82081	0.82481	1	15745	1	0.65878	0.025619	0.068087	0.999893	1304	3	0.65878	4.6472e-05
DOCK1	4	0.22469	0.38356	0.998357	7436	1	0.091771	0.025653	0.068167	0.999893	1305	2	0.091771	4.6472e-05
CDK11A	4	0.13113	0.2702	0.986466	5290	2	-0.51221	0.025704	0.068266	0.999893	1306	1	-0.51221	0.00591788
DHX37	4	0.98175	0.98196	1	18914	0	0.73416	0.025708	0.068273	0.999893	1307	3	0.73416	4.6472e-05
ADAM2	4	0.33129	0.48513	1	9328	1	0.33624	0.02572	0.068296	0.999893	1308	2	0.33624	4.6472e-05
NPHS2	4	0.17026	0.33167	0.988406	6494	2	-0.53676	0.025754	0.068372	0.999893	1309	1	-0.53676	0.00506463
NRIP2	4	0.63266	0.70815	1	13517	1	0.36264	0.025757	0.068378	0.999893	1310	2	0.36264	4.6472e-05
MTMR11	4	0.86932	0.86962	1	16596	0	0.49991	0.025775	0.068408	0.999893	1311	2	0.49991	4.6472e-05
SLITRK4	4	0.099395	0.21576	0.972992	4293	1	0.38706	0.025805	0.068482	0.999893	1312	2	0.38706	4.6472e-05
HAUS3	4	0.16155	0.31999	0.986466	6273	3	-0.55847	0.025856	0.068595	0.999893	1313	1	-0.55847	0.00591788
DYM	4	0.80408	0.81145	1	15499	1	0.489	0.025859	0.068602	0.999893	1314	3	0.489	4.6472e-05
GFRA2	4	0.063634	0.15117	0.964726	3013	1	0.35031	0.025868	0.068615	0.999893	1315	2	0.35031	4.6472e-05
PURA	4	0.38239	0.53377	1	10271	2	-0.10174	0.025906	0.068705	0.999893	1316	2	-0.10174	0
ASGR2	4	0.11776	0.24756	0.984869	4857	3	-0.46189	0.025957	0.068808	0.999893	1317	1	-0.46189	0.00662153
PCSK1N	4	0.064666	0.15314	0.964726	3057	1	0.54417	0.02596	0.068817	0.999893	1318	3	0.54417	4.6472e-05
CA9	4	0.19902	0.35906	0.992252	7005	1	0.32893	0.026008	0.068925	0.999893	1319	2	0.32893	4.6472e-05
MDGA1	4	0.95307	0.95333	1	18318	0	0.55217	0.026008	0.068926	0.999893	1320	3	0.55217	4.6472e-05
BMP2	4	0.11872	0.24924	0.984869	4890	1	0.54913	0.026016	0.068943	0.999893	1321	3	0.54913	4.6472e-05
GRB2	4	0.98964	0.98967	1	19087	0	0.71149	0.02609	0.069109	0.999893	1322	3	0.71149	4.6472e-05
SUN3	4	0.44993	0.59899	1	11493	2	-0.30257	0.026109	0.069155	0.999893	1323	1	-0.30257	0
FAM135B	4	0.51953	0.65876	1	12607	1	0.55066	0.026136	0.069219	0.999893	1324	3	0.55066	4.6472e-05
DDX23	4	0.76047	0.77999	1	14878	1	0.81676	0.026146	0.069235	0.999893	1325	3	0.81676	4.6472e-05
RNPC3	4	0.62419	0.70409	1	13457	1	0.81088	0.026158	0.069262	0.999893	1326	3	0.81088	4.6472e-05
DEFB126	4	0.57493	0.68168	1	13020	1	0.31486	0.02616	0.069266	0.999893	1327	2	0.31486	4.6472e-05
PFKP	4	0.21869	0.3778	0.998357	7322	2	0.13615	0.02621	0.069379	0.999893	1328	2	0.13615	4.6472e-05
MFSD12	4	0.94961	0.94982	1	18257	0	0.59305	0.026235	0.06943	0.999893	1329	3	0.59305	4.6472e-05
GPR148	4	0.23226	0.39073	1	7561	1	0.30005	0.026362	0.069707	0.999893	1330	2	0.30005	4.6472e-05
DEFB104B	4	0.89839	0.89861	1	17203	0	0.29793	0.026413	0.069818	0.999893	1331	2	0.29793	4.6472e-05
CCL17	4	0.04486	0.11575	0.955991	2340	2	-0.099512	0.026453	0.069909	0.999893	1332	2	-0.099512	0.0195462
NSA2	4	0.94625	0.9465	1	18182	0	0.68697	0.026459	0.069924	0.999893	1333	3	0.68697	4.6472e-05
WBSCR27	4	0.75404	0.77582	1	14805	1	0.6943	0.026479	0.069969	0.999893	1334	3	0.6943	4.6472e-05
LIAS	4	0.52543	0.6611	1	12655	1	0.46826	0.026509	0.070026	0.999893	1335	2	0.46826	4.6472e-05
NEURL2	4	0.18703	0.34761	0.991522	6787	2	-0.66409	0.026514	0.070036	0.999893	1336	1	-0.66409	0.00369765
DPH3	4	0.86985	0.87015	1	16610	0	0.60142	0.026537	0.070098	0.999893	1337	2	0.60142	4.6472e-05
ADCK4	4	0.9814	0.98159	1	18906	0	0.55026	0.026542	0.070108	0.999893	1338	3	0.55026	4.6472e-05
SCD5	4	0.48912	0.6371	1	12211	2	-0.27419	0.026615	0.070267	0.999893	1339	1	-0.27419	0
Control_155	4	0.3703	0.52213	1	10073	2	0.16865	0.026668	0.070376	0.999893	1340	2	0.16865	4.6472e-05
AHSG	4	0.14717	0.2968	0.986466	5792	1	0.65851	0.026699	0.070446	0.999893	1341	3	0.65851	4.6472e-05
BCL9L	4	0.10373	0.2233	0.97915	4414	2	-0.64624	0.026716	0.070489	0.999893	1342	1	-0.64624	0.00915077
KATNAL2	4	0.86476	0.86505	1	16501	0	0.6272	0.026743	0.070548	0.999893	1343	2	0.6272	4.6472e-05
PKD2L1	4	0.2755	0.4318	1	8320	1	0.35649	0.026762	0.070584	0.999893	1344	2	0.35649	4.6472e-05
DDIT3	4	0.033415	0.09339	0.939418	1915	3	-0.90497	0.026868	0.070812	0.999893	1345	1	-0.90497	0.0271411
ORM2	4	0.11787	0.24777	0.984869	4862	2	0.10691	0.026884	0.070843	0.999893	1346	2	0.10691	4.6472e-05
SUGP2	4	0.65855	0.72091	1	13765	1	0.6116	0.0269	0.070873	0.999893	1347	3	0.6116	4.6472e-05
EXOSC8	4	0.8521	0.85268	1	16278	1	0.16644	0.026919	0.070907	0.999893	1348	2	0.16644	4.6472e-05
SCIN	4	0.69818	0.74215	1	14142	1	0.60007	0.026949	0.070975	0.999893	1349	3	0.60007	4.6472e-05
LAPTM5	4	0.7341	0.76325	1	14556	1	0.64617	0.026954	0.070985	0.999893	1350	3	0.64617	4.6472e-05
PCDH9	4	0.31125	0.46594	1	8963	2	-0.03202	0.026969	0.071014	0.999893	1351	2	-0.03202	0
MYCBP2	4	0.37236	0.52412	1	10108	2	0.24648	0.026988	0.071055	0.999893	1352	2	0.24648	4.6472e-05
XPNPEP3	4	0.78549	0.79743	1	15225	1	0.70547	0.026999	0.071075	0.999893	1353	3	0.70547	4.6472e-05
ZNF648	4	0.91836	0.91866	1	17596	0	0.47144	0.027004	0.071082	0.999893	1354	3	0.47144	4.6472e-05
SHF	4	0.95275	0.953	1	18315	0	0.26312	0.02702	0.071119	0.999893	1355	2	0.26312	4.6472e-05
C9orf163	4	0.2554	0.41263	1	7954	2	0.084274	0.027063	0.071213	0.999893	1356	2	0.084274	4.6472e-05
RHNO1	4	0.76216	0.78109	1	14903	1	0.043373	0.027071	0.071227	0.999893	1357	2	0.043373	4.6472e-05
HSFX2	4	0.52955	0.66272	1	12678	1	0.5953	0.027073	0.071234	0.999893	1358	3	0.5953	4.6472e-05
CNTN1	4	0.89826	0.89848	1	17201	0	0.34467	0.027082	0.071254	0.999893	1359	2	0.34467	4.6472e-05
QRICH1	4	0.45275	0.60178	1	11541	2	0.38938	0.027092	0.071279	0.999893	1360	2	0.38938	4.6472e-05
TUB	4	0.8457	0.84657	1	16169	1	0.60586	0.02711	0.071307	0.999893	1361	3	0.60586	4.6472e-05
IL10RB	4	0.4495	0.59858	1	11485	2	0.017105	0.027121	0.071339	0.999893	1362	2	0.017105	4.6472e-05
ZNF614	4	0.66929	0.72639	1	13874	1	0.48982	0.027137	0.071376	0.999893	1363	3	0.48982	4.6472e-05
UBAP2	4	0.87473	0.87503	1	16706	0	0.41883	0.027222	0.071567	0.999893	1364	2	0.41883	4.6472e-05
FAM181A	4	0.89603	0.89626	1	17150	0	0.57335	0.027224	0.071571	0.999893	1365	2	0.57335	4.6472e-05
BRF1	4	0.92613	0.92639	1	17771	0	0.39562	0.027252	0.07163	0.999893	1366	2	0.39562	4.6472e-05
CYR61	4	0.72966	0.76057	1	14500	1	0.19111	0.027273	0.071677	0.999893	1367	2	0.19111	4.6472e-05
KRTAP19-1	4	0.62322	0.70364	1	13442	1	0.55924	0.027306	0.07175	0.999893	1368	3	0.55924	4.6472e-05
FAS	4	0.87338	0.8737	1	16678	0	0.46242	0.027316	0.071764	0.999893	1369	3	0.46242	4.6472e-05
ARHGEF7	4	0.25455	0.41185	1	7941	1	0.73214	0.027346	0.071827	0.999893	1370	3	0.73214	4.6472e-05
KANSL3	4	0.96312	0.96331	1	18521	0	0.5341	0.027365	0.071865	0.999893	1371	3	0.5341	4.6472e-05
CHRND	4	0.40328	0.55397	1	10635	1	0.6068	0.027366	0.071865	0.999893	1372	2	0.6068	4.6472e-05
CBWD3	4	0.37136	0.52317	1	10092	1	0.84068	0.027403	0.071939	0.999893	1373	3	0.84068	4.6472e-05
NKX2-1	4	0.3935	0.54442	1	10465	1	0.33329	0.027425	0.071992	0.999893	1374	2	0.33329	4.6472e-05
VILL	4	0.34666	0.49974	1	9603	1	0.38037	0.027442	0.072029	0.999893	1375	2	0.38037	4.6472e-05
TSPO2	4	0.71213	0.75004	1	14284	1	0.63031	0.027451	0.072046	0.999893	1376	3	0.63031	4.6472e-05
DEFB4A	4	0.074598	0.17154	0.964726	3419	1	0.55615	0.027465	0.072079	0.999893	1377	3	0.55615	4.6472e-05
MUM1L1	4	0.80787	0.81441	1	15555	1	0.74558	0.02747	0.07209	0.999893	1378	3	0.74558	4.6472e-05
ATP6V0E2	4	0.83573	0.83753	1	15989	1	0.071197	0.027475	0.072099	0.999893	1379	1	0.071197	4.6472e-05
CELF1	4	0.23246	0.39092	1	7563	2	0.027387	0.027508	0.072171	0.999893	1380	2	0.027387	4.6472e-05
IFNA13	4	0.86412	0.86441	1	16488	0	0.59793	0.027555	0.072276	0.999893	1381	3	0.59793	4.6472e-05
FDX1	4	0.47594	0.62438	1	11952	1	0.35283	0.027577	0.072318	0.999893	1382	3	0.35283	4.6472e-05
PPFIA4	4	0.29314	0.44869	1	8634	1	0.49898	0.027584	0.07234	0.999893	1383	2	0.49898	4.6472e-05
EXOSC10	4	0.27659	0.43282	1	8346	1	0.61527	0.02765	0.072482	0.999893	1384	3	0.61527	4.6472e-05
CLCC1	4	0.27542	0.43172	1	8319	1	0.52912	0.027651	0.072484	0.999893	1385	2	0.52912	4.6472e-05
GRHL1	4	0.79718	0.80615	1	15399	1	-0.021165	0.027678	0.072539	0.999893	1386	1	-0.021165	0
ORMDL3	4	0.65725	0.72027	1	13750	1	-0.0020782	0.027728	0.072654	0.999893	1387	2	-0.0020782	0
SRFBP1	4	0.44579	0.59497	1	11418	2	0.21443	0.027756	0.072714	0.999893	1388	2	0.21443	4.6472e-05
ZNF346	4	0.32415	0.47827	1	9193	1	0.5345	0.027829	0.072881	0.999893	1389	3	0.5345	4.6472e-05
CMC4	4	0.95377	0.954	1	18334	0	0.60702	0.027841	0.072911	0.999893	1390	3	0.60702	4.6472e-05
PTRHD1	4	0.9891	0.9891	1	19069	0	0.59572	0.027842	0.072912	0.999893	1391	3	0.59572	4.6472e-05
KIAA0319L	4	0.64479	0.71402	1	13629	1	0.67263	0.027861	0.072953	0.999893	1392	3	0.67263	4.6472e-05
ANO7	4	0.080869	0.18286	0.964726	3657	1	0.15544	0.02788	0.073	0.999893	1393	1	0.15544	4.6472e-05
CPED1	4	0.30241	0.45754	1	8813	1	0.049067	0.027931	0.073105	0.999893	1394	1	0.049067	4.6472e-05
CENPW	4	0.14313	0.29016	0.986466	5668	1	0.71425	0.027936	0.073114	0.999893	1395	3	0.71425	4.6472e-05
SDF2L1	4	0.07172	0.16625	0.964726	3303	1	0.5881	0.027937	0.073117	0.999893	1396	2	0.5881	4.6472e-05
FAM150B	4	0.84707	0.84789	1	16190	1	0.64036	0.027976	0.073203	0.999893	1397	3	0.64036	4.6472e-05
CYP26A1	4	0.15597	0.31104	0.986466	6083	2	-0.46564	0.027981	0.073218	0.999893	1398	1	-0.46564	0.00591788
MED18	4	0.87836	0.87867	1	16769	0	0.49749	0.028032	0.073334	0.999893	1399	3	0.49749	4.6472e-05
OGG1	4	0.255	0.41227	1	7948	1	0.4598	0.028082	0.07345	0.999893	1400	3	0.4598	4.6472e-05
ASNA1	4	0.93489	0.93516	1	17942	0	0.65893	0.02811	0.073513	0.999893	1401	3	0.65893	4.6472e-05
IL22	4	0.54334	0.66822	1	12782	1	0.053145	0.028183	0.073655	0.999893	1402	1	0.053145	4.6472e-05
SFRP4	4	0.97518	0.97537	1	18779	0	0.59771	0.02821	0.073701	0.999893	1403	3	0.59771	4.6472e-05
GPR108	4	0.13254	0.27255	0.986466	5339	1	0.62125	0.028273	0.073835	0.999893	1404	3	0.62125	4.6472e-05
PARD6A	4	0.81167	0.81742	1	15616	1	0.047882	0.028284	0.07386	0.999893	1405	1	0.047882	4.6472e-05
CFC1	4	0.78952	0.80036	1	15279	1	0.35797	0.028312	0.073904	0.999893	1406	2	0.35797	4.6472e-05
MATN3	4	0.32705	0.48105	1	9252	2	-0.19584	0.028335	0.073961	0.999893	1407	1	-0.19584	0
PPP2CB	4	0.95738	0.95759	1	18404	0	0.58818	0.028408	0.074125	0.999893	1408	3	0.58818	4.6472e-05
ZNF117	4	0.56545	0.67757	1	12942	1	-0.10618	0.028436	0.074188	0.999893	1409	1	-0.10618	0
MYH2	4	0.78823	0.79941	1	15263	1	0.67769	0.028447	0.07421	0.999893	1410	3	0.67769	4.6472e-05
MRPL2	4	0.98923	0.98922	1	19076	0	0.48766	0.028487	0.074287	0.999893	1411	3	0.48766	4.6472e-05
PFDN2	4	0.63484	0.70921	1	13545	1	0.54774	0.028494	0.074303	0.999893	1412	3	0.54774	4.6472e-05
POLR2H	4	0.96987	0.97006	1	18661	0	0.75328	0.028517	0.074359	0.999893	1413	3	0.75328	4.6472e-05
CNTNAP2	4	0.94351	0.9438	1	18114	0	0.63469	0.02854	0.074404	0.999893	1414	3	0.63469	4.6472e-05
MAGED4	4	0.9112	0.91151	1	17436	0	0.47874	0.028591	0.074513	0.999893	1415	2	0.47874	4.6472e-05
HAND2	4	0.36471	0.51689	1	9965	1	0.70623	0.028599	0.074538	0.999893	1416	3	0.70623	4.6472e-05
PBDC1	4	0.71813	0.7536	1	14346	1	0.44673	0.028607	0.074552	0.999893	1417	3	0.44673	4.6472e-05
CBWD1	4	0.80646	0.81328	1	15533	1	0.40154	0.028638	0.074616	0.999893	1418	2	0.40154	4.6472e-05
C12orf57	4	0.49248	0.64035	1	12266	1	0.53578	0.028673	0.074698	0.999893	1419	3	0.53578	4.6472e-05
CALML6	4	0.93496	0.93524	1	17945	0	0.49586	0.028684	0.074722	0.999893	1420	3	0.49586	4.6472e-05
POTEF	4	0.71827	0.75368	1	14348	1	0.26121	0.028689	0.074736	0.999893	1421	2	0.26121	4.6472e-05
KRTAP15-1	4	0.58121	0.68438	1	13069	1	0.44569	0.028707	0.074767	0.999893	1422	2	0.44569	4.6472e-05
NAA11	4	0.94362	0.94391	1	18117	0	0.50092	0.028725	0.074804	0.999893	1423	3	0.50092	4.6472e-05
PGAM1	4	0.89031	0.89052	1	17039	0	0.42239	0.028727	0.074806	0.999893	1424	2	0.42239	4.6472e-05
GIPC3	4	0.14033	0.28553	0.986466	5582	3	-0.61291	0.028739	0.074834	0.999893	1425	1	-0.61291	0.00591788
ANO1	4	0.9499	0.9501	1	18262	0	0.51645	0.02874	0.074836	0.999893	1426	3	0.51645	4.6472e-05
LCNL1	4	0.42377	0.57377	1	11000	1	0.096295	0.02879	0.074952	0.999893	1427	1	0.096295	4.6472e-05
OR4A15	4	0.23149	0.39001	1	7549	2	0.011956	0.02884	0.075067	0.999893	1428	2	0.011956	4.6472e-05
CHFR	4	0.079309	0.18003	0.964726	3604	3	-0.62073	0.028891	0.075175	0.999893	1429	1	-0.62073	0.015596
COG2	4	0.39966	0.55044	1	10565	1	0.47788	0.028935	0.075263	0.999893	1430	3	0.47788	4.6472e-05
Control_139	4	0.069002	0.16123	0.964726	3220	3	-0.75591	0.028941	0.075269	0.999893	1431	1	-0.75591	0.015596
ISX	4	0.22763	0.38634	0.998854	7487	1	0.50349	0.028951	0.07529	0.999893	1432	3	0.50349	4.6472e-05
CHGB	4	0.86266	0.863	1	16462	0	0.394	0.028992	0.075372	0.999893	1433	2	0.394	4.6472e-05
RPP25L	4	0.90366	0.90389	1	17308	0	0.47268	0.029043	0.075472	0.999893	1434	3	0.47268	4.6472e-05
C16orf97	4	0.973	0.9732	1	18723	0	0.57477	0.029085	0.075574	0.999893	1435	3	0.57477	4.6472e-05
PMP22	4	0.97928	0.97949	1	18857	0	0.5867	0.029093	0.075591	0.999893	1436	3	0.5867	4.6472e-05
EEFSEC	4	0.32288	0.47705	1	9172	2	-0.018366	0.029144	0.075698	0.999893	1437	2	-0.018366	0
HNRNPA1	4	0.44682	0.596	1	11435	2	0.15733	0.029174	0.075767	0.999893	1438	2	0.15733	4.6472e-05
PLIN3	4	0.96297	0.96317	1	18518	0	0.77918	0.029183	0.075789	0.999893	1439	3	0.77918	4.6472e-05
RGL4	4	0.93725	0.93749	1	17989	0	0.70958	0.029194	0.075811	0.999893	1440	2	0.70958	4.6472e-05
CECR5	4	0.95453	0.95476	1	18348	0	0.60652	0.029214	0.075846	0.999893	1441	3	0.60652	4.6472e-05
KIF4A	4	0.71961	0.7545	1	14364	1	0.5071	0.029311	0.076048	0.999893	1442	2	0.5071	4.6472e-05
CYP2C18	4	0.04785	0.12152	0.956075	2458	1	0.26483	0.029346	0.076112	0.999893	1443	2	0.26483	4.6472e-05
GPR174	4	0.81567	0.82063	1	15679	1	0.42366	0.029438	0.0763	0.999893	1444	2	0.42366	4.6472e-05
TBXA2R	4	0.44739	0.59653	1	11440	2	0.12338	0.029447	0.076321	0.999893	1445	2	0.12338	4.6472e-05
WFDC11	4	0.66714	0.72531	1	13853	1	0.50312	0.029448	0.076324	0.999893	1446	3	0.50312	4.6472e-05
DCHS1	4	0.98607	0.98614	1	19000	0	0.50533	0.029459	0.076345	0.999893	1447	3	0.50533	4.6472e-05
HMGN2	4	0.15171	0.30414	0.986466	5952	2	-0.58897	0.029497	0.076428	0.999893	1448	1	-0.58897	0.00591788
KANK4	4	0.67498	0.72937	1	13916	1	0.4131	0.029506	0.076439	0.999893	1449	2	0.4131	4.6472e-05
KBTBD12	4	0.96979	0.96997	1	18658	0	0.45596	0.029542	0.076505	0.999893	1450	3	0.45596	4.6472e-05
MTMR10	4	0.71042	0.74908	1	14271	1	0.15206	0.029548	0.07652	0.999893	1451	1	0.15206	4.6472e-05
PDZK1	4	0.9749	0.97508	1	18771	0	0.73677	0.02957	0.076565	0.999893	1452	3	0.73677	4.6472e-05
C6orf136	4	0.82599	0.82914	1	15821	1	0.47198	0.029589	0.076606	0.999893	1453	3	0.47198	4.6472e-05
KAT8	4	0.68369	0.73408	1	13999	1	0.6708	0.029598	0.076619	0.999893	1454	3	0.6708	4.6472e-05
OR56B4	4	0.83377	0.8358	1	15949	1	0.58873	0.029654	0.07674	0.999893	1455	3	0.58873	4.6472e-05
EGLN2	4	0.93866	0.93888	1	18015	0	0.50688	0.029688	0.076817	0.999893	1456	3	0.50688	4.6472e-05
MYH13	4	0.66403	0.72373	1	13824	1	0.71025	0.029693	0.076828	0.999893	1457	3	0.71025	4.6472e-05
FAM53C	4	0.81704	0.82173	1	15695	1	0.6111	0.029699	0.076837	0.999893	1458	3	0.6111	4.6472e-05
MSC	4	0.9211	0.92138	1	17669	0	0.80334	0.029704	0.076848	0.999893	1459	3	0.80334	4.6472e-05
ZDHHC6	4	0.76156	0.78072	1	14896	1	0.45734	0.029742	0.076938	0.999893	1460	2	0.45734	4.6472e-05
MACF1	4	0.39544	0.54632	1	10497	2	0.12725	0.02975	0.07695	0.999893	1461	2	0.12725	4.6472e-05
NAA10	4	0.70747	0.74738	1	14232	1	0.34792	0.029752	0.076958	0.999893	1462	2	0.34792	4.6472e-05
ARSK	4	0.93322	0.93349	1	17915	0	0.51507	0.029762	0.076976	0.999893	1463	2	0.51507	4.6472e-05
PABPC1L2B	4	0.88217	0.88247	1	16862	0	0.76726	0.029783	0.077025	0.999893	1464	3	0.76726	4.6472e-05
OR6C74	4	0.7805	0.7938	1	15145	1	0.10073	0.0298	0.077062	0.999893	1465	1	0.10073	4.6472e-05
TPT1	4	0.786	0.79782	1	15233	1	0.96064	0.029825	0.07711	0.999893	1466	3	0.96064	4.6472e-05
MST1R	4	0.88965	0.88986	1	17022	0	0.51484	0.029867	0.077201	0.999893	1467	3	0.51484	4.6472e-05
FGF23	4	0.033984	0.094518	0.939418	1933	2	-0.37206	0.029901	0.077276	0.999893	1468	1	-0.37206	0.0271411
Control_164	4	0.43986	0.58926	1	11311	1	0.61279	0.029961	0.077409	0.999893	1469	3	0.61279	4.6472e-05
PCDH19	4	0.50288	0.65045	1	12446	1	0.067206	0.030002	0.07749	0.999893	1470	1	0.067206	4.6472e-05
2020-09-11	4	0.92842	0.92868	1	17816	0	0.39638	0.030025	0.077542	0.999893	1471	3	0.39638	4.6472e-05
USP1	4	0.79618	0.80536	1	15379	1	0.60621	0.03004	0.077575	0.999893	1472	3	0.60621	4.6472e-05
NLRP12	4	0.27021	0.42669	1	8216	1	0.3209	0.030053	0.077601	0.999893	1473	2	0.3209	4.6472e-05
OR4K14	4	0.93462	0.93491	1	17935	0	0.20118	0.030103	0.077708	0.999893	1474	2	0.20118	4.6472e-05
JMJD7	4	0.0088734	0.029965	0.907737	618	2	-0.8729	0.030154	0.077824	0.999893	1475	1	-0.8729	0.04204
PTPRU	4	0.44989	0.59895	1	11491	2	0.19266	0.030186	0.077896	0.999893	1476	2	0.19266	4.6472e-05
OR5L1	4	0.10469	0.22499	0.97915	4441	2	-0.13753	0.030204	0.077932	0.999893	1477	2	-0.13753	0.00915077
SLC34A2	4	0.95062	0.95087	1	18282	0	0.49	0.030215	0.077951	0.999893	1478	3	0.49	4.6472e-05
PTK2	4	0.50369	0.65124	1	12465	1	0.65893	0.030216	0.077955	0.999893	1479	3	0.65893	4.6472e-05
AKT3	4	0.23298	0.39143	1	7576	1	0.53851	0.030252	0.078021	0.999893	1480	3	0.53851	4.6472e-05
FGR	4	0.014197	0.046484	0.907737	984	2	-1.3825	0.030255	0.078026	0.999893	1481	1	-1.3825	0.04204
ZNF785	4	0.17103	0.3324	0.988813	6508	1	1.0181	0.030257	0.078029	0.999893	1482	3	1.0181	4.6472e-05
RPS4Y2	4	0.086046	0.1921	0.964726	3850	2	-0.11247	0.030285	0.078092	0.999893	1483	2	-0.11247	0.015596
PFN2	4	0.18869	0.3492	0.991925	6810	2	0.056696	0.030325	0.07818	0.999893	1484	2	0.056696	4.6472e-05
LHX2	4	0.9878	0.98781	1	19037	0	0.51423	0.030355	0.078253	0.999893	1485	3	0.51423	4.6472e-05
FOXN4	4	0.9502	0.95043	1	18271	0	0.51303	0.030363	0.078277	0.999893	1486	3	0.51303	4.6472e-05
CLVS2	4	0.75379	0.77565	1	14803	1	0.52277	0.0304	0.078339	0.999893	1487	3	0.52277	4.6472e-05
PSMA1	4	0.78683	0.79842	1	15245	1	0.59081	0.030405	0.078346	0.999893	1488	2	0.59081	4.6472e-05
SLC25A25	4	0.54953	0.67078	1	12835	1	0.4742	0.030415	0.078365	0.999893	1489	2	0.4742	4.6472e-05
NUDT9	4	0.98729	0.98731	1	19025	0	0.49721	0.030422	0.078383	0.999893	1490	3	0.49721	4.6472e-05
FHL1	4	0.4909	0.63883	1	12241	2	0.5151	0.030454	0.078449	0.999893	1491	2	0.5151	4.6472e-05
TBC1D26	4	0.27526	0.43158	1	8314	2	0.065358	0.030507	0.078565	0.999893	1492	2	0.065358	4.6472e-05
TOPORS	4	0.20082	0.36079	0.992741	7031	1	0.54053	0.030512	0.078579	0.999893	1493	3	0.54053	4.6472e-05
STAT6	4	0.98848	0.98848	1	19051	0	0.66938	0.030544	0.078639	0.999893	1494	3	0.66938	4.6472e-05
PRAMEF14	4	0.46275	0.6115	1	11707	2	0.26308	0.030554	0.078658	0.999893	1495	2	0.26308	4.6472e-05
CD163	4	0.014366	0.046995	0.907737	1001	2	-0.51579	0.030557	0.078663	0.999893	1496	2	-0.51579	0.04204
USP21	4	0.081325	0.18369	0.964726	3673	2	-0.19585	0.030608	0.078772	0.999893	1497	2	-0.19585	0.015596
IGF2BP3	4	0.31245	0.4671	1	8984	1	0.53916	0.030759	0.079103	0.999893	1498	3	0.53916	4.6472e-05
MAPK10	4	0.45073	0.59979	1	11508	2	0.23061	0.030803	0.079206	0.999893	1499	2	0.23061	4.6472e-05
PUS7L	4	0.86025	0.86063	1	16411	1	0.60364	0.030853	0.079326	0.999893	1500	3	0.60364	4.6472e-05
SLC35G5	4	0.2393	0.39743	1	7681	2	-0.30281	0.03086	0.079339	0.999893	1501	1	-0.30281	0
CYP3A7-CYP3A51P	4	0.14217	0.28855	0.986466	5636	2	0.2261	0.030873	0.079368	0.999893	1502	2	0.2261	4.6472e-05
FAM171A2	4	0.67149	0.72757	1	13889	1	0.41147	0.030911	0.079443	0.999893	1503	2	0.41147	4.6472e-05
DTL	4	0.90584	0.90612	1	17339	0	0.89098	0.030913	0.079447	0.999893	1504	3	0.89098	4.6472e-05
BCAS3	4	0.40348	0.55416	1	10639	2	0.22634	0.030933	0.079496	0.999893	1505	2	0.22634	4.6472e-05
AASDH	4	0.27192	0.42836	1	8247	1	0.61522	0.030961	0.079553	0.999893	1506	3	0.61522	4.6472e-05
ANKRD2	4	0.48905	0.63702	1	12208	1	0.5506	0.030973	0.079572	0.999893	1507	2	0.5506	4.6472e-05
EML4	4	0.86731	0.86758	1	16551	0	0.71409	0.030993	0.079607	0.999893	1508	3	0.71409	4.6472e-05
FOXM1	4	0.81004	0.8161	1	15593	1	-0.11887	0.031011	0.079649	0.999893	1509	1	-0.11887	0
CNOT8	4	0.66542	0.72443	1	13836	1	0.46576	0.031031	0.079692	0.999893	1510	3	0.46576	4.6472e-05
OPN5	4	0.53379	0.66438	1	12707	1	0.4358	0.031033	0.079699	0.999893	1511	2	0.4358	4.6472e-05
PIK3R2	4	0.68179	0.73307	1	13976	1	0.31485	0.031062	0.079746	0.999893	1512	2	0.31485	4.6472e-05
RAP1A	4	0.24363	0.40147	1	7753	1	0.19273	0.031073	0.079781	0.999893	1513	2	0.19273	4.6472e-05
CRYGB	4	0.91653	0.91687	1	17559	0	0.3969	0.031074	0.079783	0.999893	1514	3	0.3969	4.6472e-05
ASCC1	4	0.47496	0.6234	1	11934	2	-0.26284	0.031112	0.079868	0.999893	1515	1	-0.26284	0
NAALADL1	4	0.69645	0.74115	1	14124	1	0.20855	0.031254	0.080148	0.999893	1516	2	0.20855	4.6472e-05
CXorf65	4	0.18927	0.34975	0.991925	6820	2	-0.20398	0.031264	0.080165	0.999893	1517	2	-0.20398	0.00352116
OR51Q1	4	0.83657	0.83828	1	16000	1	0.53571	0.031274	0.080189	0.999893	1518	2	0.53571	4.6472e-05
C4orf33	4	0.57603	0.68219	1	13031	1	0.46503	0.031333	0.080311	0.999893	1519	3	0.46503	4.6472e-05
CDC14A	4	0.71534	0.7519	1	14315	1	0.18855	0.031364	0.08038	0.999893	1520	2	0.18855	4.6472e-05
PI3	4	0.97161	0.97181	1	18698	0	0.48062	0.031365	0.08038	0.999893	1521	2	0.48062	4.6472e-05
ASCL3	4	0.54648	0.66954	1	12810	1	0.64654	0.031404	0.080452	0.999893	1522	3	0.64654	4.6472e-05
B4GALNT2	4	0.01453	0.047514	0.911688	1008	2	-2.9293	0.031415	0.080479	0.999893	1523	2	-2.9293	0.0401538
SLC5A11	4	0.98645	0.9865	1	19008	0	0.45376	0.031452	0.080563	0.999893	1524	3	0.45376	4.6472e-05
SERPINE3	4	0.97843	0.97864	1	18835	0	0.48217	0.031458	0.080572	0.999893	1525	3	0.48217	4.6472e-05
SPATA20	4	0.051081	0.12762	0.959777	2572	2	-0.71616	0.031516	0.080704	0.999893	1526	1	-0.71616	0.0178297
SCFD1	4	0.56928	0.67921	1	12979	1	0.75587	0.031516	0.080705	0.999893	1527	3	0.75587	4.6472e-05
ZBTB47	4	0.65139	0.71732	1	13696	1	0.38535	0.031546	0.080772	0.999893	1528	2	0.38535	4.6472e-05
USP26	4	0.76036	0.77993	1	14876	1	0.38752	0.031566	0.080818	0.999893	1529	2	0.38752	4.6472e-05
TNFSF14	4	0.68292	0.73367	1	13989	1	0.3977	0.031577	0.080836	0.999893	1530	2	0.3977	4.6472e-05
TMIGD3	4	0.30407	0.45909	1	8846	1	0.61028	0.031594	0.080869	0.999893	1531	3	0.61028	4.6472e-05
KAT6B	4	0.40323	0.55393	1	10633	2	-0.2002	0.031617	0.080911	0.999893	1532	1	-0.2002	0
C21orf2	4	0.9185	0.91879	1	17601	0	0.79995	0.031658	0.080998	0.999893	1533	3	0.79995	4.6472e-05
MYCL	4	0.51804	0.65818	1	12593	1	0.29469	0.031668	0.081021	0.999893	1534	2	0.29469	4.6472e-05
LCE3A	4	0.78639	0.7981	1	15241	1	0.17889	0.031717	0.081119	0.999893	1535	2	0.17889	4.6472e-05
KHDRBS1	4	0.85716	0.85758	1	16364	1	0.67377	0.031746	0.081171	0.999893	1536	3	0.67377	4.6472e-05
SALL2	4	0.20441	0.36421	0.993726	7096	2	0.15901	0.031759	0.081198	0.999893	1537	2	0.15901	4.6472e-05
RNASE6	4	0.9863	0.98637	1	19004	0	0.43768	0.031763	0.081205	0.999893	1538	3	0.43768	4.6472e-05
Control_41	4	0.84193	0.84312	1	16099	1	-0.26245	0.031768	0.081211	0.999893	1539	1	-0.26245	0
ZNF821	4	0.28819	0.44398	1	8546	2	0.28683	0.031779	0.081233	0.999893	1540	2	0.28683	4.6472e-05
SH3BP5L	4	0.5028	0.65038	1	12444	1	0.6803	0.031818	0.081328	0.999893	1541	3	0.6803	4.6472e-05
RHCG	4	0.85833	0.85871	1	16382	1	0.58389	0.03183	0.081351	0.999893	1542	3	0.58389	4.6472e-05
FOXRED2	4	0.9311	0.93135	1	17870	0	0.49371	0.031869	0.081431	0.999893	1543	2	0.49371	4.6472e-05
SYNPO2L	4	0.77214	0.78784	1	15031	1	0.75385	0.031872	0.081436	0.999893	1544	3	0.75385	4.6472e-05
GABPB2	4	0.49838	0.64612	1	12376	1	0.56353	0.031891	0.08147	0.999893	1545	3	0.56353	4.6472e-05
UVRAG	4	0.89316	0.89333	1	17097	0	0.12043	0.031919	0.081538	0.999893	1546	2	0.12043	4.6472e-05
NHLH1	4	0.83451	0.83644	1	15966	1	0.38611	0.031921	0.081539	0.999893	1547	2	0.38611	4.6472e-05
CPNE8	4	0.65707	0.72018	1	13748	1	0.65947	0.031921	0.08154	0.999893	1548	3	0.65947	4.6472e-05
ZNF177	4	0.034377	0.095269	0.939418	1951	3	-0.65038	0.03202	0.081734	0.999893	1549	1	-0.65038	0.0271411
CTAGE1	4	0.42127	0.57131	1	10954	1	0.48058	0.032043	0.081781	0.999893	1550	2	0.48058	4.6472e-05
CDK19	4	0.33399	0.48773	1	9372	1	-0.071595	0.03207	0.081845	0.999893	1551	1	-0.071595	0
GOLGA1	4	0.016274	0.052769	0.920133	1101	2	-0.51452	0.032073	0.081852	0.999893	1552	2	-0.51452	0.0361494
ATP2A2	4	0.94616	0.94642	1	18177	0	0.6884	0.032108	0.081921	0.999893	1553	3	0.6884	4.6472e-05
DARS2	4	0.33677	0.49032	1	9419	2	-0.086571	0.032121	0.081948	0.999893	1554	1	-0.086571	0
APLN	4	0.61687	0.70059	1	13381	1	0.57447	0.032171	0.082057	0.999893	1555	2	0.57447	4.6472e-05
DNPH1	4	0.94289	0.94319	1	18102	0	0.62635	0.032185	0.082083	0.999893	1556	3	0.62635	4.6472e-05
STAC2	4	0.9239	0.92421	1	17730	0	0.4572	0.032216	0.082143	0.999893	1557	2	0.4572	4.6472e-05
AARS	4	0.085612	0.1913	0.964726	3833	1	0.37416	0.032267	0.082265	0.999893	1558	2	0.37416	4.6472e-05
IGFBPL1	4	0.94163	0.94189	1	18081	0	0.36898	0.032272	0.082282	0.999893	1559	2	0.36898	4.6472e-05
LOC101928841	4	0.49232	0.6402	1	12260	1	0.41184	0.032284	0.082303	0.999893	1560	3	0.41184	4.6472e-05
PRR19	4	0.80024	0.80852	1	15441	1	0.52957	0.032287	0.08231	0.999893	1561	2	0.52957	4.6472e-05
LIMS3	4	0.78892	0.79993	1	15272	1	0.2723	0.032322	0.082386	0.999893	1562	2	0.2723	4.6472e-05
HEPACAM	4	0.74344	0.76909	1	14667	1	0.52947	0.032359	0.08246	0.999893	1563	2	0.52947	4.6472e-05
PGK1	4	0.25571	0.41291	1	7964	1	0.71613	0.032379	0.082504	0.999893	1564	3	0.71613	4.6472e-05
HTR3E	4	0.50959	0.65487	1	12540	1	0.59023	0.032383	0.082509	0.999893	1565	3	0.59023	4.6472e-05
SHROOM3	4	0.54319	0.66815	1	12780	1	0.57099	0.032411	0.082569	0.999893	1566	3	0.57099	4.6472e-05
CYP3A5	4	0.76049	0.78001	1	14879	1	-0.14551	0.032423	0.082593	0.999893	1567	1	-0.14551	0
WDR17	4	0.079753	0.18084	0.964726	3619	1	0.69037	0.032444	0.082644	0.999893	1568	3	0.69037	4.6472e-05
OR9Q1	4	0.87252	0.87282	1	16661	0	0.63037	0.032471	0.082715	0.999893	1569	3	0.63037	4.6472e-05
KHSRP	4	0.75258	0.7749	1	14786	1	0.43923	0.032481	0.082735	0.999893	1570	2	0.43923	4.6472e-05
COG1	4	0.92019	0.92048	1	17647	0	0.65292	0.032482	0.082737	0.999893	1571	3	0.65292	4.6472e-05
SSTR1	4	0.48858	0.63657	1	12194	1	0.53923	0.032502	0.082785	0.999893	1572	3	0.53923	4.6472e-05
CXorf49B	4	0.91548	0.91581	1	17531	0	0.44879	0.032524	0.082819	0.999893	1573	2	0.44879	4.6472e-05
SPDYE5	4	0.84065	0.84197	1	16077	1	0.52768	0.032563	0.082909	0.999893	1574	2	0.52768	4.6472e-05
IZUMO1R	4	0.5968	0.69132	1	13203	1	0.52298	0.032566	0.082912	0.999893	1575	3	0.52298	4.6472e-05
OCA2	4	0.5672	0.67832	1	12961	1	0.21189	0.032625	0.083033	0.999893	1576	2	0.21189	4.6472e-05
TTC31	4	0.54999	0.67096	1	12841	1	0.11722	0.032675	0.083132	0.999893	1577	2	0.11722	4.6472e-05
KDELR2	4	0.65979	0.72154	1	13777	1	0.47995	0.032699	0.083188	0.999893	1578	3	0.47995	4.6472e-05
PAM16	4	0.40215	0.55291	1	10607	1	0.49015	0.032732	0.083261	0.999893	1579	3	0.49015	4.6472e-05
FAM47B	4	0.95543	0.95564	1	18369	0	0.52676	0.032758	0.083312	0.999893	1580	3	0.52676	4.6472e-05
GDF11	4	0.48047	0.62877	1	12041	1	0.57809	0.032771	0.083344	0.999893	1581	3	0.57809	4.6472e-05
SLC16A8	4	0.1961	0.35627	0.991925	6940	2	-0.39238	0.032776	0.083351	0.999893	1582	1	-0.39238	0.00352116
CNDP2	4	0.032138	0.090798	0.939418	1862	3	-1.0706	0.032826	0.083451	0.999893	1583	1	-1.0706	0.0271411
ZRSR2	4	0.95061	0.95086	1	18281	0	0.54119	0.032843	0.083483	0.999893	1584	3	0.54119	4.6472e-05
TMEM119	4	0.16518	0.3257	0.986466	6390	1	0.4857	0.03286	0.083519	0.999893	1585	3	0.4857	4.6472e-05
GTF2IRD2	4	0.95106	0.95132	1	18288	0	0.23574	0.032927	0.083653	0.999893	1586	2	0.23574	4.6472e-05
ITFG2	4	0.25426	0.41158	1	7934	1	0.82366	0.032941	0.08369	0.999893	1587	3	0.82366	4.6472e-05
ADAR	4	0.3736	0.52532	1	10126	1	0.59474	0.032977	0.08376	0.999893	1588	3	0.59474	4.6472e-05
GRM6	4	0.7994	0.80789	1	15432	1	0.46777	0.032977	0.08376	0.999893	1589	3	0.46777	4.6472e-05
ODAM	4	0.53711	0.6657	1	12733	1	0.50774	0.032986	0.083776	0.999893	1590	3	0.50774	4.6472e-05
C8orf34	4	0.61823	0.70126	1	13392	1	0.45376	0.033005	0.083815	0.999893	1591	2	0.45376	4.6472e-05
TRIML2	4	0.92587	0.92614	1	17766	0	0.4287	0.033015	0.083835	0.999893	1592	2	0.4287	4.6472e-05
IPO11	4	0.56262	0.67634	1	12920	1	-0.0026693	0.033028	0.083872	0.999893	1593	2	-0.0026693	0
RPL7L1	4	0.92958	0.92981	1	17839	0	0.76413	0.033078	0.083975	0.999893	1594	3	0.76413	4.6472e-05
GOSR1	4	0.81077	0.8167	1	15607	1	0.48318	0.033087	0.083992	0.999893	1595	3	0.48318	4.6472e-05
SKA3	4	0.57128	0.68009	1	12990	1	0.7327	0.033098	0.084016	0.999893	1596	3	0.7327	4.6472e-05
TEX264	4	0.77781	0.79186	1	15111	1	0.30365	0.033179	0.084206	0.999893	1597	2	0.30365	4.6472e-05
EMC2	4	0.65407	0.71867	1	13722	1	0.40922	0.033273	0.084428	0.999893	1598	2	0.40922	4.6472e-05
ZNF689	4	0.94487	0.94514	1	18149	0	0.50343	0.033274	0.084431	0.999893	1599	3	0.50343	4.6472e-05
LOC100287036	4	0.32959	0.48352	1	9298	2	0.072534	0.03328	0.084442	0.999893	1600	2	0.072534	4.6472e-05
RASGRP3	4	0.03465	0.095777	0.939418	1968	2	-0.16605	0.033294	0.084475	0.999893	1601	2	-0.16605	0.0271411
RPS3	4	0.70854	0.74798	1	14248	1	0.75185	0.033297	0.084483	0.999893	1602	3	0.75185	4.6472e-05
STRAP	4	0.21037	0.36987	0.995307	7195	2	-0.048017	0.033325	0.084532	0.999893	1603	2	-0.048017	0.00204294
ZC3H11A	4	0.86162	0.86196	1	16441	0	0.55474	0.033346	0.084569	0.999893	1604	2	0.55474	4.6472e-05
MORC1	4	0.97576	0.97597	1	18792	0	0.52131	0.033347	0.084574	0.999893	1605	3	0.52131	4.6472e-05
MMRN2	4	0.3022	0.45732	1	8808	1	0.15677	0.03338	0.084644	0.999893	1606	1	0.15677	4.6472e-05
C11orf31	4	0.91264	0.91294	1	17475	0	-0.12226	0.033431	0.084757	0.999893	1607	1	-0.12226	0
ZNF343	4	0.83988	0.84125	1	16059	1	0.6084	0.033443	0.084787	0.999893	1608	3	0.6084	4.6472e-05
CCDC175	4	0.28362	0.43953	1	8469	1	0.25347	0.033459	0.08482	0.999893	1609	2	0.25347	4.6472e-05
TIGD2	4	0.3519	0.50468	1	9718	1	0.50829	0.033501	0.084905	0.999893	1610	2	0.50829	4.6472e-05
SMARCB1	4	0.73624	0.76458	1	14584	1	0.17863	0.033506	0.084917	0.999893	1611	2	0.17863	4.6472e-05
ABCB1	4	0.38644	0.53765	1	10343	2	0.12539	0.033506	0.084917	0.999893	1612	2	0.12539	4.6472e-05
TRAPPC2	4	0.98074	0.98094	1	18896	0	0.47421	0.033567	0.085039	0.999893	1613	3	0.47421	4.6472e-05
BMX	4	0.96829	0.96849	1	18628	0	0.46132	0.033572	0.085047	0.999893	1614	3	0.46132	4.6472e-05
NAV1	4	0.76273	0.78145	1	14910	1	0.32113	0.033582	0.085066	0.999893	1615	2	0.32113	4.6472e-05
SPANXN3	4	0.95634	0.95657	1	18380	0	0.35978	0.033632	0.085169	0.999893	1616	2	0.35978	4.6472e-05
CAPN14	4	0.81351	0.81887	1	15648	1	0.28769	0.033657	0.085217	0.999893	1617	2	0.28769	4.6472e-05
SPDYE1	4	0.35246	0.50523	1	9730	2	-0.024328	0.033682	0.085267	0.999893	1618	2	-0.024328	0
RNASE7	4	0.38737	0.53852	1	10359	1	0.022766	0.033733	0.085382	0.999893	1619	1	0.022766	4.6472e-05
SLC26A5	4	0.49279	0.64066	1	12276	1	0.61927	0.033802	0.085513	0.999893	1620	3	0.61927	4.6472e-05
WDR41	4	0.71365	0.75092	1	14297	1	0.41827	0.033833	0.085594	0.999893	1621	3	0.41827	4.6472e-05
DDI2	4	0.95557	0.95578	1	18370	0	0.45493	0.033833	0.085594	0.999893	1622	2	0.45493	4.6472e-05
RHOBTB1	4	0.050983	0.12742	0.959701	2571	1	0.65772	0.033861	0.085652	0.999893	1623	3	0.65772	4.6472e-05
ADGRE2	4	0.85088	0.8515	1	16256	1	0.78232	0.033873	0.085668	0.999893	1624	3	0.78232	4.6472e-05
PHOSPHO2	4	0.89568	0.89588	1	17142	0	0.60778	0.033929	0.085802	0.999893	1625	3	0.60778	4.6472e-05
TMEM80	4	0.077135	0.17614	0.964726	3514	2	-0.373	0.033934	0.085816	0.999893	1626	2	-0.373	0.015596
ZNF680	4	0.90688	0.90719	1	17356	0	0.39636	0.033969	0.085885	0.999893	1627	2	0.39636	4.6472e-05
LARGE	4	0.86433	0.86464	1	16492	0	0.46328	0.034032	0.086011	0.999893	1628	3	0.46328	4.6472e-05
LRRC4B	4	0.71144	0.74967	1	14278	1	0.64653	0.034106	0.086167	0.999893	1629	3	0.64653	4.6472e-05
NUP155	4	0.28358	0.43949	1	8467	2	0.10764	0.034135	0.086229	0.999893	1630	2	0.10764	4.6472e-05
CCT8	4	0.93991	0.94016	1	18048	0	0.67846	0.034197	0.086349	0.999893	1631	3	0.67846	4.6472e-05
THEM6	4	0.052323	0.12999	0.963665	2612	1	0.44307	0.034243	0.086439	0.999893	1632	3	0.44307	4.6472e-05
ALDH1A2	4	0.52484	0.66086	1	12645	1	0.43033	0.034303	0.086563	0.999893	1633	2	0.43033	4.6472e-05
SH2D1B	4	0.96494	0.96515	1	18562	0	0.59198	0.034323	0.086602	0.999893	1634	3	0.59198	4.6472e-05
TGM3	4	0.9157	0.91604	1	17534	0	0.4191	0.034337	0.086632	0.999893	1635	3	0.4191	4.6472e-05
SLC12A1	4	0.85489	0.85535	1	16323	1	0.46422	0.034345	0.086647	0.999893	1636	2	0.46422	4.6472e-05
AFM	4	0.63697	0.71021	1	13563	1	0.47569	0.034374	0.086703	0.999893	1637	3	0.47569	4.6472e-05
CWF19L2	4	0.73651	0.76476	1	14591	1	0.68371	0.034386	0.08673	0.999893	1638	3	0.68371	4.6472e-05
SSR4	4	0.46442	0.6131	1	11736	1	0.24265	0.034387	0.086732	0.999893	1639	2	0.24265	4.6472e-05
PNPT1	4	0.95021	0.95044	1	18272	0	0.77273	0.034406	0.086769	0.999893	1640	3	0.77273	4.6472e-05
LPP	4	0.98457	0.98469	1	18966	0	0.51668	0.034426	0.086818	0.999893	1641	3	0.51668	4.6472e-05
C1orf233	4	0.12358	0.2575	0.986466	5053	2	-0.23612	0.034429	0.08683	0.999893	1642	2	-0.23612	0.00591788
DOCK11	4	0.74407	0.76947	1	14675	1	0.47331	0.034437	0.086845	0.999893	1643	3	0.47331	4.6472e-05
SPIRE2	4	0.52773	0.66199	1	12668	1	0.53046	0.034461	0.08689	0.999893	1644	2	0.53046	4.6472e-05
MALSU1	4	0.46948	0.61801	1	11826	1	0.26141	0.034488	0.086945	0.999893	1645	2	0.26141	4.6472e-05
DPEP3	4	0.81387	0.81916	1	15657	1	0.52741	0.034513	0.086991	0.999893	1646	2	0.52741	4.6472e-05
PRIM2	4	0.87585	0.87615	1	16725	0	-0.095193	0.034538	0.087037	0.999893	1647	1	-0.095193	0
FAM171B	4	0.38212	0.53349	1	10262	2	-0.20606	0.034638	0.087215	0.999893	1648	1	-0.20606	0
LDB3	4	0.13594	0.27824	0.986466	5436	2	0.08074	0.03466	0.087263	0.999893	1649	2	0.08074	4.6472e-05
PLA2G15	4	0.055508	0.13602	0.964726	2721	2	-0.15349	0.034671	0.087288	0.999893	1650	2	-0.15349	0.015596
NTRK1	4	0.23349	0.39193	1	7586	2	-0.22614	0.034689	0.087318	0.999893	1651	2	-0.22614	0
KMT2B	4	0.58392	0.6856	1	13094	1	0.53157	0.034692	0.087322	0.999893	1652	2	0.53157	4.6472e-05
GMEB2	4	0.47192	0.62045	1	11875	1	0.37258	0.034702	0.087342	0.999893	1653	2	0.37258	4.6472e-05
SPG21	4	0.38311	0.53442	1	10286	1	0.5178	0.034725	0.087389	0.999893	1654	3	0.5178	4.6472e-05
ABCG2	4	0.49181	0.63969	1	12252	2	0.24391	0.034739	0.087417	0.999893	1655	2	0.24391	4.6472e-05
WDR36	4	0.94572	0.94598	1	18163	0	0.68952	0.034748	0.087435	0.999893	1656	3	0.68952	4.6472e-05
JUN	4	0.98436	0.9845	1	18956	0	0.76765	0.034754	0.087448	0.999893	1657	3	0.76765	4.6472e-05
RHOH	4	0.87304	0.87334	1	16671	0	-0.17188	0.034789	0.087517	0.999893	1658	1	-0.17188	0
RRS1	4	0.96734	0.96756	1	18609	0	0.20836	0.03484	0.087619	0.999893	1659	2	0.20836	4.6472e-05
CD1E	4	0.53968	0.66673	1	12753	1	0.36283	0.03485	0.087634	0.999893	1660	2	0.36283	4.6472e-05
KIF1BP	4	0.36826	0.52017	1	10029	2	0.13792	0.034913	0.087769	0.999893	1661	2	0.13792	4.6472e-05
HIF1AN	4	0.73297	0.76256	1	14544	1	0.45404	0.03493	0.087799	0.999893	1662	3	0.45404	4.6472e-05
LDOC1L	4	0.93731	0.93755	1	17991	0	0.15794	0.034991	0.087933	0.999893	1663	2	0.15794	4.6472e-05
DDB2	4	0.653	0.71813	1	13714	1	0.60892	0.035026	0.088005	0.999893	1664	3	0.60892	4.6472e-05
TCEAL6	4	0.60435	0.69476	1	13281	1	0.16177	0.035041	0.088043	0.999893	1665	1	0.16177	4.6472e-05
CXCL6	4	0.95786	0.9581	1	18415	0	0.16558	0.035091	0.088146	0.999893	1666	2	0.16558	4.6472e-05
ZNF544	4	0.73885	0.76621	1	14621	1	0.41277	0.03513	0.088234	0.999893	1667	2	0.41277	4.6472e-05
RLN2	4	0.92877	0.92903	1	17823	0	0.52278	0.035136	0.08824	0.999893	1668	3	0.52278	4.6472e-05
GPAT2	4	0.83837	0.83987	1	16032	1	0.38625	0.035157	0.08829	0.999893	1669	2	0.38625	4.6472e-05
NUP37	4	0.076895	0.1757	0.964726	3502	3	-0.67617	0.035192	0.088372	0.999893	1670	1	-0.67617	0.015596
PPP1R3E	4	0.39814	0.54893	1	10540	2	0.07629	0.035209	0.088404	0.999893	1671	2	0.07629	4.6472e-05
PSMD13	4	0.91481	0.91513	1	17521	0	0.58466	0.035246	0.088497	0.999893	1672	3	0.58466	4.6472e-05
RNF223	4	0.98561	0.9857	1	18988	0	0.51963	0.035252	0.088507	0.999893	1673	3	0.51963	4.6472e-05
MED23	4	0.66117	0.72222	1	13794	1	0.55011	0.035258	0.088518	0.999893	1674	3	0.55011	4.6472e-05
PRRT2	4	0.4015	0.55226	1	10594	2	0.076467	0.035292	0.088598	0.999893	1675	2	0.076467	4.6472e-05
GYS2	4	0.66827	0.72586	1	13865	1	0.56628	0.035305	0.088625	0.999893	1676	3	0.56628	4.6472e-05
ASIC5	4	0.336	0.48957	1	9402	2	0.077701	0.035369	0.088753	0.999893	1677	2	0.077701	4.6472e-05
SNAI1	4	0.64765	0.71543	1	13659	1	0.22681	0.035393	0.088811	0.999893	1678	2	0.22681	4.6472e-05
CADPS	4	0.98911	0.98911	1	19070	0	0.48102	0.035479	0.088995	0.999893	1679	3	0.48102	4.6472e-05
NDUFAF6	4	0.89173	0.8919	1	17070	0	0.44114	0.035496	0.089023	0.999893	1680	2	0.44114	4.6472e-05
ABTB1	4	0.9171	0.91744	1	17568	0	0.37556	0.035528	0.089086	0.999893	1681	2	0.37556	4.6472e-05
C18orf65	4	0.26287	0.41975	1	8086	2	-0.4	0.035544	0.089118	0.999893	1682	1	-0.4	0
TBKBP1	4	0.97335	0.97355	1	18731	0	0.77792	0.035549	0.089128	0.999893	1683	3	0.77792	4.6472e-05
YTHDF1	4	0.9702	0.97042	1	18668	0	0.61279	0.035632	0.089295	0.999893	1684	3	0.61279	4.6472e-05
C19orf35	4	0.79749	0.80639	1	15404	1	0.35079	0.035634	0.089299	0.999893	1685	2	0.35079	4.6472e-05
MIPEP	4	0.3966	0.5474	1	10513	1	0.59093	0.035661	0.089345	0.999893	1686	3	0.59093	4.6472e-05
NAGPA	4	0.41088	0.56141	1	10767	1	0.53779	0.035666	0.089357	0.999893	1687	2	0.53779	4.6472e-05
RPAP3	4	0.6105	0.69761	1	13330	1	0.61727	0.035667	0.089358	0.999893	1688	3	0.61727	4.6472e-05
ZNF214	4	0.93113	0.9314	1	17871	0	0.071418	0.035694	0.089421	0.999893	1689	1	0.071418	4.6472e-05
C1orf168	4	0.81743	0.82204	1	15699	1	0.58167	0.035731	0.089493	0.999893	1690	3	0.58167	4.6472e-05
C16orf59	4	0.20962	0.36918	0.99491	7184	2	-0.5668	0.035745	0.089515	0.999893	1691	1	-0.5668	0.0022162
USP17L2	4	0.87832	0.87863	1	16767	0	0.16222	0.035795	0.089627	0.999893	1692	2	0.16222	4.6472e-05
TESK1	4	0.36675	0.51878	1	9999	2	0.095431	0.035845	0.08973	0.999893	1693	2	0.095431	4.6472e-05
ADORA2B	4	0.79417	0.80386	1	15347	1	0.47901	0.035931	0.089917	0.999893	1694	3	0.47901	4.6472e-05
C1QB	4	0.2883	0.44408	1	8548	2	-0.3584	0.035996	0.090034	0.999893	1695	1	-0.3584	0
KCTD2	4	0.33426	0.48797	1	9375	1	0.014694	0.036046	0.09014	0.999893	1696	1	0.014694	4.6472e-05
MSX2	4	0.94424	0.94452	1	18134	0	0.62371	0.036062	0.090165	0.999893	1697	2	0.62371	4.6472e-05
OR6T1	4	0.076254	0.17458	0.964726	3478	1	0.44711	0.036067	0.090171	0.999893	1698	3	0.44711	4.6472e-05
LARS	4	0.00018077	0.00070586	0.713078	18	2	-0.19939	0.036096	0.090231	0.999893	1699	1	-0.19939	0.146863
RAB39A	4	0.085648	0.19136	0.964726	3835	3	-0.84692	0.036197	0.090441	0.999893	1700	1	-0.84692	0.015596
AVL9	4	0.83076	0.83321	1	15902	1	0.62341	0.036222	0.090493	0.999893	1701	3	0.62341	4.6472e-05
LARP1	4	0.50571	0.65325	1	12508	2	0.29104	0.036244	0.090543	0.999893	1702	2	0.29104	4.6472e-05
RTN3	4	0.90227	0.90254	1	17279	0	0.13315	0.036297	0.09066	0.999893	1703	2	0.13315	4.6472e-05
ALG13	4	0.98523	0.98534	1	18982	0	0.5042	0.036339	0.090744	0.999893	1704	3	0.5042	4.6472e-05
OPTC	4	0.073524	0.16957	0.964726	3375	3	-0.77191	0.036348	0.090767	0.999893	1705	1	-0.77191	0.015596
IFNGR2	4	0.57357	0.68108	1	13008	1	0.17745	0.036398	0.090863	0.999893	1706	2	0.17745	4.6472e-05
PLEKHO1	4	0.39301	0.54396	1	10452	1	0.30934	0.036405	0.090878	0.999893	1707	2	0.30934	4.6472e-05
FEN1	4	0.97333	0.97353	1	18730	0	0.5869	0.036475	0.091028	0.999893	1708	3	0.5869	4.6472e-05
TSPAN6	4	0.90359	0.90382	1	17303	0	0.36537	0.036502	0.091079	0.999893	1709	2	0.36537	4.6472e-05
TRMT1	4	0.86966	0.86996	1	16605	0	0.6002	0.036549	0.091163	0.999893	1710	3	0.6002	4.6472e-05
CCSER1	4	0.72419	0.75728	1	14423	1	0.46815	0.036564	0.091193	0.999893	1711	3	0.46815	4.6472e-05
UNC5CL	4	0.81343	0.81881	1	15647	1	0.015399	0.036599	0.091278	0.999893	1712	1	0.015399	4.6472e-05
GIT2	4	0.9646	0.96483	1	18552	0	0.54268	0.036649	0.091374	0.999893	1713	3	0.54268	4.6472e-05
ARHGAP19	4	0.39253	0.54349	1	10444	2	0.063591	0.036749	0.091569	0.999893	1714	2	0.063591	4.6472e-05
MAT2B	4	0.39849	0.54926	1	10547	2	0.36601	0.036793	0.091653	0.999893	1715	2	0.36601	4.6472e-05
KIRREL	4	0.97543	0.97564	1	18785	0	0.5753	0.036809	0.091686	0.999893	1716	3	0.5753	4.6472e-05
LSR	4	0.081354	0.18375	0.964726	3675	1	0.51249	0.036934	0.091928	0.999893	1717	3	0.51249	4.6472e-05
USP2	4	0.36197	0.5143	1	9914	2	0.17942	0.036966	0.091997	0.999893	1718	2	0.17942	4.6472e-05
MZT2A	4	0.449	0.59809	1	11474	1	0.47159	0.036977	0.092022	0.999893	1719	3	0.47159	4.6472e-05
LRCH1	4	0.75974	0.77952	1	14869	1	0.51884	0.036994	0.09206	0.999893	1720	3	0.51884	4.6472e-05
GRID2	4	0.19785	0.35794	0.991925	6985	2	-0.075778	0.036998	0.09207	0.999893	1721	2	-0.075778	0.00352116
AP3M1	4	0.17673	0.33778	0.989562	6603	2	-0.2138	0.037051	0.092188	0.999893	1722	2	-0.2138	0.00455699
EXOG	4	0.40564	0.55629	1	10676	2	0.038267	0.037101	0.092286	0.999893	1723	2	0.038267	4.6472e-05
LRRC71	4	0.97511	0.9753	1	18774	0	0.59394	0.037102	0.092288	0.999893	1724	3	0.59394	4.6472e-05
BBS7	4	0.7577	0.77818	1	14844	1	0.54774	0.037114	0.092314	0.999893	1725	3	0.54774	4.6472e-05
PRDM12	4	0.47839	0.6267	1	12003	1	-0.13831	0.037151	0.092397	0.999893	1726	1	-0.13831	0
MLH3	4	0.97901	0.97921	1	18850	0	0.34544	0.037201	0.092504	0.999893	1727	2	0.34544	4.6472e-05
ABCA8	4	0.88029	0.88057	1	16814	0	0.28454	0.037252	0.092602	0.999893	1728	2	0.28454	4.6472e-05
SLC26A3	4	0.39333	0.54426	1	10461	2	0.20814	0.037269	0.092634	0.999893	1729	2	0.20814	4.6472e-05
FKBP1B	4	0.554	0.67264	1	12869	1	-0.0488	0.037302	0.092703	0.999893	1730	1	-0.0488	0
POLR2I	4	0.8925	0.89269	1	17086	0	0.57068	0.037325	0.092758	0.999893	1731	3	0.57068	4.6472e-05
POLR1D	4	0.12275	0.25609	0.986463	5024	2	-0.0044699	0.037352	0.092814	0.999893	1732	2	-0.0044699	0.0059192
ZNF286B	4	0.96616	0.96638	1	18585	0	0.67988	0.037422	0.092964	0.999893	1733	3	0.67988	4.6472e-05
STOML1	4	0.27416	0.43056	1	8295	1	0.64488	0.037466	0.093049	0.999893	1734	3	0.64488	4.6472e-05
SUV39H1	4	0.045796	0.1176	0.956034	2382	3	-0.87735	0.037503	0.093125	0.999893	1735	1	-0.87735	0.0195267
PCDH12	4	0.25827	0.41535	1	8009	2	-0.17892	0.037553	0.093233	0.999893	1736	2	-0.17892	0
CCNL2	4	0.98002	0.98022	1	18878	0	0.51949	0.037574	0.093272	0.999893	1737	3	0.51949	4.6472e-05
PPFIBP2	4	0.73435	0.76341	1	14557	1	0.20967	0.037653	0.093445	0.999893	1738	1	0.20967	4.6472e-05
PSMC4	4	0.97808	0.97827	1	18827	0	0.93348	0.037694	0.093528	0.999893	1739	3	0.93348	4.6472e-05
TNFAIP3	4	0.86562	0.86593	1	16518	0	0.436	0.037703	0.093548	0.999893	1740	2	0.436	4.6472e-05
SF3A2	4	0.2776	0.43384	1	8368	1	0.43142	0.037749	0.093632	0.999893	1741	2	0.43142	4.6472e-05
SMIM24	4	0.33457	0.48826	1	9381	1	0.23203	0.037754	0.093638	0.999893	1742	2	0.23203	4.6472e-05
EXOSC5	4	0.94596	0.94621	1	18173	0	0.54716	0.037778	0.09369	0.999893	1743	3	0.54716	4.6472e-05
PIN4	4	0.97731	0.97748	1	18813	0	0.55612	0.03779	0.093714	0.999893	1744	3	0.55612	4.6472e-05
UNC13B	4	0.98915	0.98915	1	19071	0	0.60225	0.037803	0.093735	0.999893	1745	3	0.60225	4.6472e-05
TM4SF19	4	0.5316	0.66351	1	12689	1	0.11183	0.037804	0.093736	0.999893	1746	1	0.11183	4.6472e-05
CAPN10	4	0.97095	0.97115	1	18679	0	0.68209	0.037836	0.09379	0.999893	1747	3	0.68209	4.6472e-05
LARP4	4	0.64137	0.71235	1	13602	1	0.54079	0.037863	0.093847	0.999893	1748	3	0.54079	4.6472e-05
FAM149B1	4	0.96066	0.96091	1	18483	0	0.41649	0.037869	0.09386	0.999893	1749	2	0.41649	4.6472e-05
DDX3X	4	0.26645	0.42314	1	8152	2	-0.29526	0.037904	0.093932	0.999893	1750	1	-0.29526	0
SLC22A8	4	0.89366	0.89382	1	17111	0	0.35064	0.037954	0.094043	0.999893	1751	2	0.35064	4.6472e-05
GPBAR1	4	0.98509	0.98522	1	18979	0	0.50878	0.037955	0.094043	0.999893	1752	3	0.50878	4.6472e-05
CXorf23	4	0.2905	0.44617	1	8589	2	-0.14261	0.038004	0.094148	0.999893	1753	2	-0.14261	0
SLCO4A1	4	0.80401	0.8114	1	15497	1	0.31079	0.038011	0.09416	0.999893	1754	2	0.31079	4.6472e-05
FASTKD2	4	0.88698	0.88719	1	16966	0	0.38018	0.038022	0.094185	0.999893	1755	3	0.38018	4.6472e-05
RSRC1	4	0.65021	0.71675	1	13686	1	0.47174	0.038046	0.094241	0.999893	1756	3	0.47174	4.6472e-05
NEMF	4	0.40629	0.55692	1	10688	1	0.25323	0.038055	0.094258	0.999893	1757	2	0.25323	4.6472e-05
GAS2L2	4	0.578	0.68304	1	13044	1	0.50652	0.038077	0.094304	0.999893	1758	2	0.50652	4.6472e-05
MTMR7	4	0.23503	0.39339	1	7612	2	-0.45357	0.038105	0.09436	0.999893	1759	1	-0.45357	0
PCBD2	4	0.89493	0.89511	1	17130	0	0.31862	0.038155	0.094457	0.999893	1760	2	0.31862	4.6472e-05
TNNI3	4	0.92369	0.924	1	17726	0	0.63177	0.038162	0.094469	0.999893	1761	3	0.63177	4.6472e-05
NOTO	4	0.19791	0.358	0.991925	6986	2	-0.086701	0.038205	0.094552	0.999893	1762	2	-0.086701	0.00352116
TTC27	4	0.95354	0.95377	1	18329	0	0.44092	0.038209	0.094558	0.999893	1763	2	0.44092	4.6472e-05
NUTF2	4	0.9223	0.9226	1	17691	0	0.56523	0.038255	0.094638	0.999893	1764	2	0.56523	4.6472e-05
ZNF85	4	0.27237	0.42879	1	8256	1	0.72364	0.038308	0.094732	0.999893	1765	3	0.72364	4.6472e-05
HPS4	4	0.92213	0.92242	1	17683	0	0.83868	0.03833	0.094777	0.999893	1766	3	0.83868	4.6472e-05
NR2E3	4	0.90631	0.90661	1	17346	0	0.43479	0.03834	0.094792	0.999893	1767	2	0.43479	4.6472e-05
DDX49	4	0.8522	0.85277	1	16281	1	0.28304	0.038356	0.094827	0.999893	1768	2	0.28304	4.6472e-05
POR	4	0.44811	0.59718	1	11454	1	0.52799	0.038376	0.094871	0.999893	1769	3	0.52799	4.6472e-05
PLK1	4	0.5887	0.6877	1	13137	1	0.55116	0.038395	0.094894	0.999893	1770	2	0.55116	4.6472e-05
DPYD	4	0.12647	0.26236	0.986466	5137	2	-0.42186	0.038406	0.094914	0.999893	1771	2	-0.42186	0.00591788
FYCO1	4	0.9879	0.98791	1	19041	0	0.46445	0.038425	0.094944	0.999893	1772	3	0.46445	4.6472e-05
ANAPC5	4	0.75103	0.77388	1	14764	1	-0.064295	0.038456	0.095018	0.999893	1773	1	-0.064295	0
DARS	4	0.40665	0.55727	1	10693	1	0.56076	0.038473	0.095041	0.999893	1774	3	0.56076	4.6472e-05
POPDC2	4	0.39382	0.54473	1	10469	1	0.60886	0.038493	0.095079	0.999893	1775	3	0.60886	4.6472e-05
RPP38	4	0.97793	0.97812	1	18822	0	0.70202	0.038523	0.095139	0.999893	1776	3	0.70202	4.6472e-05
UBA52	4	0.97728	0.97745	1	18812	0	0.84264	0.038542	0.09518	0.999893	1777	3	0.84264	4.6472e-05
FOSL2	4	0.84457	0.84551	1	16146	1	0.36976	0.038556	0.095205	0.999893	1778	2	0.36976	4.6472e-05
PTAFR	4	0.7391	0.76637	1	14624	1	0.58009	0.038579	0.095257	0.999893	1779	3	0.58009	4.6472e-05
LUZP1	4	0.3156	0.47008	1	9041	1	-0.13645	0.038606	0.095316	0.999893	1780	1	-0.13645	0
IP6K3	4	0.47967	0.62801	1	12025	2	0.1893	0.038627	0.095358	0.999893	1781	2	0.1893	4.6472e-05
WTH3DI	4	0.93539	0.93568	1	17954	0	0.60617	0.038646	0.095397	0.999893	1782	3	0.60617	4.6472e-05
SLN	4	0.6594	0.72135	1	13774	1	0.10874	0.038657	0.09542	0.999893	1783	1	0.10874	4.6472e-05
OR2M3	4	0.19011	0.35054	0.991925	6836	2	-0.20076	0.038682	0.095476	0.999893	1784	2	-0.20076	0.00352116
HOXD12	4	0.44768	0.59679	1	11447	1	0.49495	0.038696	0.095506	0.999893	1785	3	0.49495	4.6472e-05
HAX1	4	0.9566	0.9568	1	18389	0	0.64804	0.038715	0.095538	0.999893	1786	2	0.64804	4.6472e-05
METTL2A	4	0.87246	0.87276	1	16659	0	0.47452	0.038739	0.095595	0.999893	1787	3	0.47452	4.6472e-05
PPP1R3D	4	0.66485	0.72413	1	13830	1	0.25799	0.038757	0.09563	0.999893	1788	2	0.25799	4.6472e-05
PARVG	4	0.93196	0.93222	1	17887	0	0.46599	0.038759	0.095636	0.999893	1789	2	0.46599	4.6472e-05
IDNK	4	0.96697	0.9672	1	18601	0	0.58004	0.03877	0.095663	0.999893	1790	3	0.58004	4.6472e-05
RAB1B	4	0.89975	0.89996	1	17229	0	0.39665	0.038857	0.095855	0.999893	1791	2	0.39665	4.6472e-05
SRD5A1	4	0.92414	0.92444	1	17734	0	0.53285	0.038881	0.095896	0.999893	1792	2	0.53285	4.6472e-05
PQBP1	4	0.89006	0.89027	1	17035	0	0.47196	0.038887	0.095904	0.999893	1793	3	0.47196	4.6472e-05
AVPI1	4	0.12089	0.25293	0.98574	4967	3	-0.40111	0.038907	0.095954	0.999893	1794	1	-0.40111	0.00623762
SSMEM1	4	0.50099	0.64867	1	12414	1	0.22862	0.038957	0.096068	0.999893	1795	1	0.22862	4.6472e-05
Control_174	4	0.44286	0.59218	1	11365	1	0.47801	0.038998	0.096164	0.999893	1796	3	0.47801	4.6472e-05
WNT7A	4	0.1583	0.31481	0.986466	6154	2	-0.5458	0.039007	0.096182	0.999893	1797	1	-0.5458	0.00591788
LZIC	4	0.0091368	0.030822	0.907737	635	1	0.45725	0.039054	0.096275	0.999893	1798	3	0.45725	4.6472e-05
C6orf201	4	0.50305	0.65062	1	12450	2	0.058921	0.039058	0.096288	0.999893	1799	2	0.058921	4.6472e-05
SLC4A8	4	0.92815	0.92841	1	17810	0	0.7167	0.039122	0.096434	0.999893	1800	3	0.7167	4.6472e-05
TSPAN7	4	0.58842	0.68759	1	13134	1	0.44194	0.039134	0.096466	0.999893	1801	3	0.44194	4.6472e-05
LY6G5C	4	0.57439	0.68145	1	13016	1	0.4652	0.039147	0.09649	0.999893	1802	2	0.4652	4.6472e-05
TRAF3IP1	4	0.92574	0.92602	1	17762	0	0.44226	0.039165	0.096525	0.999893	1803	3	0.44226	4.6472e-05
TMEM205	4	0.31289	0.46752	1	8994	2	-0.46792	0.039208	0.096612	0.999893	1804	1	-0.46792	0
CLEC4D	4	0.49869	0.64641	1	12380	1	0.55876	0.039234	0.096657	0.999893	1805	3	0.55876	4.6472e-05
DCTD	4	0.412	0.56245	1	10789	1	0.5751	0.039265	0.096726	0.999893	1806	3	0.5751	4.6472e-05
TRPV5	4	0.33199	0.48578	1	9337	2	-0.08475	0.039269	0.096735	0.999893	1807	2	-0.08475	0
AIDA	4	0.83562	0.83743	1	15986	1	0.57615	0.039313	0.096827	0.999893	1808	3	0.57615	4.6472e-05
IFNA10	4	0.80228	0.81011	1	15465	1	0.28098	0.039358	0.096918	0.999893	1809	2	0.28098	4.6472e-05
PGAP1	4	0.6453	0.71426	1	13636	1	0.6784	0.039377	0.096955	0.999893	1810	3	0.6784	4.6472e-05
ZC3H12A	4	0.89664	0.89687	1	17166	0	0.48558	0.039408	0.097016	0.999893	1811	3	0.48558	4.6472e-05
CHMP4A	4	0.064184	0.15222	0.964726	3034	3	-0.73587	0.039409	0.097016	0.999893	1812	1	-0.73587	0.015596
MEPE	4	0.43966	0.58906	1	11306	2	0.16488	0.039458	0.097136	0.999893	1813	2	0.16488	4.6472e-05
KRT24	4	0.88083	0.88111	1	16831	0	0.50685	0.039459	0.097137	0.999893	1814	3	0.50685	4.6472e-05
TSPYL2	4	0.27785	0.43407	1	8373	1	0.49927	0.039467	0.097161	0.999893	1815	3	0.49927	4.6472e-05
GAS2	4	0.9791	0.97931	1	18855	0	0.83085	0.039483	0.09719	0.999893	1816	3	0.83085	4.6472e-05
KCNQ4	4	0.96316	0.96336	1	18522	0	0.46755	0.039501	0.097224	0.999893	1817	3	0.46755	4.6472e-05
MDN1	4	0.81236	0.81793	1	15629	1	-0.031347	0.039509	0.097234	0.999893	1818	1	-0.031347	0
RECQL	4	0.83352	0.83559	1	15944	1	0.52314	0.039533	0.09728	0.999893	1819	3	0.52314	4.6472e-05
SFXN4	4	0.27843	0.43462	1	8384	1	0.427	0.039558	0.097332	0.999893	1820	3	0.427	4.6472e-05
KLHL30	4	0.41486	0.56517	1	10838	2	-0.11272	0.039559	0.097334	0.999893	1821	1	-0.11272	0
KLHL26	4	0.98629	0.98636	1	19003	0	0.45193	0.039639	0.097502	0.999893	1822	3	0.45193	4.6472e-05
SMIM23	4	0.56423	0.67705	1	12931	1	0.33051	0.039648	0.097526	0.999893	1823	2	0.33051	4.6472e-05
PLCH1	4	0.11729	0.2468	0.984869	4838	3	-0.48656	0.039659	0.097546	0.999893	1824	1	-0.48656	0.00662153
DHODH	4	0.74397	0.76941	1	14673	1	0.53528	0.03967	0.097569	0.999893	1825	2	0.53528	4.6472e-05
C8orf22	4	0.78011	0.79352	1	15140	1	-0.071554	0.039759	0.097751	0.999893	1826	1	-0.071554	0
SLC2A11	4	0.52546	0.66111	1	12656	1	0.53302	0.039764	0.097756	0.999893	1827	3	0.53302	4.6472e-05
PUS1	4	0.55373	0.67253	1	12864	1	0.31673	0.039815	0.097859	0.999893	1828	2	0.31673	4.6472e-05
EIF3B	4	0.93681	0.93705	1	17977	0	0.53123	0.039859	0.097958	0.999893	1829	2	0.53123	4.6472e-05
SPATA31C1	4	0.028411	0.083356	0.937554	1712	2	-0.14532	0.03991	0.098057	0.999893	1830	2	-0.14532	0.0280037
DIS3	4	0.77674	0.79109	1	15099	1	-0.043488	0.03996	0.098171	0.999893	1831	1	-0.043488	0
LRP4	4	0.28573	0.44156	1	8501	2	0.089514	0.039994	0.098246	0.999893	1832	2	0.089514	4.6472e-05
OR2B6	4	0.98869	0.98868	1	19059	0	0.55902	0.040009	0.098276	0.999893	1833	3	0.55902	4.6472e-05
SLC31A1	4	0.92308	0.9234	1	17707	0	0.037663	0.04001	0.098277	0.999893	1834	1	0.037663	4.6472e-05
NDST4	4	0.052522	0.13036	0.964726	2616	1	0.3321	0.040016	0.098291	0.999893	1835	2	0.3321	4.6472e-05
ARL6IP1	4	0.91495	0.91528	1	17523	0	0.55214	0.040021	0.098304	0.999893	1836	3	0.55214	4.6472e-05
SIT1	4	0.47914	0.62747	1	12015	2	0.11155	0.04011	0.098501	0.999893	1837	2	0.11155	4.6472e-05
RNF214	4	0.773	0.78847	1	15040	1	0.45592	0.040166	0.098609	0.999893	1838	3	0.45592	4.6472e-05
RPS20	4	0.9399	0.94015	1	18047	0	0.82582	0.040204	0.098691	0.999893	1839	3	0.82582	4.6472e-05
ZCCHC5	4	0.41243	0.56285	1	10798	2	0.16781	0.04021	0.098706	0.999893	1840	2	0.16781	4.6472e-05
UNC119	4	0.98235	0.98254	1	18922	0	0.4466	0.040324	0.098925	0.999893	1841	3	0.4466	4.6472e-05
C9orf3	4	0.94838	0.9486	1	18230	0	0.57006	0.040376	0.099051	0.999893	1842	3	0.57006	4.6472e-05
CDH7	4	0.20132	0.3613	0.992741	7041	2	-0.14224	0.040398	0.099096	0.999893	1843	2	-0.14224	0.00316404
COL1A1	4	0.35119	0.50405	1	9700	1	0.2459	0.040409	0.099121	0.999893	1844	2	0.2459	4.6472e-05
UGT2A3	4	0.65869	0.72098	1	13768	1	0.11709	0.04041	0.099122	0.999893	1845	1	0.11709	4.6472e-05
C12orf80	4	0.13301	0.27333	0.986466	5359	1	0.27286	0.040461	0.099226	0.999893	1846	2	0.27286	4.6472e-05
MED7	4	0.72872	0.76002	1	14490	1	0.56276	0.040476	0.09926	0.999893	1847	3	0.56276	4.6472e-05
ATL2	4	0.69677	0.74134	1	14129	1	0.54858	0.040488	0.099282	0.999893	1848	3	0.54858	4.6472e-05
SPATA31D3	4	0.87599	0.8763	1	16729	0	-0.1098	0.040511	0.099319	0.999893	1849	1	-0.1098	0
KIAA2022	4	0.87927	0.87957	1	16796	0	0.41774	0.040552	0.09941	0.999893	1850	3	0.41774	4.6472e-05
LHX5	4	0.51929	0.65867	1	12604	1	0.27116	0.040561	0.099427	0.999893	1851	2	0.27116	4.6472e-05
PRRC1	4	0.83632	0.83806	1	15996	1	0.45518	0.040589	0.099477	0.999893	1852	2	0.45518	4.6472e-05
RUSC2	4	0.78037	0.7937	1	15143	1	0.26513	0.040601	0.099499	0.999893	1853	2	0.26513	4.6472e-05
TJP1	4	0.67685	0.73039	1	13936	1	-0.15509	0.040611	0.099525	0.999893	1854	1	-0.15509	0
ZNF644	4	0.87864	0.87895	1	16779	0	0.36424	0.040635	0.099579	0.999893	1855	2	0.36424	4.6472e-05
NANOS1	4	0.85158	0.85217	1	16268	1	0.16972	0.040711	0.099742	0.999893	1856	1	0.16972	4.6472e-05
DEPDC4	4	0.76926	0.7859	1	14988	1	0.46673	0.040736	0.09978	0.999893	1857	3	0.46673	4.6472e-05
KRTAP1-1	4	0.90309	0.90334	1	17297	0	0.38124	0.040759	0.099832	0.999893	1858	2	0.38124	4.6472e-05
CNGA1	4	0.35466	0.50735	1	9763	2	-0.037815	0.040781	0.099876	0.999893	1859	2	-0.037815	0
C7orf55-LUC7L2	4	0.28011	0.43622	1	8404	1	0.23079	0.040811	0.099928	0.999893	1860	2	0.23079	4.6472e-05
ZFYVE26	4	0.68985	0.73748	1	14061	1	0.37146	0.040832	0.099973	0.999893	1861	2	0.37146	4.6472e-05
RNPS1	4	0.30705	0.46189	1	8898	2	-0.16443	0.040861	0.10004	0.999893	1862	2	-0.16443	0
SOCS7	4	0.38496	0.53623	1	10322	2	-0.080576	0.040911	0.10013	0.999893	1863	2	-0.080576	0
CTSF	4	0.20114	0.36113	0.992741	7037	2	-0.41291	0.041011	0.10035	0.999893	1864	1	-0.41291	0.00316404
HNRNPA1L2	4	0.50475	0.65229	1	12491	1	0.49288	0.041032	0.10039	0.999893	1865	3	0.49288	4.6472e-05
G6PD	4	0.95778	0.95801	1	18411	0	0.3668	0.041061	0.10045	0.999893	1866	2	0.3668	4.6472e-05
KIR2DL3	4	0.96573	0.96595	1	18574	0	0.71619	0.041067	0.10046	0.999893	1867	3	0.71619	4.6472e-05
IL25	4	0.98853	0.98853	1	19055	0	0.45463	0.041105	0.10055	0.999893	1868	3	0.45463	4.6472e-05
BHLHE22	4	0.74906	0.77264	1	14737	1	0.25828	0.041111	0.10056	0.999893	1869	2	0.25828	4.6472e-05
EMC7	4	0.85979	0.86015	1	16403	1	0.58761	0.041118	0.10057	0.999893	1870	3	0.58761	4.6472e-05
FLT3	4	0.42072	0.57082	1	10946	1	0.5902	0.041208	0.10075	0.999893	1871	3	0.5902	4.6472e-05
DACH2	4	0.55211	0.67185	1	12857	1	0.19593	0.041262	0.10086	0.999893	1872	2	0.19593	4.6472e-05
ATP2B1	4	0.89897	0.89919	1	17213	0	0.41544	0.041262	0.10086	0.999893	1873	3	0.41544	4.6472e-05
SELENBP1	4	0.92521	0.92549	1	17755	0	0.54159	0.04131	0.10096	0.999893	1874	3	0.54159	4.6472e-05
MYO1C	4	0.95578	0.95599	1	18373	0	0.60837	0.041336	0.10102	0.999893	1875	3	0.60837	4.6472e-05
CNGA3	4	0.9261	0.92636	1	17769	0	0.22806	0.041362	0.10108	0.999893	1876	2	0.22806	4.6472e-05
CCDC117	4	0.98178	0.98199	1	18915	0	0.51926	0.041384	0.10113	0.999893	1877	3	0.51926	4.6472e-05
UTP14C	4	0.95831	0.95854	1	18428	0	0.25131	0.041412	0.10119	0.999893	1878	2	0.25131	4.6472e-05
APMAP	4	0.85002	0.85068	1	16236	1	0.4671	0.041445	0.10126	0.999893	1879	3	0.4671	4.6472e-05
UQCRHL	4	0.072649	0.16797	0.964726	3340	3	-0.61729	0.041462	0.1013	0.999893	1880	1	-0.61729	0.015596
RASGEF1A	4	0.97996	0.98017	1	18877	0	0.60878	0.041522	0.10143	0.999893	1881	3	0.60878	4.6472e-05
Control_109	4	0.66028	0.72179	1	13783	1	0.45585	0.041586	0.10156	0.999893	1882	2	0.45585	4.6472e-05
ALG12	4	0.379	0.53047	1	10209	2	-0.18023	0.041612	0.10161	0.999893	1883	2	-0.18023	0
DET1	4	0.080966	0.18303	0.964726	3660	2	-0.18026	0.041662	0.1017	0.999893	1884	2	-0.18026	0.015596
NAGA	4	0.88956	0.88977	1	17019	0	0.28307	0.041712	0.1018	0.999893	1885	2	0.28307	4.6472e-05
ZNF708	4	0.60018	0.69283	1	13240	1	0.30058	0.041712	0.1018	0.999893	1886	2	0.30058	4.6472e-05
SMIM10	4	0.92899	0.92924	1	17826	0	0.69526	0.041735	0.10185	0.999893	1887	3	0.69526	4.6472e-05
KCNK12	4	0.22191	0.38089	0.998357	7381	1	0.46678	0.041746	0.10188	0.999893	1888	2	0.46678	4.6472e-05
CDR1	4	0.61748	0.70087	1	13385	1	0.098568	0.041762	0.10191	0.999893	1889	2	0.098568	4.6472e-05
GDF2	4	0.59935	0.69247	1	13230	1	0.41189	0.04178	0.10195	0.999893	1890	2	0.41189	4.6472e-05
ISL2	4	0.12504	0.25995	0.986466	5092	3	-0.52569	0.041812	0.10201	0.999893	1891	1	-0.52569	0.00591788
RBM47	4	0.48686	0.63491	1	12164	1	0.2228	0.041826	0.10204	0.999893	1892	2	0.2228	4.6472e-05
RPS21	4	0.81214	0.81777	1	15624	1	0.71415	0.041831	0.10205	0.999893	1893	3	0.71415	4.6472e-05
JMJD1C	4	0.34812	0.50116	1	9637	2	0.12111	0.041872	0.10213	0.999893	1894	2	0.12111	4.6472e-05
TBX22	4	0.94431	0.94459	1	18135	0	0.42296	0.041883	0.10215	0.999893	1895	2	0.42296	4.6472e-05
SLC26A2	4	0.25214	0.40959	1	7906	1	0.4823	0.041962	0.10232	0.999893	1896	3	0.4823	4.6472e-05
SLC30A9	4	0.8672	0.86747	1	16549	0	0.34062	0.041963	0.10232	0.999893	1897	2	0.34062	4.6472e-05
OR13C3	4	0.61584	0.70008	1	13371	1	0.58497	0.041993	0.10239	0.999893	1898	3	0.58497	4.6472e-05
SLK	4	0.87588	0.87618	1	16726	0	0.017171	0.042012	0.10243	0.999893	1899	1	0.017171	4.6472e-05
FFAR4	4	0.82145	0.82536	1	15755	1	0.20447	0.042062	0.10254	0.999893	1900	2	0.20447	4.6472e-05
OR2A4	4	0.12156	0.25407	0.986463	4985	3	-0.72806	0.042112	0.10265	0.999893	1901	1	-0.72806	0.0059192
SLC25A13	4	0.41518	0.5655	1	10845	1	0.48138	0.042116	0.10265	0.999893	1902	3	0.48138	4.6472e-05
TMEM154	4	0.25744	0.41457	1	7992	2	-0.40626	0.042212	0.10286	0.999893	1903	1	-0.40626	0
C6orf132	4	0.46436	0.61305	1	11735	1	0.39003	0.042262	0.10295	0.999893	1904	2	0.39003	4.6472e-05
SIRPB1	4	0.42874	0.57852	1	11095	1	0.37593	0.042312	0.10306	0.999893	1905	2	0.37593	4.6472e-05
ARMCX1	4	0.075037	0.17233	0.964726	3432	1	0.43708	0.04233	0.10309	0.999893	1906	3	0.43708	4.6472e-05
DDI1	4	0.51833	0.65829	1	12596	1	-0.099539	0.042362	0.10315	0.999893	1907	1	-0.099539	0
CYP27C1	4	0.94736	0.94759	1	18204	0	0.44825	0.04237	0.10317	0.999893	1908	3	0.44825	4.6472e-05
C9orf24	4	0.34898	0.50195	1	9657	1	0.48432	0.042462	0.10336	0.999893	1909	3	0.48432	4.6472e-05
OR2T1	4	0.15474	0.30901	0.986466	6048	2	-0.024672	0.042512	0.10346	0.999893	1910	2	-0.024672	0.00591788
CACNG2	4	0.2195	0.37857	0.998357	7339	2	0.018595	0.042513	0.10346	0.999893	1911	2	0.018595	4.6472e-05
EMCN	4	0.97148	0.97168	1	18694	0	0.57882	0.042525	0.10348	0.999893	1912	3	0.57882	4.6472e-05
FAF1	4	0.62735	0.7056	1	13478	1	0.28517	0.042536	0.10351	0.999893	1913	2	0.28517	4.6472e-05
RSL24D1	4	0.043321	0.11274	0.955991	2278	2	-0.91784	0.042612	0.10367	0.999893	1914	2	-0.91784	0.0195462
RNF38	4	0.981	0.9812	1	18902	0	0.51274	0.04264	0.10372	0.999893	1915	2	0.51274	4.6472e-05
SGCG	4	0.97485	0.97503	1	18767	0	0.18852	0.042662	0.10377	0.999893	1916	1	0.18852	4.6472e-05
SLC25A14	4	0.98232	0.98251	1	18921	0	0.54235	0.042696	0.10384	0.999893	1917	3	0.54235	4.6472e-05
TBXAS1	4	0.8682	0.86849	1	16571	0	0.43175	0.042709	0.10387	0.999893	1918	2	0.43175	4.6472e-05
ZNF3	4	0.24891	0.40656	1	7854	2	-0.133	0.042712	0.10388	0.999893	1919	2	-0.133	0
NAPA	4	0.34282	0.49605	1	9525	1	0.69537	0.042748	0.10395	0.999893	1920	3	0.69537	4.6472e-05
PCDH11X	4	0.38515	0.53642	1	10324	1	0.22239	0.042762	0.10398	0.999893	1921	2	0.22239	4.6472e-05
FLVCR1	4	0.93578	0.93605	1	17958	0	0.51001	0.042807	0.10407	0.999893	1922	3	0.51001	4.6472e-05
ZNF667	4	0.089212	0.19774	0.968788	3952	2	-0.27519	0.042812	0.10409	0.999893	1923	2	-0.27519	0.0137712
HOXB7	4	0.41193	0.56238	1	10786	2	-0.25871	0.042862	0.10419	0.999893	1924	1	-0.25871	0
PDK1	4	0.2243	0.3832	0.998357	7429	1	0.080329	0.042912	0.10429	0.999893	1925	2	0.080329	4.6472e-05
ARID5B	4	0.1004	0.21754	0.973452	4327	2	-0.39514	0.042962	0.10439	0.999893	1926	2	-0.39514	0.0116855
SIGMAR1	4	0.89344	0.89361	1	17106	0	0.64582	0.042971	0.1044	0.999893	1927	3	0.64582	4.6472e-05
MRPL37	4	0.23143	0.38995	1	7548	2	0.050362	0.042986	0.10443	0.999893	1928	2	0.050362	4.6472e-05
WWOX	4	0.98957	0.98958	1	19085	0	0.54976	0.043004	0.10447	0.999893	1929	3	0.54976	4.6472e-05
MANBA	4	0.83192	0.83422	1	15915	1	0.39955	0.043012	0.10449	0.999893	1930	3	0.39955	4.6472e-05
SENP2	4	0.86355	0.86386	1	16479	0	0.33966	0.043055	0.10456	0.999893	1931	2	0.33966	4.6472e-05
POLQ	4	0.76175	0.78082	1	14900	1	0.51784	0.043096	0.10464	0.999893	1932	3	0.51784	4.6472e-05
ASAH1	4	0.58831	0.68754	1	13132	1	-0.20732	0.043112	0.10467	0.999893	1933	1	-0.20732	0
CACTIN	4	0.76358	0.78204	1	14921	1	0.68916	0.043205	0.10485	0.999893	1934	3	0.68916	4.6472e-05
ART3	4	0.9682	0.96839	1	18625	0	0.51036	0.043212	0.10486	0.999893	1935	3	0.51036	4.6472e-05
COX7C	4	0.76467	0.78276	1	14931	1	0.29303	0.04324	0.10493	0.999893	1936	2	0.29303	4.6472e-05
ING5	4	0.19587	0.35605	0.991925	6936	2	0.019277	0.043262	0.10498	0.999893	1937	2	0.019277	4.6472e-05
MDK	4	0.15171	0.30414	0.986466	5953	2	-0.35336	0.043362	0.10519	0.999893	1938	1	-0.35336	0.00591788
TIGAR	4	0.77646	0.7909	1	15094	1	0.55112	0.043392	0.10525	0.999893	1939	3	0.55112	4.6472e-05
MPST	4	0.98593	0.98601	1	18999	0	0.44645	0.043412	0.10529	0.999893	1940	3	0.44645	4.6472e-05
CYP1A2	4	0.92318	0.92348	1	17712	0	0.4796	0.043412	0.10529	0.999893	1941	3	0.4796	4.6472e-05
MYO3B	4	0.15569	0.31057	0.986466	6072	3	-0.35172	0.043462	0.1054	0.999893	1942	1	-0.35172	0.00591788
MC5R	4	0.96299	0.9632	1	18520	0	0.56056	0.043495	0.10548	0.999893	1943	3	0.56056	4.6472e-05
NDUFS6	4	0.96823	0.96843	1	18627	0	0.77626	0.043507	0.1055	0.999893	1944	2	0.77626	4.6472e-05
EBI3	4	0.7658	0.78353	1	14943	1	0.45905	0.043571	0.10564	0.999893	1945	3	0.45905	4.6472e-05
MCEMP1	4	0.85142	0.85203	1	16266	1	0.39083	0.043631	0.10576	0.999893	1946	3	0.39083	4.6472e-05
KRTAP1-4	4	0.883	0.88328	1	16882	0	0.27721	0.043658	0.10582	0.999893	1947	2	0.27721	4.6472e-05
IMPAD1	4	0.9036	0.90384	1	17304	0	0.81032	0.04367	0.10585	0.999893	1948	3	0.81032	4.6472e-05
GXYLT2	4	0.82992	0.83248	1	15886	1	0.51708	0.043681	0.10587	0.999893	1949	2	0.51708	4.6472e-05
DDX56	4	0.98786	0.98787	1	19040	0	0.74694	0.043704	0.10591	0.999893	1950	3	0.74694	4.6472e-05
SYNPO	4	0.19693	0.35706	0.991925	6961	2	-0.1609	0.043711	0.10593	0.999893	1951	2	-0.1609	0.00352116
GK2	4	0.48595	0.63405	1	12149	1	0.28913	0.043761	0.10604	0.999893	1952	2	0.28913	4.6472e-05
JARID2	4	0.46856	0.61712	1	11813	2	0.21442	0.043774	0.10606	0.999893	1953	2	0.21442	4.6472e-05
PET117	4	0.98486	0.98499	1	18973	0	0.4908	0.043803	0.10612	0.999893	1954	3	0.4908	4.6472e-05
PDE4B	4	0.35193	0.50471	1	9719	2	-0.27995	0.043811	0.10614	0.999893	1955	1	-0.27995	0
RAB8B	4	0.059625	0.14369	0.964726	2874	3	-0.78133	0.043861	0.10624	0.999893	1956	1	-0.78133	0.015596
NUP50	4	0.70132	0.74391	1	14182	1	0.39909	0.043936	0.10637	0.999893	1957	3	0.39909	4.6472e-05
LRRC70	4	0.15921	0.31619	0.986466	6190	1	0.31401	0.043937	0.10637	0.999893	1958	2	0.31401	4.6472e-05
KCNJ1	4	0.93181	0.93207	1	17884	0	0.47652	0.043956	0.1064	0.999893	1959	3	0.47652	4.6472e-05
DGKD	4	0.91396	0.91427	1	17497	0	0.49918	0.043961	0.10641	0.999893	1960	3	0.49918	4.6472e-05
OR10H1	4	0.9799	0.9801	1	18875	0	0.5848	0.043984	0.10646	0.999893	1961	2	0.5848	4.6472e-05
MFSD1	4	0.4345	0.58407	1	11203	2	0.17567	0.043996	0.10648	0.999893	1962	2	0.17567	4.6472e-05
NOX4	4	0.022813	0.071812	0.934416	1488	1	0.33557	0.044042	0.10658	0.999893	1963	2	0.33557	4.6472e-05
LONP1	4	0.89743	0.89765	1	17180	0	0.45752	0.044056	0.10661	0.999893	1964	3	0.45752	4.6472e-05
EXTL2	4	0.61047	0.69759	1	13329	1	0.51055	0.044061	0.10662	0.999893	1965	2	0.51055	4.6472e-05
SMPD4	4	0.92927	0.92951	1	17832	0	0.43205	0.044089	0.10666	0.999893	1966	3	0.43205	4.6472e-05
VRK3	4	0.36892	0.52081	1	10046	2	-0.20085	0.044111	0.1067	0.999893	1967	1	-0.20085	0
BCR	4	0.4038	0.55447	1	10642	2	-0.01221	0.044112	0.10671	0.999893	1968	2	-0.01221	0
RPS12	4	0.88192	0.88222	1	16855	0	0.53656	0.044149	0.10678	0.999893	1969	3	0.53656	4.6472e-05
PGAP3	4	0.20435	0.36415	0.993718	7095	1	0.43806	0.044159	0.1068	0.999893	1970	2	0.43806	4.6472e-05
DISP1	4	0.0032759	0.011628	0.897982	244	2	-0.23971	0.044161	0.1068	0.999893	1971	1	-0.23971	0.0467324
LRGUK	4	0.49124	0.63915	1	12244	2	0.20961	0.044171	0.10682	0.999893	1972	2	0.20961	4.6472e-05
NAGLU	4	0.50546	0.65298	1	12502	2	-0.19255	0.044211	0.1069	0.999893	1973	1	-0.19255	0
FBXW12	4	0.027475	0.081427	0.937554	1669	1	0.38047	0.044241	0.10696	0.999893	1974	2	0.38047	4.6472e-05
CCDC40	4	0.1903	0.35073	0.991925	6840	2	-0.37935	0.044261	0.10699	0.999893	1975	1	-0.37935	0.00352116
ADAMTS6	4	0.90249	0.90276	1	17284	0	0.37065	0.044263	0.10699	0.999893	1976	3	0.37065	4.6472e-05
PRAME	4	0.76118	0.78047	1	14891	1	0.38506	0.044264	0.107	0.999893	1977	2	0.38506	4.6472e-05
PCDHGB4	4	0.16984	0.33129	0.988292	6490	2	-0.11649	0.044311	0.1071	0.999893	1978	2	-0.11649	0.00511472
TMC1	4	0.70019	0.7433	1	14167	1	0.53541	0.044403	0.1073	0.999893	1979	3	0.53541	4.6472e-05
KIF20A	4	0.24006	0.39815	1	7697	2	-0.040731	0.04441	0.10731	0.999893	1980	2	-0.040731	0
USP3	4	0.95008	0.95029	1	18268	0	0.57277	0.044424	0.10734	0.999893	1981	3	0.57277	4.6472e-05
FBXO27	4	0.37891	0.53039	1	10207	2	0.11362	0.044475	0.10745	0.999893	1982	2	0.11362	4.6472e-05
PLEC	4	0.54474	0.6688	1	12795	1	-0.034445	0.04451	0.10752	0.999893	1983	1	-0.034445	0
NCOA2	4	0.22229	0.38128	0.998357	7390	2	-0.008932	0.044557	0.10761	0.999893	1984	2	-0.008932	0.000714133
PIGM	4	0.044969	0.11595	0.955991	2346	3	-0.59598	0.04461	0.10772	0.999893	1985	1	-0.59598	0.0195462
TRAP1	4	0.79933	0.80782	1	15430	1	0.41566	0.044611	0.10772	0.999893	1986	3	0.41566	4.6472e-05
KRTAP25-1	4	0.26493	0.4217	1	8121	1	0.22171	0.044639	0.10778	0.999893	1987	2	0.22171	4.6472e-05
STON1	4	0.94772	0.94795	1	18212	0	0.43067	0.044651	0.10781	0.999893	1988	2	0.43067	4.6472e-05
BLOC1S6	4	0.65035	0.71681	1	13688	1	0.018097	0.04466	0.10783	0.999893	1989	1	0.018097	4.6472e-05
MSR1	4	0.54324	0.66817	1	12781	1	0.51142	0.044665	0.10784	0.999893	1990	3	0.51142	4.6472e-05
BOLA3	4	0.3004	0.45561	1	8777	1	0.66645	0.044685	0.10789	0.999893	1991	3	0.66645	4.6472e-05
CACNA1H	4	0.025937	0.078269	0.937554	1609	2	-0.37785	0.04471	0.10794	0.999893	1992	2	-0.37785	0.0280037
MUC20	4	0.50643	0.65362	1	12516	1	0.49667	0.044732	0.10798	0.999893	1993	3	0.49667	4.6472e-05
XRRA1	4	0.95213	0.95239	1	18308	0	0.53095	0.044746	0.10801	0.999893	1994	3	0.53095	4.6472e-05
CIRH1A	4	0.52204	0.65975	1	12622	1	0.42542	0.04476	0.10804	0.999893	1995	2	0.42542	4.6472e-05
KDF1	4	0.8376	0.8392	1	16016	1	0.57359	0.044766	0.10805	0.999893	1996	3	0.57359	4.6472e-05
FREM1	4	0.97786	0.97805	1	18821	0	0.42568	0.04481	0.10814	0.999893	1997	2	0.42568	4.6472e-05
CFHR3	4	0.85844	0.85881	1	16386	1	0.68942	0.044827	0.10817	0.999893	1998	3	0.68942	4.6472e-05
C17orf47	4	0.87877	0.87907	1	16782	0	0.14313	0.04486	0.10826	0.999893	1999	1	0.14313	4.6472e-05
[truncated: 17,365 more rows]
